# Supplementary material for: A 3.3 Å‐Resolution Structure of Hyperthermophilic Respiratory Complex III Reveals the Mechanism of Its Thermal Stability
Source: PubMed Central journal article supplement (PMC7004027; doi:10.1002/anie.201911554), 2019-11-28
Supplement: ANIE-59-343-s001.pdf [file ANIE-59-343-s001.pdf]

## Supporting Information

### **A 3.3 Å-Resolution Structure of Hyperthermophilic Respiratory Complex III Reveals the Mechanism of its Thermal Stability**

*Guoliang Zhu<sup>+</sup>, Hui Zeng<sup>+</sup>, Shuangbo Zhang<sup>+</sup>, Jana Juli, Xiaoyun Pang, Jan Hoffmann, Yan Zhang, Nina Morgner, Yun Zhu,\* Guohong Peng,\* Hartmut Michel,\* and Fei Sun\**

anie\_201911554\_sm\_miscellaneous\_information.pdf

anie\_201911554\_sm\_Movie\_S1.mp4

### **Author Contributions**

F.S., H.M. and G.P. initiated and supervised the project. G.Z., H.Z., S.Z., X.P., J.J., J.H., Y.Z. and G.P. performed all the experiments. G.Z. and S.Z. performed image processing and solved the cryo-EM structure. H.Z., G.Z., J.H., N.M., G.P. and Y.Z. analyzed the data and wrote the paper with substantial input from H.M. and F.S.

**Table of Contents**

|                                                                                                                                                                |     |
|----------------------------------------------------------------------------------------------------------------------------------------------------------------|-----|
| <b>Experimental Procedures</b> .....                                                                                                                           | S 2 |
| <b>Fig. S1.</b> Identification of the cytochrome <i>bc</i> <sub>1</sub> complex by LILBID-MS .....                                                             | S 4 |
| <b>Fig. S2.</b> Structure determination of the cytochrome <i>bc</i> <sub>1</sub> complex from <i>A. aeolicus</i> . .....                                       | S 5 |
| <b>Fig. S3.</b> Local resolution map of the final 3D density map.....                                                                                          | S 6 |
| <b>Fig. S4.</b> Representative cryo-EM densities of the proteins and ligands of cytochrome <i>bc</i> <sub>1</sub> complex from <i>Aquifex aeolicus</i> . ..... | S 7 |
| <b>Movie. S1 (separate file).</b> The overall map with model fitted.....                                                                                       | S 8 |
| <b>References</b> .....                                                                                                                                        | S 8 |
| <b>Author Contributions</b> .....                                                                                                                              | S 8 |
| <b>Dataset. S1.</b> Full wwPDB/EMDataBank EM Map/Model Validation Report of native cytochrome <i>bc</i> <sub>1</sub> complex .....                             | S 9 |
| <b>Dataset. S2.</b> Full wwPDB/EMDataBank EM Map/Model Validation Report of inhibited cytochrome <i>bc</i> <sub>1</sub> complex .....                          | S55 |

## Experimental Procedures

### Purification and identification of the cytochrome *bc*<sub>1</sub> complex

The cytochrome *bc*<sub>1</sub> complex was purified directly from the cells of the hyperthermophilic and microaerobic bacterium *A. aeolicus*. As a consequence of the limited availability of cells and lack of multiple methods for expression level optimization, many efforts have been focused on purification optimization according to previously reported methods [1]. The result of detergent screening for solubilization suggested dodecyl- $\beta$ -D maltoside (DDM) has the best extraction efficiency for the cytochrome *bc*<sub>1</sub> complex. Then the DDM-solubilized membrane proteins were separated by ion exchange chromatography (Mono Q 10/100 GL, GE). Then fractions containing the cytochrome *bc*<sub>1</sub> complex were pooled and subjected to size exclusion chromatography. The complex was purified by a first size exclusion chromatography step (TSK4000SW, Tosoh) in 20 mM Tris-HCl pH 7.4, 150 mM NaCl and 0.05 % (w/v) DDM. Considering that large micelles of DDM are indistinguishable from protein particles, the purified cytochrome *bc*<sub>1</sub> was applied to a second size exclusion chromatography column (Yarra SEC-4000 column, Phenomenex) to exchange the detergent from DDM to digitonin. The major peak fractions were pooled, and the protein concentration was determined by the BCA assay (Pierce) according to the manufacturer's protocol. After degassing and ultrafiltration, the purified cytochrome *bc*<sub>1</sub> complex (20  $\mu$ g) was subjected to laser-induced liquid-bead ion-desorption mass spectrometry (LILBID-MS) [2] to measure the masses of individual subunits and the intact complex. The mass analysis was done using a time of flight mass spectrometer with a Wiley-McLaren-type acceleration region and an ion reflector. Three independent experiments were performed to ensure the accuracy of the results. The inhibitor complex was prepared by adding antimycin A to the purified proteins with 10 times of molar ratio.

### Cryo-EM Data Acquisition and Processing

An initial model of the cytochrome *bc*<sub>1</sub> complex was obtained after negative stain electron microscopy. Briefly, 5  $\mu$ l of the purified complex sample (0.01 mg/ml) were applied for one minute to glow-discharged copper grids coated with a thin carbon film. After washing 5 times with ultrapure water and uranyl acetate (2% w/v), the sample was stained by uranyl acetate for one minute. Then images were collected on a FEI Talos microscope operated at 200 kV.

For cryo-EM, 3  $\mu$ l of the freshly purified complex sample (1.5 mg/ml) were applied to glow-discharged holey carbon film grids (GIG Au R1/1, 300 mesh), which had been treated with H<sub>2</sub> and O<sub>2</sub> mixtures in a Gatan Solarus plasma cleaner for 1 min. Grids were blotted at 16 °C and 100% humidity for 3s, then flash frozen in liquid ethane and stored in liquid nitrogen using a Vitrobot (FEI). High resolution images were collected on a 300kV FEI Titan Krios transmission electron microscope using SerialEM software [3]. A Gatan K2 detector was used in super-resolution counting mode at a calibrated magnification of 130,000  $\times$  (yielding a pixel size of 0.52 Å). A quantum energy filter (Gatan, 107 Pleasanton, CA), whose energy slit was set to 20 eV, was applied to remove any inelastic scattering. Defocus values varied from -1.5 to -2.5  $\mu$ m. 32 frames per stack were collected with a total exposure time of 7.4s. The dose rate was set to  $\sim$ 9 e<sup>-</sup>/pixel/s and the total dose was  $\sim$ 60 e<sup>-</sup>/Å<sup>2</sup>. Frame alignment, exposure weighting, and contrast transfer function parameters were estimated using Center for Biological Imaging (CBI) platform's automated data collection scripts integrated with Motioncor2 [4] and CTFFIND4 [5] during movie data collection.

### Image processing

Image processing steps were performed using RELION (version 2.1 and version 3.0-beta) [6] and EMAN2 [7]. A low-resolution reconstruction of the complex was built from 1208 micrographs of the negatively stained sample. Particle picking was performed using Gautomatch (<http://www.mrc-lmb.cam.ac.uk/kzhang/Gautomatch/>) without a template to yield 124,989 particles. Reference-free classification was performed, and 16 good-looking classes were selected for initial model building. A total of 87 classes were selected for 3D classification, and finally one class was selected as initial model for subsequent cryo-EM data processing.

For cryo-EM data processing, Gautomatch was used to pick around 21k particles from 200 good quality images without template matching. After one round reference-free 2D classification, 10 representative classes were used as reference for automatic particle picking of all micrographs by Gautomatch, yielding an initial dataset of around 379 000 particles. These were extracted using 128 $\times$ 128 pixel-boxes and sorted by two rounds of 2D classifications. Then 200 982 particles from good 2D classes were selected for the 3D classification, with the previously generated initial model as reference. After that, four classes were selected to yield a subset of 148323 particles, which were re-extracted with refined particle shifts from the original micrographs using a 256 $\times$ 256 pixel-boxes. This refinement resulted in an overall structure at a resolution of 3.8Å. After a second round of 3D classification without alignment, one best class containing 93,622 particles from 14 classes were selected for final refinement. After data post-processing, including refining each particle defocus value by CtfRefine, the overall resolution of the structure reached 3.3 Å according to the gold standard FSC<sub>0.143</sub> (Fourier Shell Correlation) criterion. Local resolution variations were estimated using ResMap [8].

The data for the inhibitor complex was processed in a similar way. Briefly, 108 654 particles were reduced to 107 902 after one round of 2D classification. These particles were processed following refinement and classification without alignment, and finally 81 350 particles were used. Refinement with these particles yielded a map with a resolution of 3.5 Å. Then CtfRefine and Bayesian polishing pushed the resolution to 3.2 Å.

### Model building and Refinement

To build atomic models of cytochrome *bc*<sub>1</sub> complex of *A. aeolicus*, the homologous structure from the soil bacterium *Paracoccus denitrificans* (PDB entry: 2YIU)<sup>[9]</sup> was used as initial model. We were able to trace most regions and many side chains of the three

SUPPORTING INFORMATION

---

subunits in the map using COOT<sup>[10]</sup>. The ligands and phospholipids were also docked into densities and refined using COOT and Phenix<sup>[11]</sup>. All figures were created by Pymol<sup>[12]</sup> or Chimera<sup>[13]</sup>.

## SUPPORTING INFORMATION

A

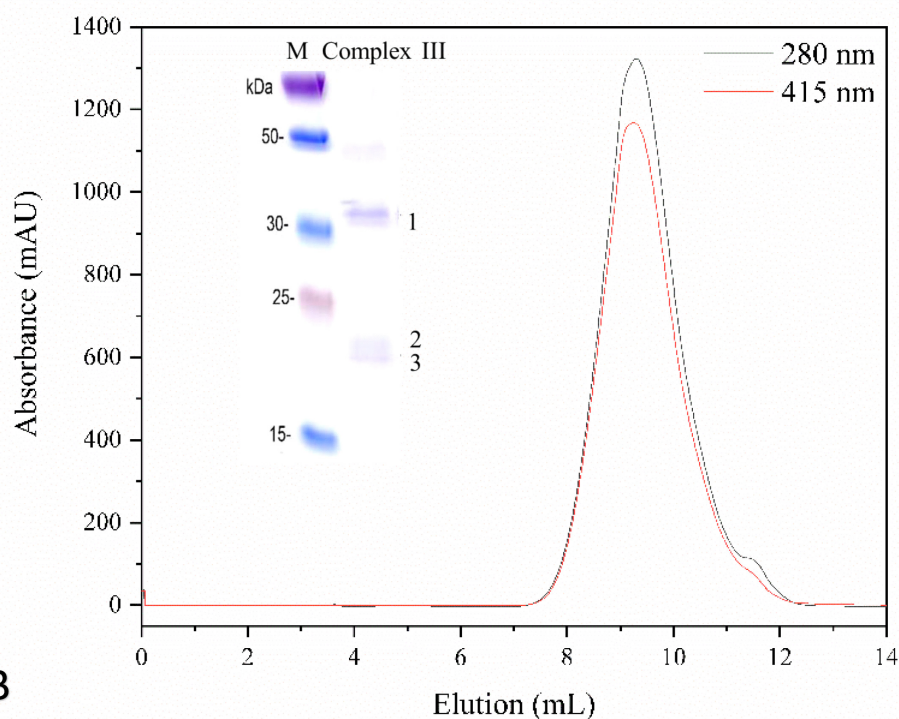

B

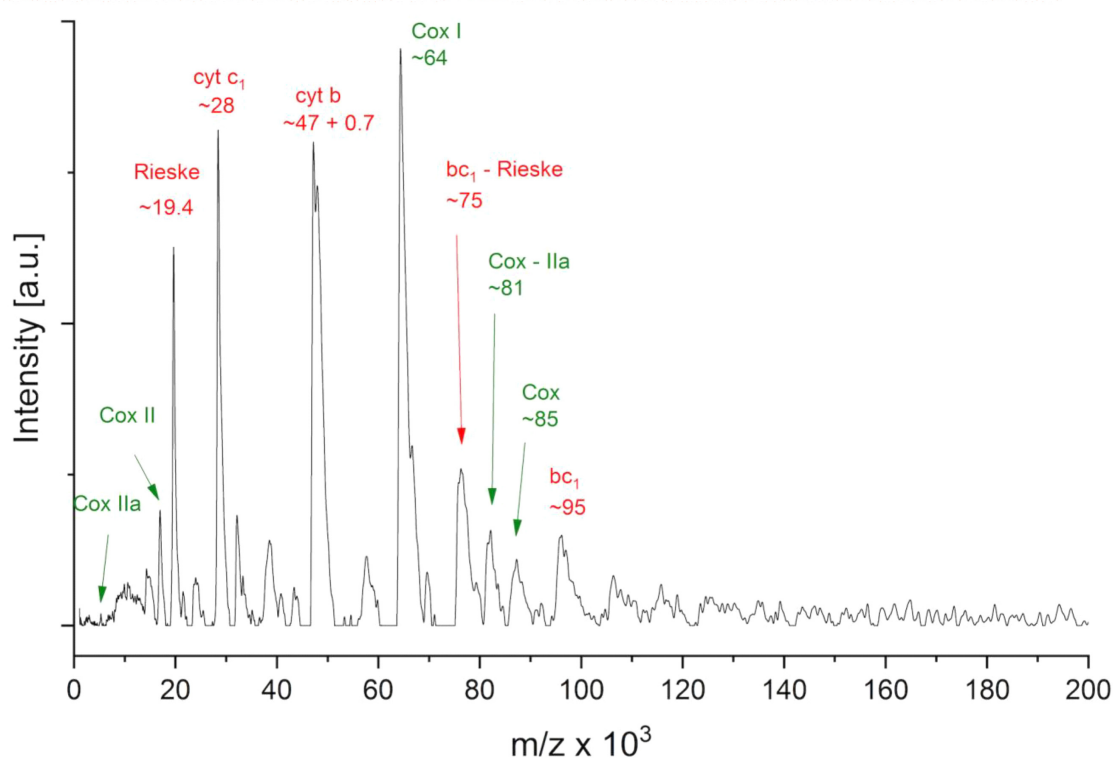

**Fig. S1. Identification of the cytochrome  $bc_1$  complex by LILBID-MS.** (A) Size exclusion chromatogram and subunit compositions on SDS-PAGE. SEC elution profile was monitored the absorbance at 280 nm (black) and 415 nm (red). (B) Mass positions of the native complexes, subcomplexes and subunits in the sample preparation. Only a monomer  $bc_1$  complex was identified, with a mass of 95 kDa. The sample also contains a monomer cytochrome c oxidase (Cox), the subcomplex -  $bc_1$  complex (missing rieske protein) and Cox (missing Cox IIa) with a molecular mass of 85 kDa, 75 kDa and 81 kDa, respectively. The subunits of Cytochrome  $bc_1$  complex are labeled as Rieske (19.4 kDa), Cyt  $c_1$  (27.6 kDa) and Cyt  $b$  (46.9 kDa). The Cox subunits were identified as well, with a mass of 63.9 kDa (Cox I), 16.8 kDa (Cox II), and 5.2 kDa (Cox IIa).

## SUPPORTING INFORMATION

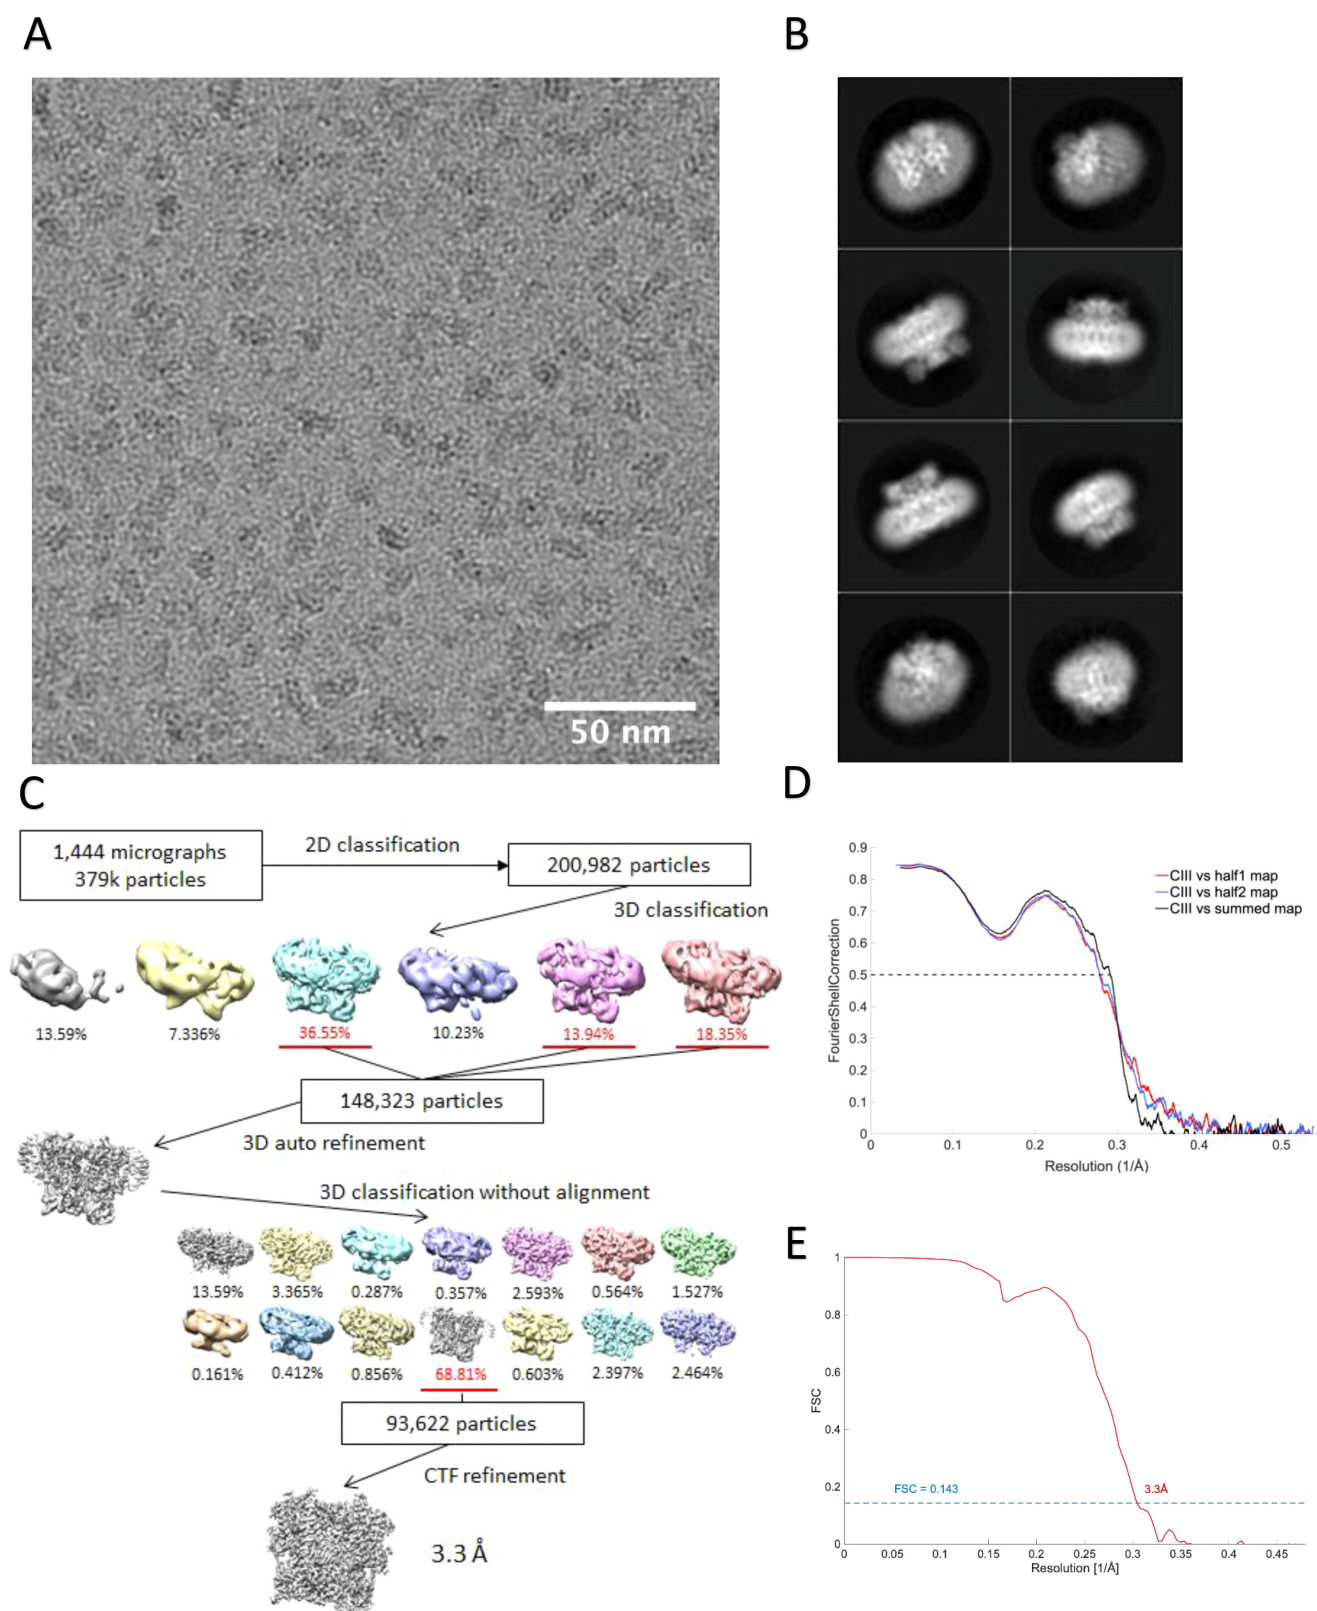

**Fig. S2. Structure determination of the cytochrome  $bc_1$  complex from *A. aeolicus*.** (A) Representative micrograph of the 1,444 micrographs. (B) Representative 2D class averages obtained from reference-free classification. (C) Workflow of 3D classification and reconstruction. (D) The map-to-model FSC curve. (E) Gold-standard FSC curves for the overall maps.

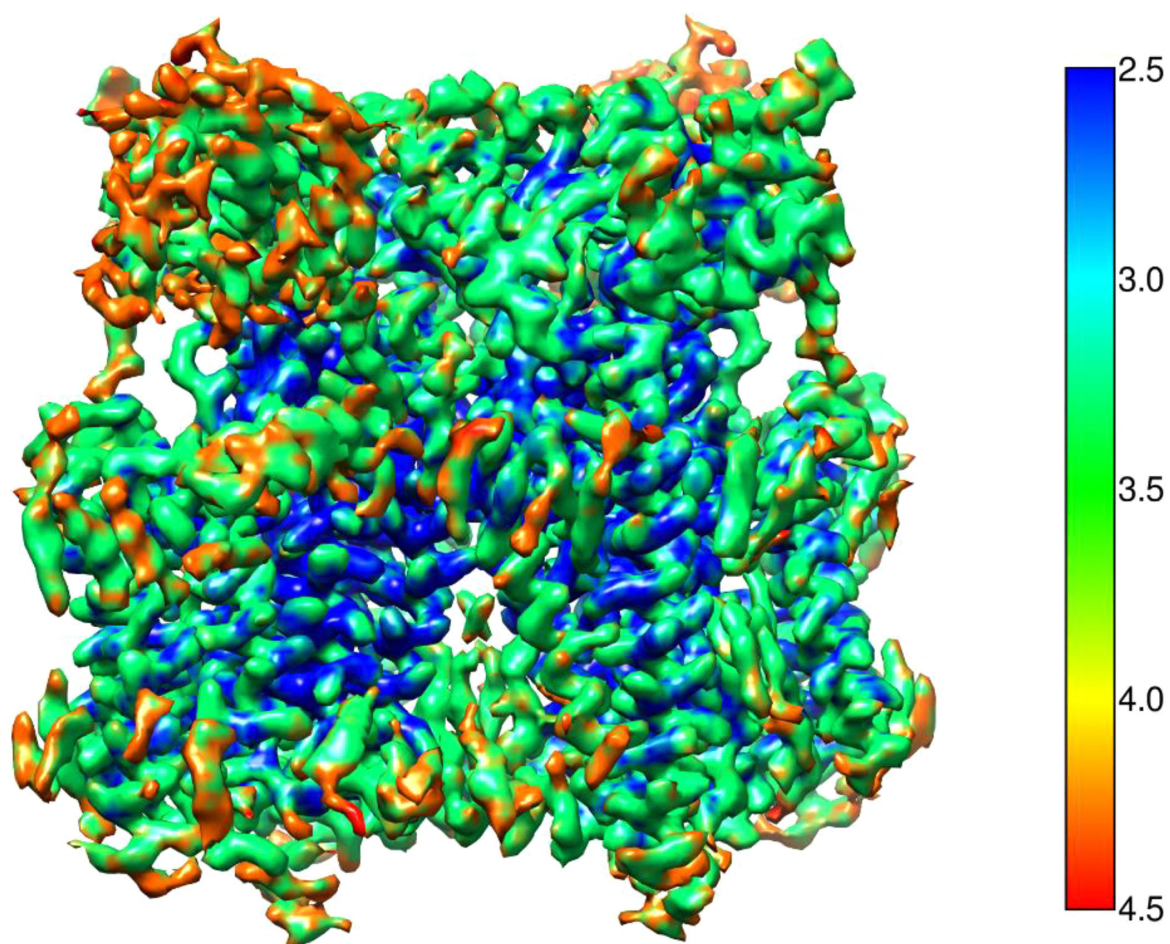

**Fig. S3.** Local resolution map of the final 3D density map (threshold: 0.035 in Chimera) of cytochrome bc<sub>1</sub> complex from *Aquifex aeolicus*. The local resolution is color-coded according to the scale bar, and the unit of number is angstrom.



## SUPPORTING INFORMATION

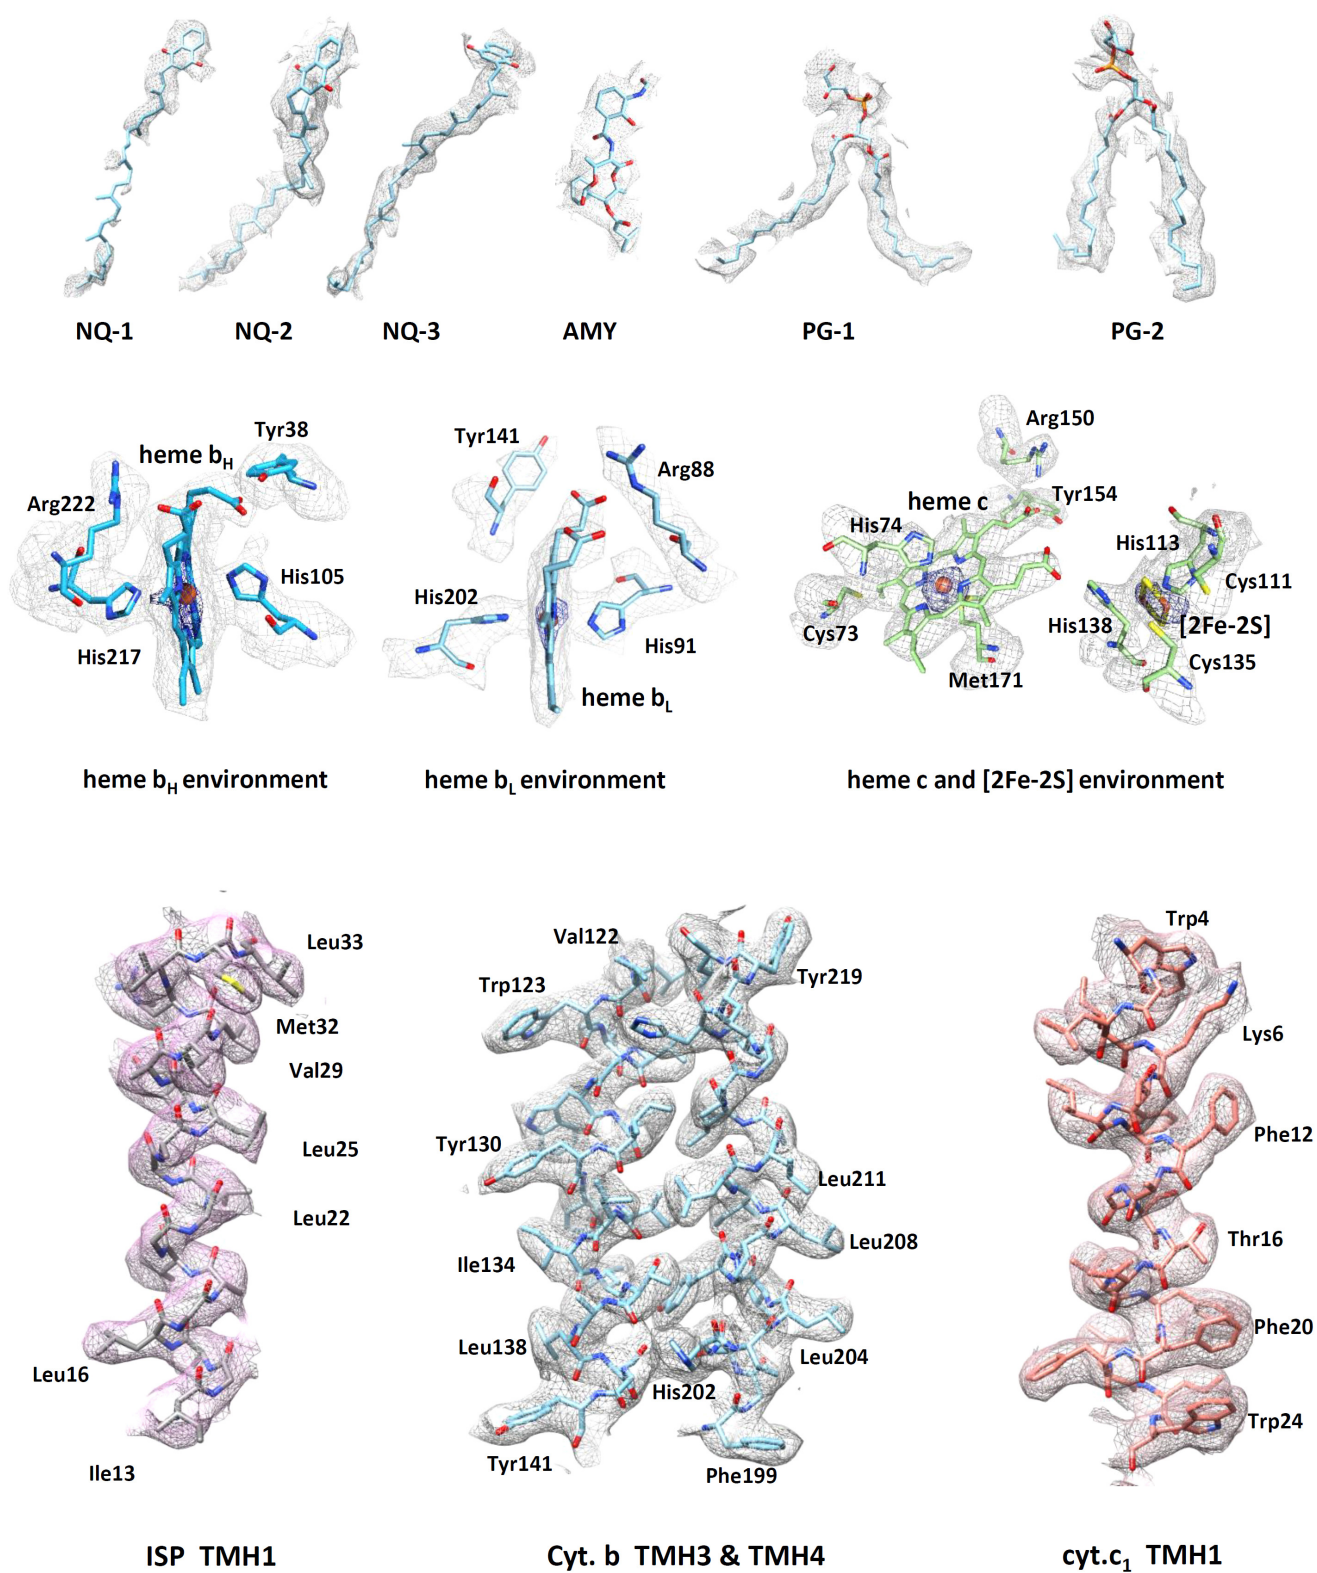

Fig. S4. Representative cryo-EM densities of the proteins and ligands of cytochrome  $bc_1$  complex from *Aquifex aeolicus*.

## SUPPORTING INFORMATION

**Movie. S1 (separate file). The overall map with model fitted. Views are sliced to show the overall quality of the map and model refinement.**

## References

- [1] G. H. Peng, G. Fritzsche, V. Zickermann, H. Schaagger, R. Mentele, F. Lottspeich, M. Bostina, M. Radermacher, R. Huber, K. O. Stetter, H. Michel, *Biochemistry* **2003**, *42*, 3032-3039.
- [2] L. Sokolova, I. Wittig, H. D. Barth, H. Schagger, B. Brutschy, U. Brandt, *Proteomics* **2010**, *10*, 1401-1407.
- [3] D. N. Mastrorade, *Journal of structural biology* **2005**, *152*, 36-51.
- [4] S. Q. Zheng, E. Palovcak, J.-P. Armache, K. A. Verba, Y. Cheng, D. A. Agard, *Nature methods* **2017**, *14*, 331.
- [5] A. Rohou, N. Grigorieff, *Journal of structural biology* **2015**, *192*, 216-221.
- [6] aS. H. W. Scheres, *Journal of Structural Biology* **2012**, *180*, 519-530; bD. Kimanius, B. O. Forsberg, S. H. Scheres, E. Lindahl, *Elife* **2016**, *5*, e18722.
- [7] G. Tang, L. Peng, P. R. Baldwin, D. S. Mann, W. Jiang, I. Rees, S. J. Ludtke, *Journal of structural biology* **2007**, *157*, 38-46.
- [8] A. Kucukelbir, F. J. Sigworth, H. D. Tagare, *Nat Methods* **2014**, *11*, 63-65.
- [9] T. Kleinschroth, M. Castellani, C. H. Trinh, N. Morgner, B. Brutschy, B. Ludwig, C. Hunte, *Biochim Biophys Acta* **2011**, *1807*, 1606-1615.
- [10] P. Emsley, K. Cowtan, *Acta Crystallogr D Biol Crystallogr* **2004**, *60*, 2126-2132.
- [11] P. D. Adams, P. V. Afonine, G. Bunkoczi, V. B. Chen, I. W. Davis, N. Echols, J. J. Headd, L. W. Hung, G. J. Kapral, R. W. Grosse-Kunstleve, A. J. McCoy, N. W. Moriarty, R. Oeffner, R. J. Read, D. C. Richardson, J. S. Richardson, T. C. Terwilliger, P. H. Zwart, *Acta Crystallogr D Biol Crystallogr* **2010**, *66*, 213-221.
- [12] Schrodinger, LLC, **2015**.
- [13] E. F. Pettersen, T. D. Goddard, C. C. Huang, G. S. Couch, D. M. Greenblatt, E. C. Meng, T. E. Ferrin, *J Comput Chem* **2004**, *25*, 1605-1612.

## Author Contributions

F. S., H. M. and G. P. initiated and supervised the project. G. Z., H. Z., S. Z., X. P., J. J., J. H., Y. Z. and G. P. performed all the experiments. G. Z. and S. Z. performed image processing and solved the cryo-EM structure. H. Z., G. Z., J. H., N. M., G. P. and Y. Z. analyzed the data and wrote the paper with substantial input from H. M. and F. S.

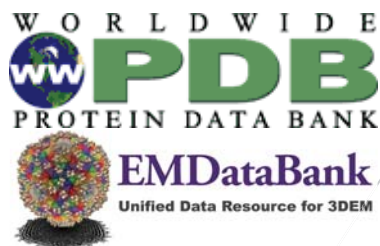

# Full wwPDB/EMDatabank EM Map/Model Validation Report

Aug 15, 2019 – 10:31 AM JST

PDB ID : 6KLS  
EMDB ID: : EMD-0716  
Title : Hyperthermophilic respiratory Complex III  
Deposited on : 2019-07-30  
Resolution : 3.30 Å (reported)

This is a Full wwPDB/EMDatabank EM Map/Model Validation Report.

This report is produced by the wwPDB biocuration pipeline after annotation of the structure.

We welcome your comments at [validation@mail.wwpdb.org](mailto:validation@mail.wwpdb.org)

A user guide is available at

<https://www.wwpdb.org/validation/2017/EMValidationReportHelp>

with specific help available everywhere you see the  symbol.

---

MolProbity : 4.02b-467  
Mogul : 1.8.0 (224370), CSD as540be (2019)  
Percentile statistics : 20171227.v01 (using entries in the PDB archive December 27th 2017)  
Ideal geometry (proteins) : Engh & Huber (2001)  
Ideal geometry (DNA, RNA) : Parkinson et. al. (1996)  
Validation Pipeline (wwPDB-VP) : 2.4

## 1 Overall quality at a glance i

The following experimental techniques were used to determine the structure:  
*ELECTRON MICROSCOPY*

The reported resolution of this entry is 3.30 Å.

Percentile scores (ranging between 0-100) for global validation metrics of the entry are shown in the following graphic. The table shows the number of entries on which the scores are based.

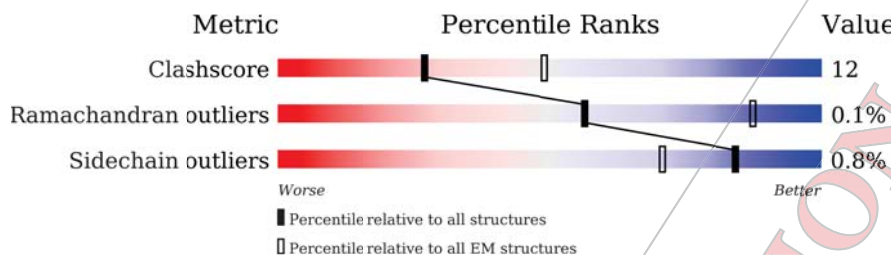

| Metric                | Whole archive (#Entries) | EM structures (#Entries) |
|-----------------------|--------------------------|--------------------------|
| Clashscore            | 136327                   | 1886                     |
| Ramachandran outliers | 132723                   | 1663                     |
| Sidechain outliers    | 132532                   | 1531                     |

The table below summarises the geometric issues observed across the polymeric chains. The red, orange, yellow and green segments on the bar indicate the fraction of residues that contain outliers for  $\geq 3$ , 2, 1 and 0 types of geometric quality criteria. A grey segment represents the fraction of residues that are not modelled. The numeric value for each fraction is indicated below the corresponding segment, with a dot representing fractions  $\leq 5\%$

| Mol | Chain | Length | Quality of chain                      |
|-----|-------|--------|---------------------------------------|
| 1   | A     | 181    | 51% (green), 23% (yellow), 26% (grey) |
| 1   | D     | 181    | 52% (green), 22% (yellow), 26% (grey) |
| 2   | B     | 410    | 73% (green), 23% (yellow), 4% (grey)  |
| 2   | E     | 410    | 73% (green), 23% (yellow), 4% (grey)  |
| 3   | C     | 240    | 70% (green), 28% (yellow), 2% (grey)  |
| 3   | F     | 240    | 72% (green), 26% (yellow), 2% (grey)  |

The following table lists non-polymeric compounds, carbohydrate monomers and non-standard residues in protein, DNA, RNA chains that are outliers for geometric or electron-density-fit criteria:

| Mol | Type | Chain | Res | Chirality | Geometry | Clashes | Electron density |
|-----|------|-------|-----|-----------|----------|---------|------------------|
| 6   | DLX  | B     | 504 | -         | X        | -       | -                |
| 6   | DLX  | C     | 301 | -         | X        | -       | -                |
| 6   | DLX  | E     | 504 | -         | X        | -       | -                |
| 6   | DLX  | F     | 301 | -         | X        | -       | -                |

## 2 Entry composition i

There are 8 unique types of molecules in this entry. The entry contains 13011 atoms, of which 0 are hydrogens and 0 are deuteriums.

In the tables below, the AltConf column contains the number of residues with at least one atom in alternate conformation and the Trace column contains the number of residues modelled with at most 2 atoms.

- Molecule 1 is a protein called Rieske-I iron sulfur protein.

| Mol | Chain | Residues | Atoms |     |     |     | AltConf | Trace |   |
|-----|-------|----------|-------|-----|-----|-----|---------|-------|---|
|     |       |          | Total | C   | N   | O   |         |       | S |
| 1   | A     | 134      | Total | C   | N   | O   | S       | 0     | 0 |
|     |       |          | 1012  | 668 | 169 | 169 | 6       |       |   |
| 1   | D     | 134      | Total | C   | N   | O   | S       | 0     | 0 |
|     |       |          | 1012  | 668 | 169 | 169 | 6       |       |   |

- Molecule 2 is a protein called cytochrome b subunit.

| Mol | Chain | Residues | Atoms |      |     |     | AltConf | Trace |   |
|-----|-------|----------|-------|------|-----|-----|---------|-------|---|
|     |       |          | Total | C    | N   | O   |         |       | S |
| 2   | B     | 395      | Total | C    | N   | O   | S       | 0     | 0 |
|     |       |          | 3226  | 2208 | 491 | 515 | 12      |       |   |
| 2   | E     | 395      | Total | C    | N   | O   | S       | 0     | 0 |
|     |       |          | 3226  | 2208 | 491 | 515 | 12      |       |   |

- Molecule 3 is a protein called Cytochrome c.

| Mol | Chain | Residues | Atoms |      |     |     | AltConf | Trace |   |
|-----|-------|----------|-------|------|-----|-----|---------|-------|---|
|     |       |          | Total | C    | N   | O   |         |       | S |
| 3   | C     | 236      | Total | C    | N   | O   | S       | 0     | 0 |
|     |       |          | 1917  | 1263 | 312 | 334 | 8       |       |   |
| 3   | F     | 236      | Total | C    | N   | O   | S       | 0     | 0 |
|     |       |          | 1917  | 1263 | 312 | 334 | 8       |       |   |

- Molecule 4 is FE2/S2 (INORGANIC) CLUSTER (three-letter code: FES) (formula: Fe<sub>2</sub>S<sub>2</sub>).

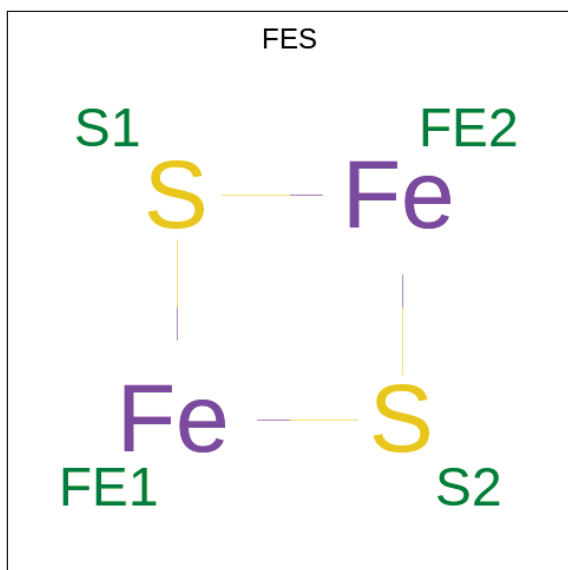

| Mol | Chain | Residues | Atoms |    |   | AltConf |
|-----|-------|----------|-------|----|---|---------|
| 4   | A     | 1        | Total | Fe | S | 0       |
|     |       |          | 4     | 2  | 2 |         |
| 4   | D     | 1        | Total | Fe | S | 0       |
|     |       |          | 4     | 2  | 2 |         |

- Molecule 5 is PROTOPORPHYRIN IX CONTAINING FE (three-letter code: HEM) (formula:  $C_{34}H_{32}FeN_4O_4$ ).

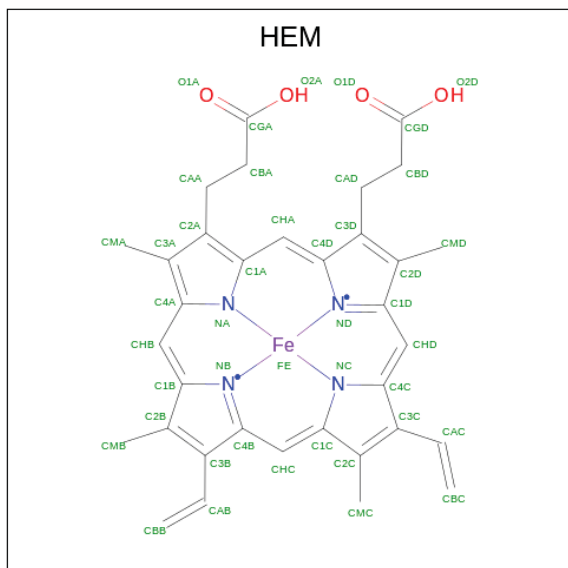

| Mol | Chain | Residues | Atoms |    |    |   | AltConf |   |
|-----|-------|----------|-------|----|----|---|---------|---|
| 5   | B     | 1        | Total | C  | Fe | N | O       | 0 |
|     |       |          | 86    | 68 | 2  | 8 | 8       |   |

Continued on next page...

Continued from previous page...

| Mol | Chain | Residues | Atoms |    |    |   |   | AltConf |
|-----|-------|----------|-------|----|----|---|---|---------|
|     |       |          | Total | C  | Fe | N | O |         |
| 5   | B     | 1        | 86    | 68 | 2  | 8 | 8 | 0       |
| 5   | E     | 1        | 86    | 68 | 2  | 8 | 8 | 0       |
| 5   | E     | 1        | 86    | 68 | 2  | 8 | 8 | 0       |

- Molecule 6 is 2-[(2 {E},6 {E},10 {Z},14 {Z},18 {Z},23 {R})-3,7,11,15,19,23,27-heptamethyl octacos-2,6,10,14,18-pentaenyl]naphthalene-1,4-dione (three-letter code: DLX) (formula: C<sub>45</sub>H<sub>66</sub>O<sub>2</sub>).

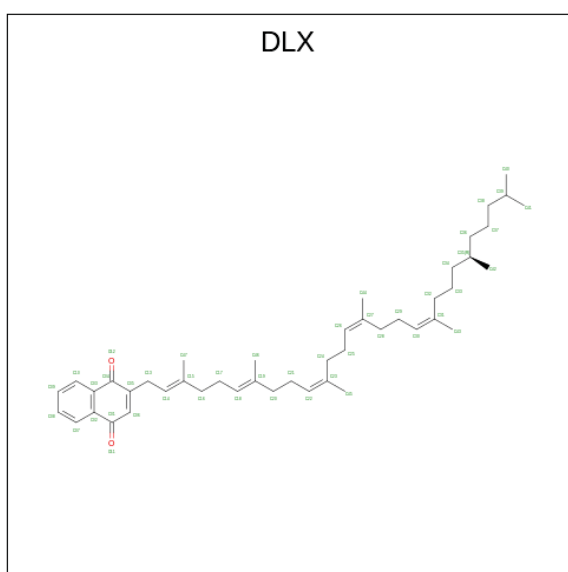

| Mol | Chain | Residues | Atoms |    |   | AltConf |
|-----|-------|----------|-------|----|---|---------|
|     |       |          | Total | C  | O |         |
| 6   | B     | 1        | 94    | 90 | 4 | 0       |
| 6   | B     | 1        | 94    | 90 | 4 | 0       |
| 6   | C     | 1        | 47    | 45 | 2 | 0       |
| 6   | E     | 1        | 94    | 90 | 4 | 0       |
| 6   | E     | 1        | 94    | 90 | 4 | 0       |
| 6   | F     | 1        | 47    | 45 | 2 | 0       |

- Molecule 7 is (1R)-2-[[[(2S)-2,3-DIHYDROXYPROPYL]OXY}(HYDROXY)PHOSPHORYL]OXY}-1-[(PALMITOYLOXY)METHYL]ETHYL (11E)-OCTADEC-11-ENOATE



(three-letter code: PGV) (formula:  $C_{40}H_{77}O_{10}P$ ).

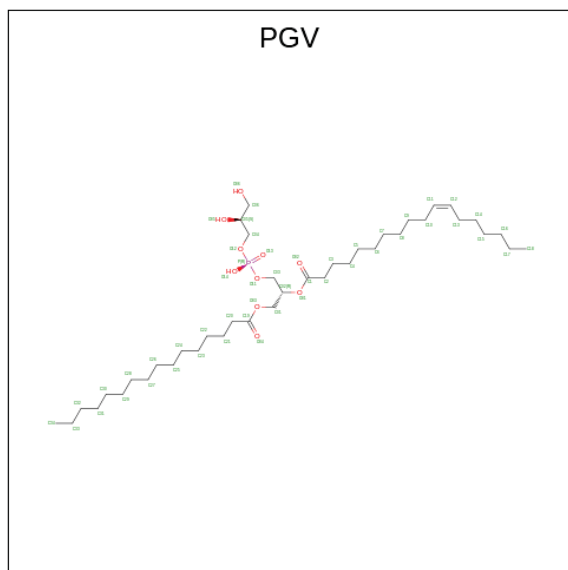

| Mol | Chain | Residues | Atoms |    |    |   | AltConf |
|-----|-------|----------|-------|----|----|---|---------|
|     |       |          | Total | C  | O  | P |         |
| 7   | B     | 1        | Total | C  | O  | P | 0       |
|     |       |          | 102   | 80 | 20 | 2 |         |
| 7   | B     | 1        | Total | C  | O  | P | 0       |
|     |       |          | 102   | 80 | 20 | 2 |         |
| 7   | E     | 1        | Total | C  | O  | P | 0       |
|     |       |          | 51    | 40 | 10 | 1 |         |

- Molecule 8 is HEME C (three-letter code: HEC) (formula:  $C_{34}H_{34}FeN_4O_4$ ).

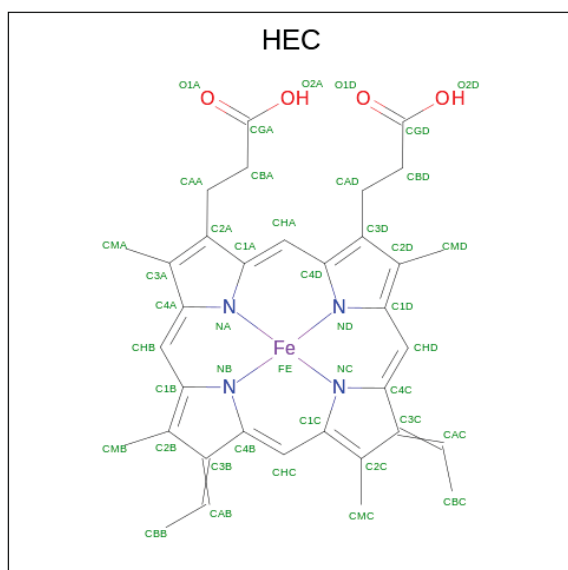

| Mol | Chain | Residues | Atoms       |         |         |        | AltConf |   |
|-----|-------|----------|-------------|---------|---------|--------|---------|---|
|     |       |          | Total       | C       | Fe      | N      |         | O |
| 8   | C     | 1        | Total<br>43 | C<br>34 | Fe<br>1 | N<br>4 | O<br>4  | 0 |
| 8   | F     | 1        | Total<br>43 | C<br>34 | Fe<br>1 | N<br>4 | O<br>4  | 0 |

CONFIDENTIAL VALIDATION REPORT

### 3 Residue-property plots

These plots are drawn for all protein, RNA and DNA chains in the entry. The first graphic for a chain summarises the proportions of the various outlier classes displayed in the second graphic. The second graphic shows the sequence view annotated by issues in geometry. Residues are color-coded according to the number of geometric quality criteria for which they contain at least one outlier: green = 0, yellow = 1, orange = 2 and red = 3 or more. Stretches of 2 or more consecutive residues without any outlier are shown as a green connector. Residues present in the sample, but not in the model, are shown in grey.

- Molecule 1: Rieske-I iron sulfur protein

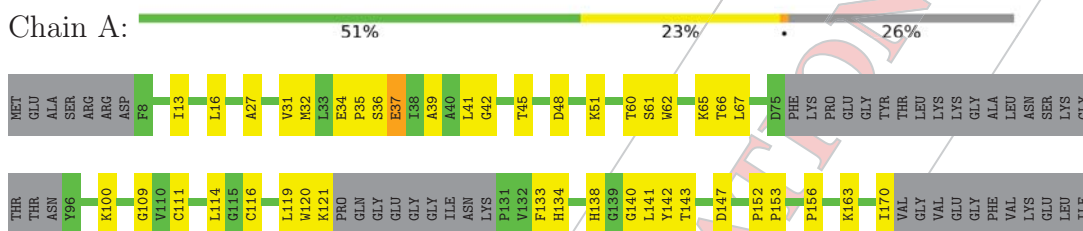

- Molecule 1: Rieske-I iron sulfur protein

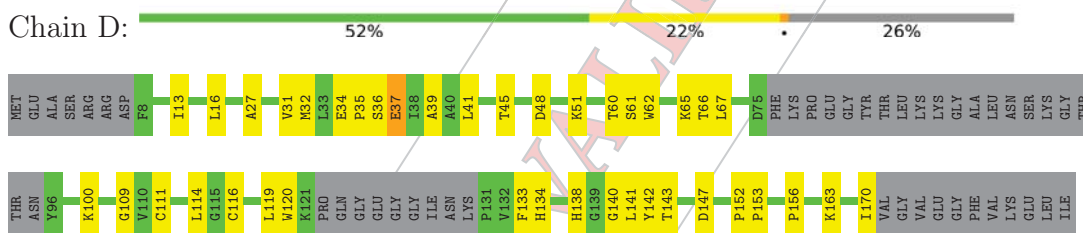

- Molecule 2: cytochrome b subunit

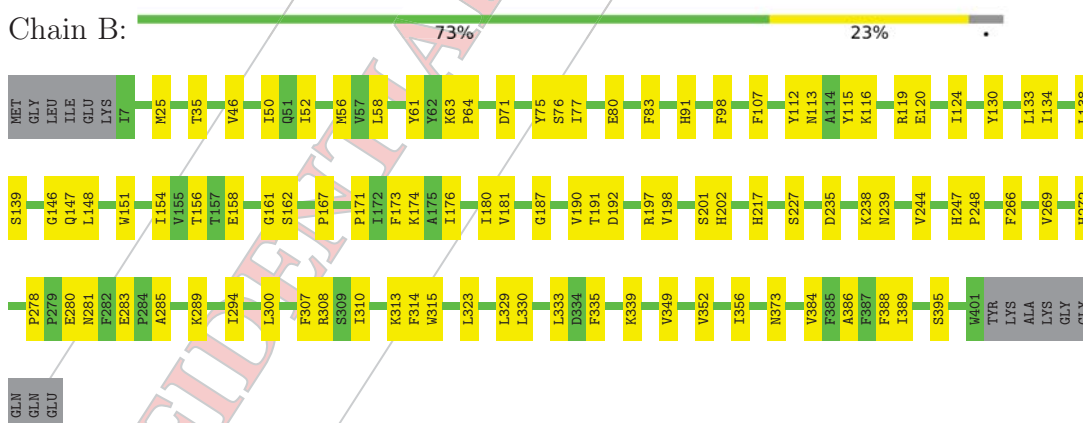

- Molecule 2: cytochrome b subunit

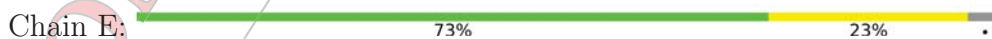

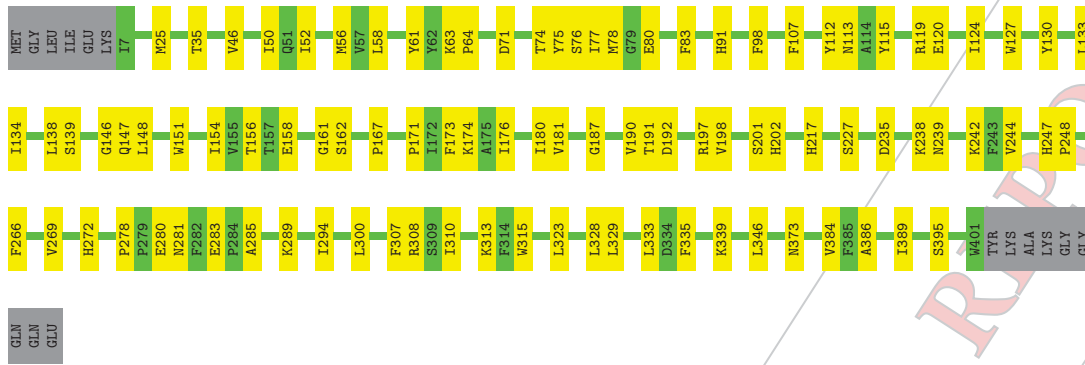

• Molecule 3: Cytochrome c

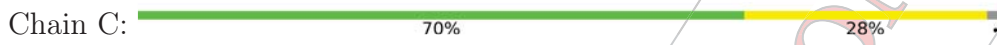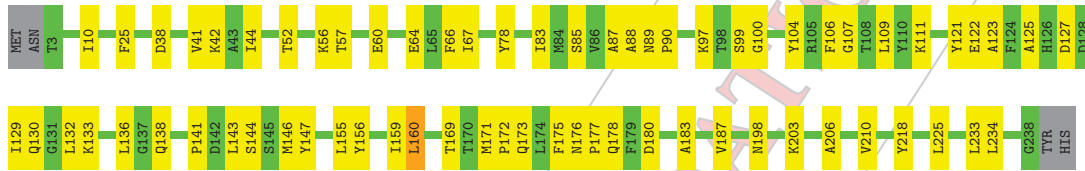

• Molecule 3: Cytochrome c

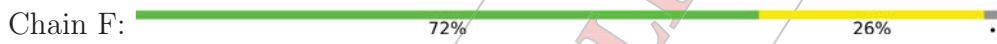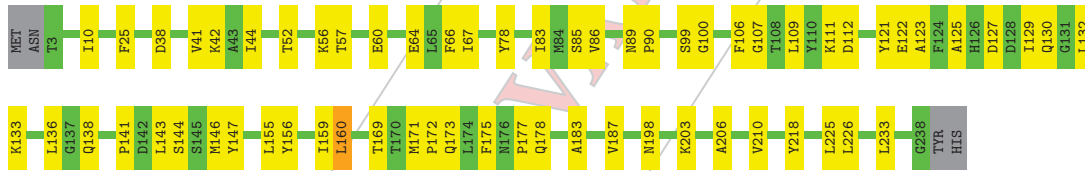

CONFIDENTIAL

## 4 Experimental information

| Property                             | Value                     | Source    |
|--------------------------------------|---------------------------|-----------|
| Reconstruction method                | SINGLE PARTICLE           | Depositor |
| Imposed symmetry                     | POINT, Not provided       | Depositor |
| Number of particles used             | 93622                     | Depositor |
| Resolution determination method      | FSC 0.143 CUT-OFF         | Depositor |
| CTF correction method                | NONE                      | Depositor |
| Microscope                           | FEI TITAN KRIOS           | Depositor |
| Voltage (kV)                         | 300                       | Depositor |
| Electron dose ( $e^-/\text{\AA}^2$ ) | 60                        | Depositor |
| Minimum defocus (nm)                 | Not provided              | Depositor |
| Maximum defocus (nm)                 | Not provided              | Depositor |
| Magnification                        | Not provided              | Depositor |
| Image detector                       | GATAN K2 SUMMIT (4k x 4k) | Depositor |

## 5 Model quality [i](#)

### 5.1 Standard geometry [i](#)

Bond lengths and bond angles in the following residue types are not validated in this section: PGV, HEM, DLX, FES, HEC

The Z score for a bond length (or angle) is the number of standard deviations the observed value is removed from the expected value. A bond length (or angle) with  $|Z| > 5$  is considered an outlier worth inspection. RMSZ is the root-mean-square of all Z scores of the bond lengths (or angles).

| Mol | Chain | Bond lengths |         | Bond angles |         |
|-----|-------|--------------|---------|-------------|---------|
|     |       | RMSZ         | # Z  >2 | RMSZ        | # Z  >2 |
| 1   | A     | 0.26         | 0/1039  | 0.48        | 0/1410  |
| 1   | D     | 0.26         | 0/1039  | 0.48        | 0/1410  |
| 2   | B     | 0.28         | 0/3346  | 0.44        | 0/4570  |
| 2   | E     | 0.28         | 0/3346  | 0.44        | 0/4570  |
| 3   | C     | 0.27         | 0/1974  | 0.48        | 0/2674  |
| 3   | F     | 0.27         | 0/1974  | 0.48        | 0/2674  |
| All | All   | 0.27         | 0/12718 | 0.46        | 0/17308 |

There are no bond length outliers.

There are no bond angle outliers.

There are no chirality outliers.

There are no planarity outliers.

### 5.2 Too-close contacts [i](#)

In the following table, the Non-H and H(model) columns list the number of non-hydrogen atoms and hydrogen atoms in the chain respectively. The H(added) column lists the number of hydrogen atoms added and optimized by MolProbity. The Clashes column lists the number of clashes within the asymmetric unit, whereas Symm-Clashes lists symmetry related clashes.

| Mol | Chain | Non-H | H(model) | H(added) | Clashes | Symm-Clashes |
|-----|-------|-------|----------|----------|---------|--------------|
| 1   | A     | 1012  | 0        | 1057     | 36      | 0            |
| 1   | D     | 1012  | 0        | 1057     | 32      | 0            |
| 2   | B     | 3226  | 0        | 3280     | 66      | 0            |
| 2   | E     | 3226  | 0        | 3280     | 65      | 0            |
| 3   | C     | 1917  | 0        | 1929     | 49      | 0            |
| 3   | F     | 1917  | 0        | 1929     | 48      | 0            |
| 4   | A     | 4     | 0        | 0        | 1       | 0            |

*Continued on next page...*

Continued from previous page...

| Mol | Chain | Non-H | H(model) | H(added) | Clashes | Symm-Clashes |
|-----|-------|-------|----------|----------|---------|--------------|
| 4   | D     | 4     | 0        | 0        | 1       | 0            |
| 5   | B     | 86    | 0        | 60       | 7       | 0            |
| 5   | E     | 86    | 0        | 60       | 7       | 0            |
| 6   | B     | 94    | 0        | 0        | 13      | 0            |
| 6   | C     | 47    | 0        | 0        | 0       | 0            |
| 6   | E     | 94    | 0        | 0        | 8       | 0            |
| 6   | F     | 47    | 0        | 0        | 0       | 0            |
| 7   | B     | 102   | 0        | 151      | 15      | 0            |
| 7   | E     | 51    | 0        | 75       | 1       | 0            |
| 8   | C     | 43    | 0        | 29       | 9       | 0            |
| 8   | F     | 43    | 0        | 29       | 8       | 0            |
| All | All   | 13011 | 0        | 12936    | 305     | 0            |

The all-atom clashscore is defined as the number of clashes found per 1000 atoms (including hydrogen atoms). The all-atom clashscore for this structure is 12.

All (305) close contacts within the same asymmetric unit are listed below, sorted by their clash magnitude.

| Atom-1           | Atom-2           | Interatomic distance (Å) | Clash overlap (Å) |
|------------------|------------------|--------------------------|-------------------|
| 6:B:503:DLX:C23  | 7:B:506:PGV:H341 | 1.90                     | 1.01              |
| 3:F:159:ILE:CD1  | 8:F:302:HEC:HMB2 | 1.99                     | 0.93              |
| 3:C:159:ILE:CD1  | 8:C:302:HEC:HMB2 | 1.98                     | 0.93              |
| 3:C:159:ILE:HD13 | 8:C:302:HEC:HMB2 | 1.53                     | 0.89              |
| 3:F:159:ILE:HD13 | 8:F:302:HEC:HMB2 | 1.54                     | 0.89              |
| 6:B:503:DLX:C24  | 7:B:506:PGV:C33  | 2.60                     | 0.80              |
| 5:B:501:HEM:HHC  | 5:B:501:HEM:HBB2 | 1.66                     | 0.77              |
| 5:E:501:HEM:HBB2 | 5:E:501:HEM:HHC  | 1.66                     | 0.76              |
| 1:A:48:ASP:HB3   | 1:A:51:LYS:HG3   | 1.67                     | 0.74              |
| 1:D:48:ASP:HB3   | 1:D:51:LYS:HG3   | 1.67                     | 0.74              |
| 2:E:238:LYS:HD3  | 2:E:239:ASN:H    | 1.53                     | 0.74              |
| 5:B:501:HEM:HBC2 | 5:B:501:HEM:HHD  | 1.70                     | 0.73              |
| 2:E:335:PHE:O    | 2:E:395:SER:OG   | 2.06                     | 0.73              |
| 2:B:335:PHE:O    | 2:B:395:SER:OG   | 2.06                     | 0.73              |
| 5:E:501:HEM:HHD  | 5:E:501:HEM:HBC2 | 1.70                     | 0.73              |
| 2:B:238:LYS:HD3  | 2:B:239:ASN:H    | 1.52                     | 0.73              |
| 3:F:159:ILE:HD11 | 8:F:302:HEC:HMB2 | 1.75                     | 0.69              |
| 2:E:167:PRO:HD2  | 2:E:171:PRO:HA   | 1.75                     | 0.68              |
| 2:B:167:PRO:HD2  | 2:B:171:PRO:HA   | 1.75                     | 0.66              |
| 2:B:248:PRO:HG3  | 3:C:233:LEU:HD22 | 1.77                     | 0.66              |
| 1:A:140:GLY:HA2  | 1:A:152:PRO:HD2  | 1.78                     | 0.66              |
| 3:C:159:ILE:HD11 | 8:C:302:HEC:HMB2 | 1.74                     | 0.65              |

Continued on next page...

Continued from previous page...

| Atom-1           | Atom-2           | Interatomic distance (Å) | Clash overlap (Å) |
|------------------|------------------|--------------------------|-------------------|
| 6:B:503:DLX:C24  | 7:B:506:PGV:H331 | 2.25                     | 0.65              |
| 2:E:248:PRO:HG3  | 3:F:233:LEU:HD22 | 1.77                     | 0.65              |
| 3:F:129:ILE:HD11 | 3:F:133:LYS:HB3  | 1.78                     | 0.65              |
| 2:E:310:ILE:HG21 | 2:E:315:TRP:HD1  | 1.62                     | 0.65              |
| 3:F:177:PRO:O    | 3:F:178:GLN:HG2  | 1.97                     | 0.64              |
| 1:D:140:GLY:HA2  | 1:D:152:PRO:HD2  | 1.78                     | 0.64              |
| 1:D:62:TRP:HB2   | 1:D:67:LEU:HD22  | 1.79                     | 0.64              |
| 3:C:129:ILE:HD11 | 3:C:133:LYS:HB3  | 1.78                     | 0.64              |
| 2:B:310:ILE:HG21 | 2:B:315:TRP:HD1  | 1.62                     | 0.64              |
| 3:C:177:PRO:O    | 3:C:178:GLN:HG2  | 1.97                     | 0.64              |
| 3:C:169:THR:HG22 | 3:C:171:MET:H    | 1.62                     | 0.64              |
| 1:A:134:HIS:HB3  | 1:A:141:LEU:HD23 | 1.79                     | 0.64              |
| 1:A:62:TRP:HB2   | 1:A:67:LEU:HD22  | 1.79                     | 0.64              |
| 1:D:134:HIS:HB3  | 1:D:141:LEU:HD23 | 1.79                     | 0.63              |
| 7:B:506:PGV:H171 | 6:E:503:DLX:C24  | 2.29                     | 0.63              |
| 3:C:41:VAL:HG23  | 3:C:42:LYS:H     | 1.62                     | 0.62              |
| 3:F:169:THR:HG22 | 3:F:171:MET:H    | 1.62                     | 0.62              |
| 3:F:41:VAL:HG23  | 3:F:42:LYS:H     | 1.63                     | 0.62              |
| 1:D:13:ILE:HG22  | 3:F:225:LEU:HB3  | 1.82                     | 0.62              |
| 3:C:160:LEU:HB3  | 3:C:187:VAL:HG21 | 1.81                     | 0.62              |
| 3:F:160:LEU:HB3  | 3:F:187:VAL:HG21 | 1.81                     | 0.61              |
| 1:A:13:ILE:HG22  | 3:C:225:LEU:HB3  | 1.82                     | 0.61              |
| 6:B:503:DLX:C45  | 7:B:506:PGV:H341 | 2.30                     | 0.60              |
| 7:B:506:PGV:H183 | 6:E:503:DLX:C46  | 2.32                     | 0.59              |
| 2:B:162:SER:HB2  | 2:B:313:LYS:HB3  | 1.85                     | 0.59              |
| 6:B:503:DLX:C23  | 7:B:506:PGV:C34  | 2.75                     | 0.59              |
| 2:E:162:SER:HB2  | 2:E:313:LYS:HB3  | 1.85                     | 0.59              |
| 2:B:113:ASN:ND2  | 2:B:339:LYS:O    | 2.32                     | 0.58              |
| 2:E:113:ASN:ND2  | 2:E:339:LYS:O    | 2.32                     | 0.58              |
| 2:B:187:GLY:HA3  | 1:D:39:ALA:HB1   | 1.85                     | 0.58              |
| 5:B:502:HEM:HBC2 | 5:B:502:HEM:HMC2 | 1.84                     | 0.58              |
| 1:D:34:GLU:OE2   | 1:D:36:SER:OG    | 2.21                     | 0.58              |
| 3:C:147:TYR:HB3  | 3:C:198:ASN:HD22 | 1.69                     | 0.58              |
| 3:C:160:LEU:O    | 3:C:173:GLN:NE2  | 2.37                     | 0.58              |
| 1:A:34:GLU:OE2   | 1:A:36:SER:OG    | 2.21                     | 0.57              |
| 3:F:147:TYR:HB3  | 3:F:198:ASN:HD22 | 1.69                     | 0.57              |
| 3:F:160:LEU:O    | 3:F:173:GLN:NE2  | 2.37                     | 0.57              |
| 1:D:31:VAL:HG22  | 2:E:83:PHE:HB2   | 1.87                     | 0.57              |
| 2:B:238:LYS:HD3  | 2:B:239:ASN:N    | 2.19                     | 0.57              |
| 2:E:154:ILE:O    | 2:E:158:GLU:HG2  | 2.05                     | 0.57              |
| 2:B:154:ILE:O    | 2:B:158:GLU:HG2  | 2.05                     | 0.56              |

Continued on next page...



Continued from previous page...

| Atom-1           | Atom-2           | Interatomic distance (Å) | Clash overlap (Å) |
|------------------|------------------|--------------------------|-------------------|
| 2:B:192:ASP:OD1  | 2:E:63:LYS:HE3   | 2.05                     | 0.56              |
| 1:D:27:ALA:O     | 1:D:31:VAL:HG23  | 2.06                     | 0.56              |
| 1:A:39:ALA:HB1   | 2:E:187:GLY:HA3  | 1.87                     | 0.56              |
| 1:D:35:PRO:HB2   | 1:D:39:ALA:HB2   | 1.87                     | 0.56              |
| 1:A:35:PRO:HB2   | 1:A:39:ALA:HB2   | 1.87                     | 0.56              |
| 6:B:503:DLX:C24  | 7:B:506:PGV:H332 | 2.34                     | 0.56              |
| 1:A:31:VAL:HG22  | 2:B:83:PHE:HB2   | 1.87                     | 0.56              |
| 1:A:60:THR:HG22  | 1:A:61:SER:H     | 1.71                     | 0.55              |
| 1:A:27:ALA:O     | 1:A:31:VAL:HG23  | 2.06                     | 0.55              |
| 2:E:238:LYS:HD3  | 2:E:239:ASN:N    | 2.19                     | 0.55              |
| 2:B:63:LYS:HE3   | 2:E:192:ASP:OD1  | 2.06                     | 0.55              |
| 2:E:148:LEU:HD23 | 2:E:280:GLU:HG2  | 1.88                     | 0.55              |
| 6:E:503:DLX:C44  | 6:E:503:DLX:C30  | 2.85                     | 0.55              |
| 2:B:181:VAL:HA   | 2:B:187:GLY:HA2  | 1.89                     | 0.54              |
| 1:D:60:THR:HG22  | 1:D:61:SER:H     | 1.71                     | 0.54              |
| 1:D:138:HIS:HB2  | 4:D:501:FES:S2   | 2.48                     | 0.54              |
| 2:B:148:LEU:HD23 | 2:B:280:GLU:HG2  | 1.88                     | 0.54              |
| 6:B:503:DLX:C30  | 6:B:503:DLX:C44  | 2.85                     | 0.54              |
| 6:E:503:DLX:C26  | 6:E:503:DLX:C45  | 2.85                     | 0.54              |
| 1:A:138:HIS:HB2  | 4:A:501:FES:S2   | 2.48                     | 0.53              |
| 3:C:175:PHE:HB3  | 3:C:183:ALA:HB1  | 1.90                     | 0.53              |
| 2:E:181:VAL:HA   | 2:E:187:GLY:HA2  | 1.88                     | 0.53              |
| 3:C:52:THR:OG1   | 3:C:56:LYS:O     | 2.24                     | 0.53              |
| 2:B:35:THR:HG21  | 2:B:112:TYR:OH   | 2.09                     | 0.53              |
| 2:E:35:THR:HG21  | 2:E:112:TYR:OH   | 2.09                     | 0.53              |
| 2:B:138:LEU:HD11 | 2:B:156:THR:HG21 | 1.90                     | 0.53              |
| 3:F:175:PHE:HB3  | 3:F:183:ALA:HB1  | 1.90                     | 0.53              |
| 6:B:503:DLX:C45  | 6:B:503:DLX:C26  | 2.85                     | 0.52              |
| 1:D:41:LEU:HD11  | 3:F:111:LYS:HE3  | 1.91                     | 0.52              |
| 2:E:76:SER:HA    | 2:E:80:GLU:HB2   | 1.90                     | 0.52              |
| 2:E:138:LEU:HD11 | 2:E:156:THR:HG21 | 1.91                     | 0.52              |
| 2:B:139:SER:OG   | 2:B:202:HIS:HB2  | 2.09                     | 0.52              |
| 2:B:76:SER:HA    | 2:B:80:GLU:HB2   | 1.90                     | 0.52              |
| 2:E:139:SER:OG   | 2:E:202:HIS:HB2  | 2.09                     | 0.52              |
| 3:C:172:PRO:HD3  | 8:C:302:HEC:HBC3 | 1.92                     | 0.52              |
| 1:D:114:LEU:HD12 | 1:D:138:HIS:NE2  | 2.25                     | 0.52              |
| 3:F:52:THR:OG1   | 3:F:56:LYS:O     | 2.24                     | 0.51              |
| 1:A:41:LEU:HD11  | 3:C:111:LYS:HE3  | 1.91                     | 0.51              |
| 1:A:114:LEU:HD12 | 1:A:138:HIS:NE2  | 2.25                     | 0.51              |
| 2:B:161:GLY:HA3  | 2:B:180:ILE:HD11 | 1.93                     | 0.51              |
| 2:B:138:LEU:HD12 | 2:B:300:LEU:HD11 | 1.92                     | 0.51              |

Continued on next page...

Continued from previous page...

| Atom-1           | Atom-2           | Interatomic distance (Å) | Clash overlap (Å) |
|------------------|------------------|--------------------------|-------------------|
| 3:F:83:ILE:O     | 3:F:89:ASN:HB2   | 2.11                     | 0.51              |
| 3:C:83:ILE:O     | 3:C:89:ASN:HB2   | 2.11                     | 0.50              |
| 2:E:173:PHE:HA   | 2:E:176:ILE:HG12 | 1.94                     | 0.50              |
| 5:E:502:HEM:HMC1 | 5:E:502:HEM:HBC2 | 1.93                     | 0.50              |
| 3:F:172:PRO:HD3  | 8:F:302:HEC:HBC3 | 1.92                     | 0.50              |
| 2:E:154:ILE:HD11 | 2:E:190:VAL:HG21 | 1.93                     | 0.50              |
| 2:E:138:LEU:HD12 | 2:E:300:LEU:HD11 | 1.92                     | 0.50              |
| 2:E:91:HIS:NE2   | 5:E:501:HEM:ND   | 2.60                     | 0.50              |
| 6:B:503:DLX:C24  | 7:B:506:PGV:H341 | 2.41                     | 0.50              |
| 2:B:173:PHE:HA   | 2:B:176:ILE:HG12 | 1.94                     | 0.50              |
| 2:B:91:HIS:NE2   | 5:B:501:HEM:ND   | 2.60                     | 0.50              |
| 2:E:161:GLY:HA3  | 2:E:180:ILE:HD11 | 1.93                     | 0.49              |
| 6:B:503:DLX:C42  | 6:B:503:DLX:C32  | 2.90                     | 0.49              |
| 2:B:154:ILE:HD11 | 2:B:190:VAL:HG21 | 1.93                     | 0.49              |
| 2:B:272:HIS:CE1  | 3:C:25:PHE:HB3   | 2.48                     | 0.49              |
| 6:E:503:DLX:C42  | 6:E:503:DLX:C32  | 2.90                     | 0.49              |
| 3:C:206:ALA:O    | 3:C:210:VAL:HG23 | 2.13                     | 0.49              |
| 3:C:146:MET:HG2  | 8:C:302:HEC:HMA3 | 1.95                     | 0.49              |
| 3:F:206:ALA:O    | 3:F:210:VAL:HG23 | 2.13                     | 0.48              |
| 3:C:87:ALA:HA    | 3:C:88:ALA:HA    | 1.61                     | 0.48              |
| 2:E:107:PHE:HE2  | 7:E:505:PGV:H291 | 1.78                     | 0.48              |
| 3:F:146:MET:HG2  | 8:F:302:HEC:HMA3 | 1.95                     | 0.48              |
| 1:D:114:LEU:HD12 | 1:D:138:HIS:HE2  | 1.78                     | 0.48              |
| 2:E:323:LEU:HD11 | 2:E:384:VAL:HG12 | 1.96                     | 0.48              |
| 2:E:71:ASP:O     | 2:E:75:TYR:HB3   | 2.14                     | 0.48              |
| 1:A:114:LEU:HD12 | 1:A:138:HIS:HE2  | 1.78                     | 0.48              |
| 2:E:238:LYS:CD   | 2:E:239:ASN:H    | 2.26                     | 0.48              |
| 2:E:98:PHE:CE2   | 2:E:133:LEU:HD11 | 2.49                     | 0.48              |
| 1:D:143:THR:HG22 | 1:D:147:ASP:O    | 2.14                     | 0.47              |
| 3:F:130:GLN:HG2  | 3:F:132:LEU:HG   | 1.96                     | 0.47              |
| 2:E:272:HIS:CE1  | 3:F:25:PHE:HB3   | 2.48                     | 0.47              |
| 1:A:45:THR:HG21  | 1:A:62:TRP:HD1   | 1.79                     | 0.47              |
| 7:B:506:PGV:H22  | 6:E:504:DLX:C13  | 2.44                     | 0.47              |
| 2:B:107:PHE:HE2  | 7:B:505:PGV:H291 | 1.78                     | 0.47              |
| 2:B:71:ASP:O     | 2:B:75:TYR:HB3   | 2.14                     | 0.47              |
| 2:E:151:TRP:HB3  | 2:E:294:ILE:HG12 | 1.97                     | 0.47              |
| 1:D:45:THR:HG21  | 1:D:62:TRP:HD1   | 1.79                     | 0.47              |
| 1:A:111:CYS:HB3  | 1:A:116:CYS:H    | 1.80                     | 0.47              |
| 2:B:98:PHE:CE2   | 2:B:133:LEU:HD11 | 2.49                     | 0.47              |
| 3:C:99:SER:N     | 3:C:100:GLY:HA3  | 2.30                     | 0.47              |
| 1:D:100:LYS:HA   | 1:D:100:LYS:HD2  | 1.61                     | 0.47              |

Continued on next page...

Continued from previous page...

| Atom-1           | Atom-2           | Interatomic distance (Å) | Clash overlap (Å) |
|------------------|------------------|--------------------------|-------------------|
| 3:F:78:TYR:CD2   | 3:F:144:SER:HB3  | 2.50                     | 0.47              |
| 1:A:143:THR:HG22 | 1:A:147:ASP:O    | 2.14                     | 0.46              |
| 3:C:172:PRO:HD3  | 8:C:302:HEC:CBC  | 2.46                     | 0.46              |
| 2:B:323:LEU:HD11 | 2:B:384:VAL:HG12 | 1.96                     | 0.46              |
| 2:E:307:PHE:O    | 2:E:308:ARG:HG3  | 2.15                     | 0.46              |
| 5:B:502:HEM:HBB2 | 5:B:502:HEM:HMB1 | 1.96                     | 0.46              |
| 1:D:111:CYS:HB3  | 1:D:116:CYS:H    | 1.80                     | 0.46              |
| 2:E:146:GLY:O    | 2:E:285:ALA:HB2  | 2.16                     | 0.46              |
| 3:F:109:LEU:HD23 | 3:F:109:LEU:H    | 1.81                     | 0.46              |
| 3:F:89:ASN:ND2   | 3:F:125:ALA:HB1  | 2.31                     | 0.46              |
| 2:B:307:PHE:O    | 2:B:308:ARG:HG3  | 2.15                     | 0.46              |
| 2:B:120:GLU:O    | 2:B:124:ILE:HG12 | 2.16                     | 0.46              |
| 3:C:106:PHE:HA   | 3:C:107:GLY:HA2  | 1.65                     | 0.46              |
| 3:F:99:SER:N     | 3:F:100:GLY:HA3  | 2.30                     | 0.46              |
| 3:C:130:GLN:HG2  | 3:C:132:LEU:HG   | 1.96                     | 0.46              |
| 5:E:502:HEM:HMB1 | 5:E:502:HEM:HBB2 | 1.96                     | 0.46              |
| 2:B:58:LEU:HD13  | 5:B:501:HEM:HBD1 | 1.97                     | 0.46              |
| 2:E:386:ALA:HA   | 2:E:389:ILE:HG12 | 1.98                     | 0.46              |
| 3:F:172:PRO:HD3  | 8:F:302:HEC:CBC  | 2.46                     | 0.46              |
| 2:B:151:TRP:HB3  | 2:B:294:ILE:HG12 | 1.97                     | 0.46              |
| 3:C:78:TYR:CD2   | 3:C:144:SER:HB3  | 2.50                     | 0.46              |
| 2:E:120:GLU:O    | 2:E:124:ILE:HG12 | 2.16                     | 0.46              |
| 2:E:58:LEU:HD13  | 5:E:501:HEM:HBD1 | 1.97                     | 0.46              |
| 2:B:146:GLY:O    | 2:B:285:ALA:HB2  | 2.15                     | 0.45              |
| 1:A:100:LYS:HD2  | 1:A:100:LYS:HA   | 1.61                     | 0.45              |
| 1:D:120:TRP:HA   | 1:D:133:PHE:HB2  | 1.98                     | 0.45              |
| 3:C:89:ASN:ND2   | 3:C:125:ALA:HB1  | 2.31                     | 0.45              |
| 1:A:152:PRO:N    | 1:A:153:PRO:HD2  | 2.32                     | 0.45              |
| 1:A:16:LEU:HG    | 3:C:218:TYR:CE1  | 2.52                     | 0.45              |
| 1:D:163:LYS:HB2  | 1:D:170:ILE:HG13 | 1.98                     | 0.45              |
| 2:E:329:LEU:O    | 2:E:333:LEU:N    | 2.50                     | 0.45              |
| 3:F:121:TYR:O    | 3:F:122:GLU:HG2  | 2.17                     | 0.45              |
| 1:D:16:LEU:HG    | 3:F:218:TYR:CE1  | 2.52                     | 0.45              |
| 2:E:235:ASP:OD2  | 2:E:239:ASN:HB2  | 2.17                     | 0.45              |
| 1:A:36:SER:O     | 1:A:37:GLU:HG3   | 2.17                     | 0.45              |
| 2:B:329:LEU:O    | 2:B:333:LEU:N    | 2.50                     | 0.45              |
| 3:C:57:THR:OG1   | 3:C:60:GLU:HG3   | 2.17                     | 0.45              |
| 2:E:139:SER:HB2  | 2:E:198:VAL:HG13 | 1.99                     | 0.45              |
| 3:C:109:LEU:H    | 3:C:109:LEU:HD23 | 1.81                     | 0.45              |
| 1:D:65:LYS:HA    | 1:D:66:THR:HA    | 1.58                     | 0.45              |
| 3:F:160:LEU:C    | 3:F:160:LEU:CD1  | 2.85                     | 0.45              |

Continued on next page...

Continued from previous page...

| Atom-1           | Atom-2           | Interatomic distance (Å) | Clash overlap (Å) |
|------------------|------------------|--------------------------|-------------------|
| 1:A:111:CYS:SG   | 1:A:142:TYR:OH   | 2.69                     | 0.44              |
| 1:A:120:TRP:HA   | 1:A:133:PHE:HB2  | 1.98                     | 0.44              |
| 2:B:116:LYS:O    | 2:B:119:ARG:N    | 2.44                     | 0.44              |
| 2:B:386:ALA:HA   | 2:B:389:ILE:HG12 | 1.98                     | 0.44              |
| 3:C:121:TYR:O    | 3:C:122:GLU:HG2  | 2.17                     | 0.44              |
| 3:C:160:LEU:C    | 3:C:160:LEU:CD1  | 2.85                     | 0.44              |
| 1:A:163:LYS:HB2  | 1:A:170:ILE:HG13 | 1.99                     | 0.44              |
| 6:B:503:DLX:C24  | 7:B:506:PGV:C34  | 2.95                     | 0.44              |
| 2:E:61:TYR:HB2   | 2:E:77:ILE:HD11  | 1.99                     | 0.44              |
| 2:B:235:ASP:OD2  | 2:B:239:ASN:HB2  | 2.17                     | 0.44              |
| 3:F:57:THR:OG1   | 3:F:60:GLU:HG3   | 2.17                     | 0.44              |
| 1:D:152:PRO:N    | 1:D:153:PRO:HD2  | 2.32                     | 0.44              |
| 6:E:503:DLX:C38  | 6:E:503:DLX:C42  | 2.96                     | 0.44              |
| 8:C:302:HEC:HBA2 | 8:C:302:HEC:HHA  | 2.00                     | 0.44              |
| 3:C:60:GLU:O     | 3:C:64:GLU:HG2   | 2.18                     | 0.44              |
| 1:D:36:SER:O     | 1:D:37:GLU:HG3   | 2.17                     | 0.44              |
| 2:B:61:TYR:HB2   | 2:B:77:ILE:HD11  | 1.99                     | 0.43              |
| 3:F:38:ASP:HB2   | 3:F:156:TYR:CE2  | 2.53                     | 0.43              |
| 6:B:503:DLX:C42  | 6:B:503:DLX:C38  | 2.96                     | 0.43              |
| 3:C:159:ILE:HD13 | 8:C:302:HEC:CMB  | 2.38                     | 0.43              |
| 3:C:41:VAL:HB    | 3:C:44:ILE:HG12  | 2.01                     | 0.43              |
| 1:A:66:THR:OG1   | 1:A:109:GLY:O    | 2.36                     | 0.43              |
| 2:B:278:PRO:HG2  | 2:B:281:ASN:HB2  | 2.00                     | 0.43              |
| 1:D:66:THR:OG1   | 1:D:109:GLY:O    | 2.36                     | 0.43              |
| 3:C:38:ASP:HB2   | 3:C:156:TYR:CE2  | 2.53                     | 0.43              |
| 1:A:41:LEU:HD12  | 1:A:41:LEU:HA    | 1.90                     | 0.43              |
| 2:E:130:TYR:CZ   | 2:E:134:ILE:HD11 | 2.54                     | 0.43              |
| 2:B:139:SER:HB2  | 2:B:198:VAL:HG13 | 1.99                     | 0.43              |
| 2:B:52:ILE:O     | 2:B:56:MET:HG3   | 2.19                     | 0.43              |
| 3:C:64:GLU:HA    | 3:C:67:ILE:HG12  | 2.01                     | 0.42              |
| 3:F:64:GLU:HA    | 3:F:67:ILE:HG12  | 2.00                     | 0.42              |
| 2:B:217:HIS:NE2  | 5:B:502:HEM:ND   | 2.67                     | 0.42              |
| 3:F:130:GLN:N    | 3:F:130:GLN:OE1  | 2.52                     | 0.42              |
| 3:F:60:GLU:O     | 3:F:64:GLU:HG2   | 2.18                     | 0.42              |
| 3:F:41:VAL:HB    | 3:F:44:ILE:HG12  | 2.00                     | 0.42              |
| 2:B:247:HIS:CE1  | 2:B:248:PRO:HB3  | 2.55                     | 0.42              |
| 6:B:503:DLX:C22  | 7:B:506:PGV:H341 | 2.45                     | 0.42              |
| 2:B:289:LYS:HE2  | 1:D:114:LEU:HD22 | 2.01                     | 0.42              |
| 2:E:191:THR:OG1  | 2:E:192:ASP:N    | 2.52                     | 0.42              |
| 2:E:266:PHE:HA   | 2:E:269:VAL:HB   | 2.00                     | 0.42              |
| 2:E:278:PRO:HG2  | 2:E:281:ASN:HB2  | 2.00                     | 0.42              |

Continued on next page...

Continued from previous page...

| Atom-1           | Atom-2           | Interatomic distance (Å) | Clash overlap (Å) |
|------------------|------------------|--------------------------|-------------------|
| 2:E:308:ARG:HH22 | 2:E:373:ASN:ND2  | 2.18                     | 0.42              |
| 2:E:52:ILE:O     | 2:E:56:MET:HG3   | 2.19                     | 0.42              |
| 8:F:302:HEC:HHA  | 8:F:302:HEC:HBA2 | 2.00                     | 0.42              |
| 2:B:130:TYR:CZ   | 2:B:134:ILE:HD11 | 2.54                     | 0.42              |
| 3:C:130:GLN:OE1  | 3:C:130:GLN:N    | 2.52                     | 0.42              |
| 3:F:155:LEU:O    | 3:F:159:ILE:HG13 | 2.20                     | 0.42              |
| 3:C:155:LEU:O    | 3:C:159:ILE:HG13 | 2.19                     | 0.42              |
| 1:D:111:CYS:SG   | 1:D:142:TYR:OH   | 2.69                     | 0.42              |
| 1:D:147:ASP:HA   | 1:D:156:PRO:HB3  | 2.01                     | 0.42              |
| 2:E:113:ASN:HA   | 2:E:115:TYR:CE2  | 2.55                     | 0.42              |
| 2:E:201:SER:OG   | 2:E:202:HIS:N    | 2.53                     | 0.42              |
| 1:A:119:LEU:O    | 1:A:133:PHE:HB2  | 2.19                     | 0.42              |
| 2:B:113:ASN:HA   | 2:B:115:TYR:CE2  | 2.55                     | 0.42              |
| 2:B:266:PHE:HA   | 2:B:269:VAL:HB   | 2.01                     | 0.42              |
| 7:B:506:PGV:H101 | 7:B:506:PGV:H131 | 1.83                     | 0.42              |
| 3:C:136:LEU:HD21 | 8:C:302:HEC:HAC  | 2.02                     | 0.42              |
| 2:E:119:ARG:CZ   | 2:E:227:SER:HB3  | 2.50                     | 0.42              |
| 1:A:32:MET:O     | 2:E:197:ARG:HD3  | 2.20                     | 0.42              |
| 2:E:217:HIS:NE2  | 5:E:502:HEM:ND   | 2.67                     | 0.42              |
| 2:B:25:MET:HB3   | 2:B:247:HIS:HB2  | 2.02                     | 0.42              |
| 3:C:85:SER:O     | 3:C:85:SER:OG    | 2.38                     | 0.42              |
| 2:B:197:ARG:HD3  | 1:D:32:MET:O     | 2.20                     | 0.42              |
| 2:B:191:THR:OG1  | 2:B:192:ASP:N    | 2.52                     | 0.41              |
| 2:B:201:SER:OG   | 2:B:202:HIS:N    | 2.53                     | 0.41              |
| 2:B:244:VAL:O    | 2:B:244:VAL:HG13 | 2.20                     | 0.41              |
| 3:C:89:ASN:N     | 3:C:90:PRO:HD2   | 2.35                     | 0.41              |
| 3:C:97:LYS:HD3   | 3:C:97:LYS:HA    | 1.78                     | 0.41              |
| 2:E:247:HIS:CE1  | 2:E:248:PRO:HB3  | 2.54                     | 0.41              |
| 2:E:46:VAL:O     | 2:E:50:ILE:HG12  | 2.21                     | 0.41              |
| 2:B:64:PRO:HD2   | 2:E:64:PRO:HD2   | 2.02                     | 0.41              |
| 3:F:112:ASP:N    | 3:F:112:ASP:OD1  | 2.53                     | 0.41              |
| 3:F:171:MET:HA   | 3:F:172:PRO:HD3  | 1.94                     | 0.41              |
| 2:B:238:LYS:CD   | 2:B:239:ASN:H    | 2.26                     | 0.41              |
| 3:C:138:GLN:HB3  | 1:D:116:CYS:SG   | 2.60                     | 0.41              |
| 3:F:226:LEU:HD23 | 3:F:226:LEU:HA   | 1.95                     | 0.41              |
| 1:A:41:LEU:HA    | 1:A:42:GLY:HA2   | 1.68                     | 0.41              |
| 2:B:310:ILE:HD13 | 2:B:315:TRP:CD1  | 2.56                     | 0.41              |
| 1:A:114:LEU:HD22 | 2:E:289:LYS:HE2  | 2.01                     | 0.41              |
| 1:A:121:LYS:HE2  | 1:A:121:LYS:HB2  | 1.91                     | 0.41              |
| 1:D:119:LEU:O    | 1:D:133:PHE:HB2  | 2.19                     | 0.41              |
| 3:F:89:ASN:N     | 3:F:90:PRO:HD2   | 2.35                     | 0.41              |

Continued on next page...

Continued from previous page...

| Atom-1           | Atom-2           | Interatomic distance (Å) | Clash overlap (Å) |
|------------------|------------------|--------------------------|-------------------|
| 1:A:65:LYS:HA    | 1:A:66:THR:HA    | 1.58                     | 0.41              |
| 2:B:294:ILE:HA   | 2:B:294:ILE:HD12 | 1.91                     | 0.41              |
| 3:C:234:LEU:HD23 | 3:C:234:LEU:HA   | 1.93                     | 0.41              |
| 3:F:136:LEU:HD21 | 8:F:302:HEC:HAC  | 2.02                     | 0.41              |
| 3:F:106:PHE:HA   | 3:F:107:GLY:HA2  | 1.65                     | 0.41              |
| 2:B:119:ARG:CZ   | 2:B:227:SER:HB3  | 2.50                     | 0.41              |
| 2:B:349:VAL:O    | 2:B:352:VAL:HG12 | 2.21                     | 0.41              |
| 2:E:113:ASN:HB2  | 2:E:339:LYS:O    | 2.21                     | 0.41              |
| 2:E:127:TRP:CD2  | 2:E:328:LEU:HG   | 2.56                     | 0.41              |
| 7:B:506:PGV:C18  | 6:E:503:DLX:C46  | 2.98                     | 0.41              |
| 2:B:147:GLN:N    | 2:B:283:GLU:O    | 2.54                     | 0.41              |
| 2:B:356:ILE:HA   | 2:B:356:ILE:HD13 | 1.96                     | 0.41              |
| 2:B:46:VAL:O     | 2:B:50:ILE:HG12  | 2.21                     | 0.41              |
| 2:E:25:MET:HB3   | 2:E:247:HIS:HB2  | 2.02                     | 0.41              |
| 1:A:147:ASP:HA   | 1:A:156:PRO:HB3  | 2.01                     | 0.41              |
| 2:E:242:LYS:HB2  | 2:E:242:LYS:HE2  | 1.95                     | 0.41              |
| 2:E:154:ILE:HD13 | 2:E:154:ILE:HA   | 1.91                     | 0.40              |
| 3:F:123:ALA:HA   | 3:F:127:ASP:HB2  | 2.02                     | 0.40              |
| 3:C:104:TYR:HA   | 3:C:109:LEU:HA   | 2.03                     | 0.40              |
| 3:C:176:ASN:O    | 3:C:180:ASP:HB2  | 2.22                     | 0.40              |
| 2:E:244:VAL:O    | 2:E:244:VAL:HG13 | 2.20                     | 0.40              |
| 2:E:74:THR:O     | 2:E:78:MET:HB2   | 2.21                     | 0.40              |
| 3:F:85:SER:HA    | 3:F:86:VAL:HA    | 1.83                     | 0.40              |
| 1:A:114:LEU:HD23 | 1:A:114:LEU:HA   | 1.82                     | 0.40              |
| 2:B:113:ASN:HB2  | 2:B:339:LYS:O    | 2.21                     | 0.40              |
| 3:C:123:ALA:HA   | 3:C:127:ASP:HB2  | 2.02                     | 0.40              |
| 3:C:66:PHE:CE1   | 3:C:143:LEU:HD12 | 2.57                     | 0.40              |
| 2:E:147:GLN:N    | 2:E:283:GLU:O    | 2.54                     | 0.40              |
| 2:E:346:LEU:HD12 | 2:E:346:LEU:HA   | 1.96                     | 0.40              |
| 2:B:308:ARG:HH22 | 2:B:373:ASN:ND2  | 2.18                     | 0.40              |
| 2:B:330:LEU:HD12 | 2:B:388:PHE:HE1  | 1.87                     | 0.40              |
| 2:B:167:PRO:HB3  | 2:B:314:PHE:CE2  | 2.57                     | 0.40              |
| 2:E:310:ILE:HD13 | 2:E:315:TRP:CD1  | 2.56                     | 0.40              |
| 3:F:132:LEU:O    | 3:F:136:LEU:HB2  | 2.22                     | 0.40              |
| 1:A:116:CYS:SG   | 3:F:138:GLN:HB3  | 2.62                     | 0.40              |
| 3:F:41:VAL:HG23  | 3:F:42:LYS:N     | 2.34                     | 0.40              |
| 3:F:66:PHE:CE1   | 3:F:143:LEU:HD12 | 2.57                     | 0.40              |

There are no symmetry-related clashes.

## 5.3 Torsion angles [i](#)

### 5.3.1 Protein backbone [i](#)

In the following table, the Percentiles column shows the percent Ramachandran outliers of the chain as a percentile score with respect to all PDB entries followed by that with respect to all EM entries.

The Analysed column shows the number of residues for which the backbone conformation was analysed, and the total number of residues.

| Mol | Chain | Analysed        | Favoured   | Allowed   | Outliers | Percentiles |     |
|-----|-------|-----------------|------------|-----------|----------|-------------|-----|
| 1   | A     | 128/181 (71%)   | 111 (87%)  | 17 (13%)  | 0        | 100         | 100 |
| 1   | D     | 128/181 (71%)   | 111 (87%)  | 17 (13%)  | 0        | 100         | 100 |
| 2   | B     | 393/410 (96%)   | 358 (91%)  | 35 (9%)   | 0        | 100         | 100 |
| 2   | E     | 393/410 (96%)   | 359 (91%)  | 34 (9%)   | 0        | 100         | 100 |
| 3   | C     | 234/240 (98%)   | 204 (87%)  | 29 (12%)  | 1 (0%)   | 36          | 69  |
| 3   | F     | 234/240 (98%)   | 204 (87%)  | 29 (12%)  | 1 (0%)   | 36          | 69  |
| All | All   | 1510/1662 (91%) | 1347 (89%) | 161 (11%) | 2 (0%)   | 56          | 84  |

All (2) Ramachandran outliers are listed below:

| Mol | Chain | Res | Type |
|-----|-------|-----|------|
| 3   | C     | 141 | PRO  |
| 3   | F     | 141 | PRO  |

### 5.3.2 Protein sidechains [i](#)

In the following table, the Percentiles column shows the percent sidechain outliers of the chain as a percentile score with respect to all PDB entries followed by that with respect to all EM entries.

The Analysed column shows the number of residues for which the sidechain conformation was analysed, and the total number of residues.

| Mol | Chain | Analysed      | Rotameric  | Outliers | Percentiles |    |
|-----|-------|---------------|------------|----------|-------------|----|
| 1   | A     | 108/145 (74%) | 107 (99%)  | 1 (1%)   | 81          | 89 |
| 1   | D     | 108/145 (74%) | 107 (99%)  | 1 (1%)   | 81          | 89 |
| 2   | B     | 339/350 (97%) | 338 (100%) | 1 (0%)   | 93          | 97 |
| 2   | E     | 339/350 (97%) | 338 (100%) | 1 (0%)   | 93          | 97 |
| 3   | C     | 206/210 (98%) | 203 (98%)  | 3 (2%)   | 67          | 84 |

Continued on next page...

Continued from previous page...

| Mol | Chain | Analysed        | Rotameric  | Outliers | Percentiles |    |
|-----|-------|-----------------|------------|----------|-------------|----|
| 3   | F     | 206/210 (98%)   | 203 (98%)  | 3 (2%)   | 67          | 84 |
| All | All   | 1306/1410 (93%) | 1296 (99%) | 10 (1%)  | 84          | 91 |

All (10) residues with a non-rotameric sidechain are listed below:

| Mol | Chain | Res | Type |
|-----|-------|-----|------|
| 1   | A     | 37  | GLU  |
| 2   | B     | 174 | LYS  |
| 3   | C     | 10  | ILE  |
| 3   | C     | 160 | LEU  |
| 3   | C     | 203 | LYS  |
| 1   | D     | 37  | GLU  |
| 2   | E     | 174 | LYS  |
| 3   | F     | 10  | ILE  |
| 3   | F     | 160 | LEU  |
| 3   | F     | 203 | LYS  |

Some sidechains can be flipped to improve hydrogen bonding and reduce clashes. All (16) such sidechains are listed below:

| Mol | Chain | Res | Type |
|-----|-------|-----|------|
| 1   | A     | 113 | HIS  |
| 2   | B     | 24  | GLN  |
| 2   | B     | 51  | GLN  |
| 2   | B     | 96  | ASN  |
| 2   | B     | 147 | GLN  |
| 2   | B     | 373 | ASN  |
| 3   | C     | 176 | ASN  |
| 3   | C     | 198 | ASN  |
| 1   | D     | 113 | HIS  |
| 2   | E     | 24  | GLN  |
| 2   | E     | 51  | GLN  |
| 2   | E     | 96  | ASN  |
| 2   | E     | 147 | GLN  |
| 2   | E     | 373 | ASN  |
| 3   | F     | 176 | ASN  |
| 3   | F     | 198 | ASN  |

### 5.3.3 RNA [i](#)

There are no RNA molecules in this entry.



## 5.4 Non-standard residues in protein, DNA, RNA chains (i)

There are no non-standard protein/DNA/RNA residues in this entry.

## 5.5 Carbohydrates (i)

There are no carbohydrates in this entry.

## 5.6 Ligand geometry (i)

17 ligands are modelled in this entry.

In the following table, the Counts columns list the number of bonds (or angles) for which Mogul statistics could be retrieved, the number of bonds (or angles) that are observed in the model and the number of bonds (or angles) that are defined in the Chemical Component Dictionary. The Link column lists molecule types, if any, to which the group is linked. The Z score for a bond length (or angle) is the number of standard deviations the observed value is removed from the expected value. A bond length (or angle) with  $|Z| > 2$  is considered an outlier worth inspection. RMSZ is the root-mean-square of all Z scores of the bond lengths (or angles).

| Mol | Type | Chain | Res | Link | Bond lengths |      |          | Bond angles |      |          |
|-----|------|-------|-----|------|--------------|------|----------|-------------|------|----------|
|     |      |       |     |      | Counts       | RMSZ | # Z  > 2 | Counts      | RMSZ | # Z  > 2 |
| 4   | FES  | A     | 501 | 1    | 0,4,4        | 0.00 | -        | -           |      |          |
| 5   | HEM  | B     | 501 | 2    | 27,50,50     | 1.92 | 4 (14%)  | 17,82,82    | 1.31 | 1 (5%)   |
| 5   | HEM  | B     | 502 | 2    | 27,50,50     | 1.77 | 4 (14%)  | 17,82,82    | 1.54 | 4 (23%)  |
| 6   | DLX  | B     | 503 | -    | 48,48,48     | 1.56 | 6 (12%)  | 59,61,61    | 1.62 | 14 (23%) |
| 6   | DLX  | B     | 504 | -    | 48,48,48     | 4.51 | 27 (56%) | 59,61,61    | 3.11 | 22 (37%) |
| 7   | PGV  | B     | 505 | 2    | 50,50,50     | 1.20 | 4 (8%)   | 53,56,56    | 0.86 | 2 (3%)   |
| 7   | PGV  | B     | 506 | -    | 50,50,50     | 0.88 | 3 (6%)   | 53,56,56    | 0.86 | 3 (5%)   |
| 6   | DLX  | C     | 301 | -    | 48,48,48     | 4.48 | 27 (56%) | 59,61,61    | 3.11 | 23 (38%) |
| 8   | HEC  | C     | 302 | 3    | 26,50,50     | 2.35 | 3 (11%)  | 18,82,82    | 1.57 | 4 (22%)  |
| 4   | FES  | D     | 501 | 1    | 0,4,4        | 0.00 | -        | -           |      |          |
| 5   | HEM  | E     | 501 | 2    | 27,50,50     | 1.92 | 4 (14%)  | 17,82,82    | 1.31 | 1 (5%)   |
| 5   | HEM  | E     | 502 | 2    | 27,50,50     | 1.77 | 4 (14%)  | 17,82,82    | 1.52 | 4 (23%)  |
| 6   | DLX  | E     | 503 | -    | 48,48,48     | 1.56 | 6 (12%)  | 59,61,61    | 1.63 | 14 (23%) |
| 6   | DLX  | E     | 504 | -    | 48,48,48     | 4.51 | 27 (56%) | 59,61,61    | 3.11 | 22 (37%) |
| 7   | PGV  | E     | 505 | 2    | 50,50,50     | 1.20 | 4 (8%)   | 53,56,56    | 0.86 | 2 (3%)   |
| 6   | DLX  | F     | 301 | -    | 48,48,48     | 4.48 | 27 (56%) | 59,61,61    | 3.12 | 23 (38%) |
| 8   | HEC  | F     | 302 | 3    | 26,50,50     | 2.35 | 3 (11%)  | 18,82,82    | 1.57 | 4 (22%)  |

In the following table, the Chirals column lists the number of chiral outliers, the number of chiral

centers analysed, the number of these observed in the model and the number defined in the Chemical Component Dictionary. Similar counts are reported in the Torsion and Rings columns. '-' means no outliers of that kind were identified.

| Mol | Type | Chain | Res | Link | Chirals | Torsions    | Rings   |
|-----|------|-------|-----|------|---------|-------------|---------|
| 4   | FES  | A     | 501 | 1    | -       | -           | 0/1/1/1 |
| 5   | HEM  | B     | 501 | 2    | -       | 1/6/54/54   | -       |
| 5   | HEM  | B     | 502 | 2    | -       | 0/6/54/54   | -       |
| 6   | DLX  | B     | 503 | -    | -       | 10/41/57/57 | 0/2/2/2 |
| 6   | DLX  | B     | 504 | -    | -       | 22/41/57/57 | 0/2/2/2 |
| 7   | PGV  | B     | 505 | 2    | -       | 20/55/55/55 | -       |
| 7   | PGV  | B     | 506 | -    | -       | 34/55/55/55 | -       |
| 6   | DLX  | C     | 301 | -    | -       | 23/41/57/57 | 0/2/2/2 |
| 8   | HEC  | C     | 302 | 3    | -       | 2/6/54/54   | -       |
| 4   | FES  | D     | 501 | 1    | -       | -           | 0/1/1/1 |
| 5   | HEM  | E     | 501 | 2    | -       | 1/6/54/54   | -       |
| 5   | HEM  | E     | 502 | 2    | -       | 0/6/54/54   | -       |
| 6   | DLX  | E     | 503 | -    | -       | 10/41/57/57 | 0/2/2/2 |
| 6   | DLX  | E     | 504 | -    | -       | 22/41/57/57 | 0/2/2/2 |
| 7   | PGV  | E     | 505 | 2    | -       | 20/55/55/55 | -       |
| 6   | DLX  | F     | 301 | -    | -       | 23/41/57/57 | 0/2/2/2 |
| 8   | HEC  | F     | 302 | 3    | -       | 2/6/54/54   | -       |

All (153) bond length outliers are listed below:

| Mol | Chain | Res | Type | Atoms   | Z     | Observed(Å) | Ideal(Å) |
|-----|-------|-----|------|---------|-------|-------------|----------|
| 6   | B     | 504 | DLX  | C30-C31 | 13.67 | 1.66        | 1.33     |
| 6   | E     | 504 | DLX  | C30-C31 | 13.67 | 1.66        | 1.33     |
| 6   | F     | 301 | DLX  | C30-C31 | 13.59 | 1.66        | 1.33     |
| 6   | C     | 301 | DLX  | C30-C31 | 13.57 | 1.66        | 1.33     |
| 6   | E     | 504 | DLX  | C22-C23 | 11.16 | 1.60        | 1.33     |
| 6   | B     | 504 | DLX  | C22-C23 | 11.16 | 1.60        | 1.33     |
| 6   | F     | 301 | DLX  | C22-C23 | 11.07 | 1.59        | 1.33     |
| 6   | C     | 301 | DLX  | C22-C23 | 11.06 | 1.59        | 1.33     |
| 6   | C     | 301 | DLX  | C26-C27 | 10.44 | 1.58        | 1.33     |
| 6   | B     | 504 | DLX  | C26-C27 | 10.43 | 1.58        | 1.33     |
| 6   | E     | 504 | DLX  | C26-C27 | 10.42 | 1.58        | 1.33     |
| 6   | F     | 301 | DLX  | C26-C27 | 10.41 | 1.58        | 1.33     |
| 6   | B     | 504 | DLX  | O11-C01 | 9.51  | 1.45        | 1.24     |
| 6   | E     | 504 | DLX  | O11-C01 | 9.49  | 1.45        | 1.24     |
| 6   | F     | 301 | DLX  | O11-C01 | 9.46  | 1.45        | 1.24     |
| 6   | C     | 301 | DLX  | O11-C01 | 9.46  | 1.45        | 1.24     |

Continued on next page...

Continued from previous page...

| Mol | Chain | Res | Type | Atoms   | Z     | Observed(Å) | Ideal(Å) |
|-----|-------|-----|------|---------|-------|-------------|----------|
| 6   | B     | 504 | DLX  | C18-C19 | 8.97  | 1.54        | 1.33     |
| 6   | E     | 504 | DLX  | C18-C19 | 8.95  | 1.54        | 1.33     |
| 6   | F     | 301 | DLX  | C18-C19 | 8.90  | 1.54        | 1.33     |
| 6   | C     | 301 | DLX  | C18-C19 | 8.87  | 1.54        | 1.33     |
| 6   | E     | 504 | DLX  | C14-C15 | 8.28  | 1.53        | 1.33     |
| 6   | B     | 504 | DLX  | C14-C15 | 8.24  | 1.53        | 1.33     |
| 6   | C     | 301 | DLX  | C14-C15 | 8.23  | 1.53        | 1.33     |
| 6   | F     | 301 | DLX  | C14-C15 | 8.21  | 1.53        | 1.33     |
| 8   | C     | 302 | HEC  | C3B-C2B | -6.35 | 1.34        | 1.40     |
| 8   | C     | 302 | HEC  | C3C-C2C | -6.35 | 1.34        | 1.40     |
| 8   | F     | 302 | HEC  | C3C-C2C | -6.35 | 1.34        | 1.40     |
| 6   | C     | 301 | DLX  | C32-C31 | 6.33  | 1.64        | 1.51     |
| 8   | F     | 302 | HEC  | C3B-C2B | -6.33 | 1.34        | 1.40     |
| 6   | F     | 301 | DLX  | C32-C31 | 6.30  | 1.64        | 1.51     |
| 6   | B     | 504 | DLX  | C32-C31 | 6.23  | 1.64        | 1.51     |
| 6   | E     | 504 | DLX  | C32-C31 | 6.23  | 1.64        | 1.51     |
| 6   | B     | 504 | DLX  | O12-C04 | 5.93  | 1.35        | 1.23     |
| 6   | E     | 504 | DLX  | O12-C04 | 5.93  | 1.35        | 1.23     |
| 6   | F     | 301 | DLX  | O12-C04 | 5.89  | 1.35        | 1.23     |
| 6   | C     | 301 | DLX  | O12-C04 | 5.86  | 1.35        | 1.23     |
| 6   | E     | 504 | DLX  | C13-C05 | 5.42  | 1.56        | 1.51     |
| 6   | B     | 504 | DLX  | C13-C05 | 5.40  | 1.56        | 1.51     |
| 8   | F     | 302 | HEC  | C3D-C2D | 5.35  | 1.53        | 1.37     |
| 8   | C     | 302 | HEC  | C3D-C2D | 5.33  | 1.53        | 1.37     |
| 6   | E     | 503 | DLX  | C02-C01 | -5.27 | 1.39        | 1.48     |
| 6   | B     | 503 | DLX  | C02-C01 | -5.22 | 1.39        | 1.48     |
| 6   | F     | 301 | DLX  | C13-C05 | 5.20  | 1.56        | 1.51     |
| 6   | C     | 301 | DLX  | C13-C05 | 5.20  | 1.56        | 1.51     |
| 6   | E     | 503 | DLX  | C05-C04 | -5.03 | 1.38        | 1.48     |
| 6   | E     | 503 | DLX  | C03-C04 | -5.02 | 1.38        | 1.48     |
| 6   | B     | 503 | DLX  | C03-C04 | -5.02 | 1.38        | 1.48     |
| 5   | E     | 501 | HEM  | C3C-C2C | -5.00 | 1.33        | 1.40     |
| 5   | B     | 501 | HEM  | C3C-C2C | -5.00 | 1.33        | 1.40     |
| 6   | B     | 503 | DLX  | C05-C04 | -5.00 | 1.38        | 1.48     |
| 5   | E     | 501 | HEM  | C3B-C2B | -4.85 | 1.33        | 1.40     |
| 5   | B     | 501 | HEM  | C3B-C2B | -4.85 | 1.33        | 1.40     |
| 6   | E     | 504 | DLX  | C29-C30 | 4.48  | 1.65        | 1.50     |
| 6   | C     | 301 | DLX  | C05-C04 | -4.48 | 1.39        | 1.48     |
| 6   | F     | 301 | DLX  | C05-C04 | -4.47 | 1.39        | 1.48     |
| 6   | B     | 504 | DLX  | C29-C30 | 4.47  | 1.65        | 1.50     |
| 6   | F     | 301 | DLX  | C29-C30 | 4.46  | 1.65        | 1.50     |
| 6   | C     | 301 | DLX  | C29-C30 | 4.46  | 1.65        | 1.50     |

Continued on next page...

Continued from previous page...

| Mol | Chain | Res | Type | Atoms   | Z     | Observed(Å) | Ideal(Å) |
|-----|-------|-----|------|---------|-------|-------------|----------|
| 6   | E     | 504 | DLX  | C05-C04 | -4.40 | 1.39        | 1.48     |
| 6   | B     | 504 | DLX  | C05-C04 | -4.36 | 1.39        | 1.48     |
| 6   | F     | 301 | DLX  | C28-C27 | 4.13  | 1.60        | 1.51     |
| 6   | C     | 301 | DLX  | C28-C27 | 4.13  | 1.60        | 1.51     |
| 6   | B     | 504 | DLX  | C28-C27 | 4.08  | 1.60        | 1.51     |
| 6   | E     | 504 | DLX  | C28-C27 | 4.08  | 1.60        | 1.51     |
| 5   | E     | 502 | HEM  | C3B-C2B | -3.89 | 1.35        | 1.40     |
| 6   | B     | 504 | DLX  | C43-C31 | 3.86  | 1.60        | 1.50     |
| 5   | B     | 502 | HEM  | C3C-C2C | -3.85 | 1.35        | 1.40     |
| 6   | E     | 504 | DLX  | C43-C31 | 3.85  | 1.60        | 1.50     |
| 5   | E     | 502 | HEM  | C3C-C2C | -3.85 | 1.35        | 1.40     |
| 6   | C     | 301 | DLX  | C43-C31 | 3.84  | 1.60        | 1.50     |
| 5   | B     | 502 | HEM  | C3B-C2B | -3.83 | 1.35        | 1.40     |
| 6   | F     | 301 | DLX  | C43-C31 | 3.82  | 1.60        | 1.50     |
| 5   | E     | 502 | HEM  | C3C-CAC | 3.69  | 1.55        | 1.47     |
| 5   | B     | 502 | HEM  | C3C-CAC | 3.68  | 1.55        | 1.47     |
| 7   | B     | 505 | PGV  | O03-C19 | 3.60  | 1.44        | 1.33     |
| 7   | E     | 505 | PGV  | O03-C19 | 3.58  | 1.44        | 1.33     |
| 5   | B     | 502 | HEM  | C3B-CAB | 3.56  | 1.55        | 1.47     |
| 5   | E     | 502 | HEM  | C3B-CAB | 3.52  | 1.55        | 1.47     |
| 5   | B     | 501 | HEM  | C3B-CAB | 3.45  | 1.55        | 1.47     |
| 5   | E     | 501 | HEM  | C3B-CAB | 3.45  | 1.55        | 1.47     |
| 6   | F     | 301 | DLX  | C44-C27 | 3.42  | 1.59        | 1.50     |
| 6   | C     | 301 | DLX  | C44-C27 | 3.42  | 1.59        | 1.50     |
| 5   | E     | 501 | HEM  | C3C-CAC | 3.42  | 1.54        | 1.47     |
| 5   | B     | 501 | HEM  | C3C-CAC | 3.42  | 1.54        | 1.47     |
| 6   | E     | 504 | DLX  | C28-C29 | 3.37  | 1.65        | 1.53     |
| 6   | B     | 504 | DLX  | C28-C29 | 3.36  | 1.65        | 1.53     |
| 6   | B     | 504 | DLX  | C10-C03 | 3.35  | 1.45        | 1.39     |
| 6   | E     | 504 | DLX  | C10-C03 | 3.35  | 1.45        | 1.39     |
| 6   | F     | 301 | DLX  | C28-C29 | 3.34  | 1.65        | 1.53     |
| 6   | B     | 504 | DLX  | C44-C27 | 3.34  | 1.59        | 1.50     |
| 6   | C     | 301 | DLX  | C28-C29 | 3.33  | 1.64        | 1.53     |
| 6   | E     | 504 | DLX  | C44-C27 | 3.33  | 1.59        | 1.50     |
| 6   | B     | 504 | DLX  | C25-C26 | 3.25  | 1.61        | 1.50     |
| 6   | C     | 301 | DLX  | C10-C03 | 3.25  | 1.45        | 1.39     |
| 6   | E     | 504 | DLX  | C25-C26 | 3.23  | 1.61        | 1.50     |
| 6   | F     | 301 | DLX  | C10-C03 | 3.21  | 1.45        | 1.39     |
| 6   | F     | 301 | DLX  | C25-C26 | 3.20  | 1.61        | 1.50     |
| 6   | C     | 301 | DLX  | C25-C26 | 3.19  | 1.61        | 1.50     |
| 6   | B     | 504 | DLX  | C13-C14 | 3.15  | 1.55        | 1.50     |
| 6   | F     | 301 | DLX  | C13-C14 | 3.13  | 1.55        | 1.50     |

Continued on next page...

Continued from previous page...

| Mol | Chain | Res | Type | Atoms   | Z     | Observed(Å) | Ideal(Å) |
|-----|-------|-----|------|---------|-------|-------------|----------|
| 6   | E     | 504 | DLX  | C13-C14 | 3.13  | 1.55        | 1.50     |
| 7   | E     | 505 | PGV  | O01-C1  | 3.13  | 1.43        | 1.34     |
| 7   | B     | 505 | PGV  | O01-C1  | 3.13  | 1.43        | 1.34     |
| 6   | C     | 301 | DLX  | C13-C14 | 3.11  | 1.55        | 1.50     |
| 6   | E     | 504 | DLX  | C16-C15 | 3.06  | 1.57        | 1.51     |
| 6   | B     | 504 | DLX  | C16-C15 | 3.06  | 1.57        | 1.51     |
| 6   | F     | 301 | DLX  | C06-C05 | 3.04  | 1.42        | 1.34     |
| 6   | B     | 504 | DLX  | C06-C05 | 3.02  | 1.42        | 1.34     |
| 6   | E     | 504 | DLX  | C06-C05 | 3.02  | 1.42        | 1.34     |
| 6   | C     | 301 | DLX  | C06-C05 | 3.01  | 1.42        | 1.34     |
| 6   | F     | 301 | DLX  | C16-C15 | 2.95  | 1.57        | 1.51     |
| 6   | C     | 301 | DLX  | C16-C15 | 2.95  | 1.57        | 1.51     |
| 6   | E     | 504 | DLX  | C07-C02 | 2.91  | 1.44        | 1.39     |
| 6   | B     | 504 | DLX  | C07-C02 | 2.90  | 1.44        | 1.39     |
| 6   | B     | 503 | DLX  | C06-C01 | -2.89 | 1.38        | 1.44     |
| 6   | E     | 503 | DLX  | C06-C01 | -2.85 | 1.38        | 1.44     |
| 6   | C     | 301 | DLX  | C07-C02 | 2.81  | 1.44        | 1.39     |
| 6   | F     | 301 | DLX  | C07-C02 | 2.80  | 1.44        | 1.39     |
| 6   | C     | 301 | DLX  | C24-C23 | 2.75  | 1.57        | 1.51     |
| 6   | E     | 504 | DLX  | C24-C23 | 2.74  | 1.57        | 1.51     |
| 6   | F     | 301 | DLX  | C24-C23 | 2.71  | 1.57        | 1.51     |
| 6   | B     | 504 | DLX  | C24-C23 | 2.70  | 1.57        | 1.51     |
| 6   | E     | 504 | DLX  | C06-C01 | -2.59 | 1.39        | 1.44     |
| 6   | F     | 301 | DLX  | C06-C01 | -2.57 | 1.39        | 1.44     |
| 6   | B     | 504 | DLX  | C06-C01 | -2.57 | 1.39        | 1.44     |
| 6   | C     | 301 | DLX  | C06-C01 | -2.56 | 1.39        | 1.44     |
| 6   | B     | 504 | DLX  | C03-C04 | -2.53 | 1.43        | 1.48     |
| 6   | B     | 503 | DLX  | O11-C01 | -2.52 | 1.18        | 1.24     |
| 6   | E     | 504 | DLX  | C03-C04 | -2.52 | 1.43        | 1.48     |
| 6   | E     | 503 | DLX  | O11-C01 | -2.51 | 1.18        | 1.24     |
| 6   | E     | 504 | DLX  | C17-C18 | 2.50  | 1.58        | 1.50     |
| 6   | B     | 504 | DLX  | C17-C18 | 2.47  | 1.58        | 1.50     |
| 6   | F     | 301 | DLX  | C03-C04 | -2.45 | 1.43        | 1.48     |
| 6   | C     | 301 | DLX  | C03-C04 | -2.45 | 1.43        | 1.48     |
| 7   | B     | 506 | PGV  | O01-C02 | -2.44 | 1.40        | 1.46     |
| 6   | F     | 301 | DLX  | C17-C18 | 2.44  | 1.58        | 1.50     |
| 6   | C     | 301 | DLX  | C17-C18 | 2.44  | 1.58        | 1.50     |
| 6   | C     | 301 | DLX  | C02-C01 | -2.40 | 1.44        | 1.48     |
| 6   | B     | 504 | DLX  | C21-C22 | 2.39  | 1.58        | 1.50     |
| 6   | E     | 504 | DLX  | C21-C22 | 2.38  | 1.58        | 1.50     |
| 7   | B     | 506 | PGV  | O03-C19 | 2.37  | 1.40        | 1.33     |
| 6   | E     | 504 | DLX  | C02-C01 | -2.36 | 1.44        | 1.48     |

Continued on next page...

Continued from previous page...

| Mol | Chain | Res | Type | Atoms   | Z     | Observed(Å) | Ideal(Å) |
|-----|-------|-----|------|---------|-------|-------------|----------|
| 6   | F     | 301 | DLX  | C02-C01 | -2.35 | 1.44        | 1.48     |
| 6   | B     | 504 | DLX  | C02-C01 | -2.34 | 1.44        | 1.48     |
| 6   | F     | 301 | DLX  | C21-C22 | 2.28  | 1.58        | 1.50     |
| 6   | C     | 301 | DLX  | C21-C22 | 2.28  | 1.58        | 1.50     |
| 6   | B     | 503 | DLX  | O12-C04 | -2.23 | 1.18        | 1.23     |
| 6   | E     | 503 | DLX  | O12-C04 | -2.22 | 1.18        | 1.23     |
| 7   | B     | 505 | PGV  | O01-C02 | -2.08 | 1.41        | 1.46     |
| 7   | E     | 505 | PGV  | O01-C02 | -2.07 | 1.41        | 1.46     |
| 7   | B     | 506 | PGV  | O01-C1  | 2.07  | 1.40        | 1.34     |
| 7   | E     | 505 | PGV  | C20-C19 | 2.02  | 1.56        | 1.50     |
| 7   | B     | 505 | PGV  | C20-C19 | 2.01  | 1.56        | 1.50     |

All (143) bond angle outliers are listed below:

| Mol | Chain | Res | Type | Atoms       | Z     | Observed(°) | Ideal(°) |
|-----|-------|-----|------|-------------|-------|-------------|----------|
| 6   | F     | 301 | DLX  | C13-C14-C15 | -8.66 | 112.37      | 126.79   |
| 6   | C     | 301 | DLX  | C13-C14-C15 | -8.65 | 112.39      | 126.79   |
| 6   | E     | 504 | DLX  | C13-C14-C15 | -8.51 | 112.63      | 126.79   |
| 6   | B     | 504 | DLX  | C13-C14-C15 | -8.50 | 112.64      | 126.79   |
| 6   | F     | 301 | DLX  | C17-C18-C19 | -6.61 | 111.43      | 127.67   |
| 6   | C     | 301 | DLX  | C17-C18-C19 | -6.59 | 111.48      | 127.67   |
| 6   | C     | 301 | DLX  | C21-C22-C23 | -6.45 | 111.83      | 127.67   |
| 6   | F     | 301 | DLX  | C21-C22-C23 | -6.44 | 111.86      | 127.67   |
| 6   | B     | 504 | DLX  | C17-C18-C19 | -6.33 | 112.12      | 127.67   |
| 6   | E     | 504 | DLX  | C17-C18-C19 | -6.33 | 112.12      | 127.67   |
| 6   | F     | 301 | DLX  | C25-C26-C27 | -6.17 | 112.52      | 127.67   |
| 6   | C     | 301 | DLX  | C25-C26-C27 | -6.16 | 112.53      | 127.67   |
| 6   | B     | 504 | DLX  | C21-C22-C23 | -6.16 | 112.54      | 127.67   |
| 6   | E     | 504 | DLX  | C21-C22-C23 | -6.15 | 112.57      | 127.67   |
| 6   | E     | 504 | DLX  | C29-C30-C31 | -6.06 | 112.78      | 127.67   |
| 6   | B     | 504 | DLX  | C29-C30-C31 | -6.05 | 112.81      | 127.67   |
| 6   | C     | 301 | DLX  | C29-C30-C31 | -5.98 | 112.97      | 127.67   |
| 6   | E     | 504 | DLX  | C25-C26-C27 | -5.98 | 112.99      | 127.67   |
| 6   | F     | 301 | DLX  | C29-C30-C31 | -5.98 | 112.99      | 127.67   |
| 6   | B     | 504 | DLX  | C25-C26-C27 | -5.97 | 113.00      | 127.67   |
| 6   | C     | 301 | DLX  | C16-C15-C14 | -5.75 | 109.29      | 121.11   |
| 6   | F     | 301 | DLX  | C16-C15-C14 | -5.75 | 109.29      | 121.11   |
| 6   | F     | 301 | DLX  | C46-C19-C18 | -5.64 | 109.03      | 123.68   |
| 6   | C     | 301 | DLX  | C46-C19-C18 | -5.62 | 109.08      | 123.68   |
| 6   | B     | 504 | DLX  | C46-C19-C18 | -5.59 | 109.16      | 123.68   |
| 6   | E     | 504 | DLX  | C46-C19-C18 | -5.58 | 109.18      | 123.68   |
| 6   | B     | 504 | DLX  | C20-C19-C18 | -5.56 | 109.68      | 121.11   |

Continued on next page...

Continued from previous page...

| Mol | Chain | Res | Type | Atoms       | Z     | Observed(°) | Ideal(°) |
|-----|-------|-----|------|-------------|-------|-------------|----------|
| 6   | F     | 301 | DLX  | C20-C19-C18 | -5.56 | 109.69      | 121.11   |
| 6   | C     | 301 | DLX  | C20-C19-C18 | -5.56 | 109.70      | 121.11   |
| 6   | E     | 504 | DLX  | C20-C19-C18 | -5.55 | 109.71      | 121.11   |
| 6   | E     | 504 | DLX  | C16-C15-C14 | -5.55 | 109.71      | 121.11   |
| 6   | B     | 504 | DLX  | C16-C15-C14 | -5.55 | 109.72      | 121.11   |
| 6   | B     | 504 | DLX  | C47-C15-C14 | -5.37 | 109.72      | 123.68   |
| 6   | E     | 504 | DLX  | C47-C15-C14 | -5.36 | 109.75      | 123.68   |
| 6   | F     | 301 | DLX  | C47-C15-C14 | -5.35 | 109.77      | 123.68   |
| 6   | C     | 301 | DLX  | C47-C15-C14 | -5.34 | 109.81      | 123.68   |
| 6   | B     | 504 | DLX  | C32-C31-C30 | -5.19 | 110.44      | 121.11   |
| 6   | E     | 504 | DLX  | C32-C31-C30 | -5.19 | 110.44      | 121.11   |
| 6   | C     | 301 | DLX  | C45-C23-C22 | -5.01 | 110.67      | 123.68   |
| 6   | F     | 301 | DLX  | C45-C23-C22 | -5.00 | 110.67      | 123.68   |
| 6   | F     | 301 | DLX  | C32-C31-C30 | -4.94 | 110.95      | 121.11   |
| 6   | C     | 301 | DLX  | C32-C31-C30 | -4.94 | 110.97      | 121.11   |
| 6   | B     | 504 | DLX  | C45-C23-C22 | -4.88 | 111.00      | 123.68   |
| 6   | E     | 504 | DLX  | C43-C31-C30 | -4.87 | 111.01      | 123.68   |
| 6   | E     | 504 | DLX  | C45-C23-C22 | -4.87 | 111.01      | 123.68   |
| 6   | B     | 504 | DLX  | C43-C31-C30 | -4.87 | 111.01      | 123.68   |
| 6   | B     | 504 | DLX  | C28-C27-C26 | -4.87 | 111.11      | 121.11   |
| 6   | E     | 504 | DLX  | C28-C27-C26 | -4.86 | 111.12      | 121.11   |
| 6   | E     | 504 | DLX  | C44-C27-C26 | -4.86 | 111.05      | 123.68   |
| 6   | B     | 504 | DLX  | C44-C27-C26 | -4.85 | 111.07      | 123.68   |
| 6   | B     | 504 | DLX  | C24-C23-C22 | -4.82 | 111.22      | 121.11   |
| 6   | E     | 504 | DLX  | C24-C23-C22 | -4.80 | 111.24      | 121.11   |
| 6   | F     | 301 | DLX  | C43-C31-C30 | -4.77 | 111.28      | 123.68   |
| 6   | C     | 301 | DLX  | C43-C31-C30 | -4.77 | 111.29      | 123.68   |
| 6   | F     | 301 | DLX  | C24-C23-C22 | -4.61 | 111.63      | 121.11   |
| 6   | B     | 503 | DLX  | C13-C14-C15 | -4.61 | 119.12      | 126.79   |
| 6   | C     | 301 | DLX  | C24-C23-C22 | -4.60 | 111.65      | 121.11   |
| 6   | E     | 503 | DLX  | C13-C14-C15 | -4.60 | 119.14      | 126.79   |
| 6   | C     | 301 | DLX  | C44-C27-C26 | -4.54 | 111.88      | 123.68   |
| 6   | F     | 301 | DLX  | C44-C27-C26 | -4.54 | 111.89      | 123.68   |
| 6   | C     | 301 | DLX  | C28-C27-C26 | -4.47 | 111.93      | 121.11   |
| 6   | F     | 301 | DLX  | C28-C27-C26 | -4.46 | 111.95      | 121.11   |
| 6   | E     | 503 | DLX  | C13-C05-C04 | 4.06  | 120.17      | 116.88   |
| 6   | B     | 503 | DLX  | C13-C05-C04 | 4.00  | 120.13      | 116.88   |
| 7   | B     | 505 | PGV  | O01-C1-C2   | 3.97  | 120.17      | 111.51   |
| 7   | E     | 505 | PGV  | O01-C1-C2   | 3.94  | 120.10      | 111.51   |
| 7   | B     | 506 | PGV  | O01-C1-C2   | 3.91  | 120.05      | 111.51   |
| 6   | B     | 504 | DLX  | C13-C05-C04 | 3.80  | 119.96      | 116.88   |
| 6   | F     | 301 | DLX  | C13-C05-C04 | 3.75  | 119.93      | 116.88   |

Continued on next page...

Continued from previous page...

| Mol | Chain | Res | Type | Atoms       | Z     | Observed(°) | Ideal(°) |
|-----|-------|-----|------|-------------|-------|-------------|----------|
| 6   | E     | 504 | DLX  | C13-C05-C04 | 3.74  | 119.92      | 116.88   |
| 6   | C     | 301 | DLX  | C13-C05-C04 | 3.71  | 119.89      | 116.88   |
| 6   | E     | 503 | DLX  | C17-C18-C19 | -3.67 | 118.67      | 127.67   |
| 6   | B     | 503 | DLX  | C17-C18-C19 | -3.65 | 118.70      | 127.67   |
| 6   | F     | 301 | DLX  | C46-C19-C20 | -3.56 | 109.15      | 115.29   |
| 6   | B     | 504 | DLX  | C47-C15-C16 | -3.54 | 109.18      | 115.29   |
| 6   | C     | 301 | DLX  | C46-C19-C20 | -3.54 | 109.18      | 115.29   |
| 6   | F     | 301 | DLX  | C47-C15-C16 | -3.54 | 109.18      | 115.29   |
| 6   | C     | 301 | DLX  | C47-C15-C16 | -3.54 | 109.19      | 115.29   |
| 6   | E     | 504 | DLX  | C47-C15-C16 | -3.53 | 109.21      | 115.29   |
| 6   | E     | 504 | DLX  | C46-C19-C20 | -3.47 | 109.31      | 115.29   |
| 6   | B     | 504 | DLX  | C46-C19-C20 | -3.46 | 109.33      | 115.29   |
| 6   | B     | 503 | DLX  | C21-C22-C23 | -2.99 | 120.33      | 127.67   |
| 6   | E     | 503 | DLX  | C21-C22-C23 | -2.99 | 120.33      | 127.67   |
| 8   | C     | 302 | HEC  | CMC-C2C-C1C | -2.95 | 123.93      | 128.46   |
| 8   | F     | 302 | HEC  | CMC-C2C-C1C | -2.94 | 123.95      | 128.46   |
| 6   | E     | 503 | DLX  | C13-C05-C06 | -2.91 | 119.47      | 123.30   |
| 6   | B     | 503 | DLX  | C47-C15-C16 | 2.89  | 120.26      | 115.29   |
| 6   | E     | 503 | DLX  | C47-C15-C16 | 2.89  | 120.26      | 115.29   |
| 6   | E     | 503 | DLX  | C45-C23-C24 | 2.88  | 120.25      | 115.29   |
| 6   | B     | 503 | DLX  | C13-C05-C06 | -2.87 | 119.53      | 123.30   |
| 6   | B     | 503 | DLX  | C45-C23-C24 | 2.87  | 120.22      | 115.29   |
| 6   | B     | 503 | DLX  | C44-C27-C28 | 2.79  | 120.09      | 115.29   |
| 6   | E     | 503 | DLX  | C44-C27-C28 | 2.77  | 120.06      | 115.29   |
| 6   | E     | 503 | DLX  | C46-C19-C20 | 2.73  | 119.99      | 115.29   |
| 6   | E     | 504 | DLX  | C44-C27-C28 | -2.73 | 110.59      | 115.29   |
| 6   | B     | 503 | DLX  | C46-C19-C20 | 2.71  | 119.95      | 115.29   |
| 6   | B     | 504 | DLX  | C44-C27-C28 | -2.71 | 110.62      | 115.29   |
| 8   | F     | 302 | HEC  | CAD-CBD-CGD | -2.66 | 108.12      | 112.66   |
| 6   | B     | 504 | DLX  | C03-C04-C05 | 2.65  | 120.13      | 116.59   |
| 8   | C     | 302 | HEC  | CAD-CBD-CGD | -2.64 | 108.15      | 112.66   |
| 6   | E     | 504 | DLX  | C03-C04-C05 | 2.62  | 120.09      | 116.59   |
| 7   | B     | 505 | PGV  | O03-C19-C20 | 2.60  | 120.29      | 111.93   |
| 7   | E     | 505 | PGV  | O03-C19-C20 | 2.60  | 120.28      | 111.93   |
| 6   | E     | 503 | DLX  | C29-C30-C31 | -2.59 | 121.31      | 127.67   |
| 6   | B     | 503 | DLX  | C29-C30-C31 | -2.58 | 121.34      | 127.67   |
| 6   | B     | 503 | DLX  | C25-C26-C27 | -2.58 | 121.34      | 127.67   |
| 6   | F     | 301 | DLX  | C03-C04-C05 | 2.57  | 120.02      | 116.59   |
| 6   | E     | 503 | DLX  | C25-C26-C27 | -2.56 | 121.37      | 127.67   |
| 6   | C     | 301 | DLX  | C03-C04-C05 | 2.54  | 119.98      | 116.59   |
| 6   | E     | 503 | DLX  | C03-C04-C05 | 2.53  | 119.98      | 116.59   |
| 6   | B     | 503 | DLX  | C03-C04-C05 | 2.53  | 119.97      | 116.59   |

Continued on next page...



Continued from previous page...

| Mol | Chain | Res | Type | Atoms       | Z     | Observed(°) | Ideal(°) |
|-----|-------|-----|------|-------------|-------|-------------|----------|
| 6   | B     | 504 | DLX  | C43-C31-C32 | -2.52 | 110.94      | 115.29   |
| 7   | B     | 506 | PGV  | O03-C19-C20 | 2.50  | 119.97      | 111.93   |
| 6   | E     | 504 | DLX  | C43-C31-C32 | -2.49 | 111.00      | 115.29   |
| 6   | E     | 503 | DLX  | C43-C31-C32 | 2.46  | 119.52      | 115.29   |
| 6   | F     | 301 | DLX  | C13-C05-C06 | -2.41 | 120.13      | 123.30   |
| 6   | B     | 503 | DLX  | C43-C31-C32 | 2.41  | 119.44      | 115.29   |
| 6   | C     | 301 | DLX  | C13-C05-C06 | -2.40 | 120.15      | 123.30   |
| 6   | F     | 301 | DLX  | C44-C27-C28 | -2.37 | 111.20      | 115.29   |
| 6   | C     | 301 | DLX  | C44-C27-C28 | -2.37 | 111.20      | 115.29   |
| 6   | E     | 504 | DLX  | C13-C05-C06 | -2.35 | 120.21      | 123.30   |
| 5   | B     | 502 | HEM  | CMC-C2C-C3C | 2.34  | 129.20      | 124.80   |
| 5   | E     | 502 | HEM  | CMC-C2C-C3C | 2.34  | 129.19      | 124.80   |
| 6   | B     | 504 | DLX  | C13-C05-C06 | -2.33 | 120.24      | 123.30   |
| 8   | F     | 302 | HEC  | CMB-C2B-C1B | -2.31 | 124.92      | 128.46   |
| 8   | C     | 302 | HEC  | CMB-C2B-C1B | -2.31 | 124.92      | 128.46   |
| 5   | B     | 502 | HEM  | CAD-CBD-CGD | -2.29 | 108.75      | 112.66   |
| 6   | F     | 301 | DLX  | O12-C04-C05 | -2.27 | 119.49      | 121.96   |
| 6   | C     | 301 | DLX  | C43-C31-C32 | -2.27 | 111.38      | 115.29   |
| 5   | B     | 502 | HEM  | CMB-C2B-C3B | 2.27  | 129.05      | 124.80   |
| 5   | E     | 502 | HEM  | CAD-CBD-CGD | -2.27 | 108.79      | 112.66   |
| 6   | F     | 301 | DLX  | C43-C31-C32 | -2.24 | 111.42      | 115.29   |
| 6   | C     | 301 | DLX  | O12-C04-C05 | -2.23 | 119.53      | 121.96   |
| 5   | E     | 502 | HEM  | CMB-C2B-C3B | 2.22  | 128.96      | 124.80   |
| 8   | C     | 302 | HEC  | C1D-C2D-C3D | -2.21 | 105.46      | 107.00   |
| 5   | B     | 502 | HEM  | CMA-C3A-C4A | -2.18 | 125.11      | 128.46   |
| 8   | F     | 302 | HEC  | C1D-C2D-C3D | -2.17 | 105.48      | 107.00   |
| 5   | E     | 502 | HEM  | CMA-C3A-C4A | -2.15 | 125.16      | 128.46   |
| 7   | B     | 506 | PGV  | C02-O01-C1  | -2.05 | 112.70      | 117.82   |
| 5   | B     | 501 | HEM  | CBD-CAD-C3D | -2.04 | 108.58      | 112.47   |
| 5   | E     | 501 | HEM  | CBD-CAD-C3D | -2.02 | 108.62      | 112.47   |
| 6   | B     | 503 | DLX  | O12-C04-C05 | -2.01 | 119.77      | 121.96   |
| 6   | E     | 503 | DLX  | O12-C04-C05 | -2.00 | 119.78      | 121.96   |

There are no chirality outliers.

All (190) torsion outliers are listed below:

| Mol | Chain | Res | Type | Atoms           |
|-----|-------|-----|------|-----------------|
| 6   | F     | 301 | DLX  | C29-C30-C31-C43 |
| 6   | F     | 301 | DLX  | C25-C26-C27-C44 |
| 6   | F     | 301 | DLX  | C45-C23-C24-C25 |
| 6   | F     | 301 | DLX  | C21-C22-C23-C45 |
| 6   | F     | 301 | DLX  | C21-C22-C23-C24 |

Continued on next page...

Continued from previous page...

| Mol | Chain | Res | Type | Atoms           |
|-----|-------|-----|------|-----------------|
| 6   | F     | 301 | DLX  | C17-C18-C19-C46 |
| 6   | F     | 301 | DLX  | C17-C18-C19-C20 |
| 6   | F     | 301 | DLX  | C13-C14-C15-C47 |
| 8   | C     | 302 | HEC  | C1A-C2A-CAA-CBA |
| 5   | E     | 501 | HEM  | C3D-CAD-CBD-CGD |
| 6   | B     | 503 | DLX  | C45-C23-C24-C25 |
| 6   | B     | 503 | DLX  | C22-C23-C24-C25 |
| 6   | B     | 504 | DLX  | C29-C30-C31-C32 |
| 6   | B     | 504 | DLX  | C25-C26-C27-C44 |
| 6   | B     | 504 | DLX  | C45-C23-C24-C25 |
| 6   | B     | 504 | DLX  | C21-C22-C23-C45 |
| 6   | B     | 504 | DLX  | C21-C22-C23-C24 |
| 6   | B     | 504 | DLX  | C17-C18-C19-C46 |
| 6   | B     | 504 | DLX  | C13-C14-C15-C47 |
| 7   | B     | 506 | PGV  | C03-O11-P-O13   |
| 7   | B     | 506 | PGV  | C03-O11-P-O14   |
| 7   | B     | 506 | PGV  | C04-O12-P-O13   |
| 7   | B     | 506 | PGV  | C2-C1-O01-C02   |
| 7   | E     | 505 | PGV  | C04-O12-P-O14   |
| 7   | E     | 505 | PGV  | O03-C01-C02-O01 |
| 7   | E     | 505 | PGV  | C04-C05-C06-O06 |
| 7   | B     | 505 | PGV  | C04-O12-P-O14   |
| 7   | B     | 505 | PGV  | O03-C01-C02-O01 |
| 7   | B     | 505 | PGV  | C04-C05-C06-O06 |
| 8   | F     | 302 | HEC  | C1A-C2A-CAA-CBA |
| 5   | B     | 501 | HEM  | C3D-CAD-CBD-CGD |
| 6   | C     | 301 | DLX  | C29-C30-C31-C43 |
| 6   | C     | 301 | DLX  | C25-C26-C27-C44 |
| 6   | C     | 301 | DLX  | C45-C23-C24-C25 |
| 6   | C     | 301 | DLX  | C21-C22-C23-C45 |
| 6   | C     | 301 | DLX  | C21-C22-C23-C24 |
| 6   | C     | 301 | DLX  | C17-C18-C19-C46 |
| 6   | C     | 301 | DLX  | C17-C18-C19-C20 |
| 6   | C     | 301 | DLX  | C13-C14-C15-C47 |
| 6   | E     | 503 | DLX  | C45-C23-C24-C25 |
| 6   | E     | 503 | DLX  | C22-C23-C24-C25 |
| 6   | E     | 504 | DLX  | C29-C30-C31-C32 |
| 6   | E     | 504 | DLX  | C25-C26-C27-C44 |
| 6   | E     | 504 | DLX  | C45-C23-C24-C25 |
| 6   | E     | 504 | DLX  | C21-C22-C23-C45 |
| 6   | E     | 504 | DLX  | C21-C22-C23-C24 |
| 6   | E     | 504 | DLX  | C17-C18-C19-C46 |

Continued on next page...

Continued from previous page...

| Mol | Chain | Res | Type | Atoms           |
|-----|-------|-----|------|-----------------|
| 6   | E     | 504 | DLX  | C13-C14-C15-C47 |
| 7   | B     | 506 | PGV  | O02-C1-O01-C02  |
| 6   | B     | 504 | DLX  | C43-C31-C32-C33 |
| 6   | E     | 504 | DLX  | C43-C31-C32-C33 |
| 6   | B     | 504 | DLX  | C25-C26-C27-C28 |
| 6   | B     | 504 | DLX  | C17-C18-C19-C20 |
| 6   | E     | 504 | DLX  | C25-C26-C27-C28 |
| 6   | E     | 504 | DLX  | C17-C18-C19-C20 |
| 6   | B     | 503 | DLX  | C31-C32-C33-C34 |
| 6   | E     | 503 | DLX  | C31-C32-C33-C34 |
| 6   | F     | 301 | DLX  | C23-C24-C25-C26 |
| 6   | F     | 301 | DLX  | C15-C16-C17-C18 |
| 6   | B     | 504 | DLX  | C19-C20-C21-C22 |
| 6   | B     | 504 | DLX  | C15-C16-C17-C18 |
| 6   | C     | 301 | DLX  | C23-C24-C25-C26 |
| 6   | C     | 301 | DLX  | C15-C16-C17-C18 |
| 6   | E     | 504 | DLX  | C19-C20-C21-C22 |
| 6   | E     | 504 | DLX  | C15-C16-C17-C18 |
| 6   | F     | 301 | DLX  | C25-C26-C27-C28 |
| 6   | C     | 301 | DLX  | C25-C26-C27-C28 |
| 7   | B     | 506 | PGV  | O05-C05-C06-O06 |
| 6   | B     | 503 | DLX  | C19-C20-C21-C22 |
| 6   | E     | 503 | DLX  | C19-C20-C21-C22 |
| 6   | F     | 301 | DLX  | C36-C37-C38-C39 |
| 6   | C     | 301 | DLX  | C36-C37-C38-C39 |
| 7   | B     | 506 | PGV  | C04-O12-P-O11   |
| 7   | E     | 505 | PGV  | C04-O12-P-O11   |
| 7   | B     | 505 | PGV  | C04-O12-P-O11   |
| 7   | B     | 506 | PGV  | C2-C3-C4-C5     |
| 7   | B     | 506 | PGV  | C5-C6-C7-C8     |
| 7   | B     | 506 | PGV  | C29-C30-C31-C32 |
| 7   | B     | 506 | PGV  | C04-C05-C06-O06 |
| 6   | F     | 301 | DLX  | C47-C15-C16-C17 |
| 6   | C     | 301 | DLX  | C47-C15-C16-C17 |
| 7   | B     | 506 | PGV  | C24-C25-C26-C27 |
| 7   | B     | 506 | PGV  | C23-C24-C25-C26 |
| 7   | B     | 506 | PGV  | C6-C7-C8-C9     |
| 7   | E     | 505 | PGV  | C28-C29-C30-C31 |
| 7   | B     | 506 | PGV  | C27-C28-C29-C30 |
| 7   | B     | 505 | PGV  | C28-C29-C30-C31 |
| 6   | B     | 503 | DLX  | C37-C38-C39-C40 |
| 6   | E     | 503 | DLX  | C37-C38-C39-C40 |

Continued on next page...

Continued from previous page...

| Mol | Chain | Res | Type | Atoms           |
|-----|-------|-----|------|-----------------|
| 7   | B     | 506 | PGV  | C7-C8-C9-C10    |
| 7   | B     | 506 | PGV  | C1-C2-C3-C4     |
| 6   | F     | 301 | DLX  | C26-C27-C28-C29 |
| 6   | F     | 301 | DLX  | C14-C15-C16-C17 |
| 6   | C     | 301 | DLX  | C26-C27-C28-C29 |
| 6   | C     | 301 | DLX  | C14-C15-C16-C17 |
| 6   | B     | 503 | DLX  | C37-C38-C39-C41 |
| 6   | E     | 503 | DLX  | C37-C38-C39-C41 |
| 6   | F     | 301 | DLX  | C13-C14-C15-C16 |
| 6   | C     | 301 | DLX  | C13-C14-C15-C16 |
| 7   | B     | 506 | PGV  | C14-C15-C16-C17 |
| 7   | E     | 505 | PGV  | C25-C26-C27-C28 |
| 7   | B     | 505 | PGV  | C25-C26-C27-C28 |
| 7   | B     | 506 | PGV  | C19-C20-C21-C22 |
| 6   | F     | 301 | DLX  | C43-C31-C32-C33 |
| 6   | C     | 301 | DLX  | C43-C31-C32-C33 |
| 6   | F     | 301 | DLX  | C33-C34-C35-C42 |
| 6   | C     | 301 | DLX  | C33-C34-C35-C42 |
| 7   | B     | 506 | PGV  | C03-O11-P-O12   |
| 6   | F     | 301 | DLX  | C04-C05-C13-C14 |
| 6   | B     | 503 | DLX  | C04-C05-C13-C14 |
| 6   | C     | 301 | DLX  | C04-C05-C13-C14 |
| 6   | E     | 503 | DLX  | C04-C05-C13-C14 |
| 7   | B     | 506 | PGV  | O03-C01-C02-C03 |
| 7   | E     | 505 | PGV  | O03-C01-C02-C03 |
| 7   | B     | 505 | PGV  | O03-C01-C02-C03 |
| 6   | B     | 504 | DLX  | C05-C13-C14-C15 |
| 6   | E     | 504 | DLX  | C05-C13-C14-C15 |
| 7   | B     | 506 | PGV  | C15-C16-C17-C18 |
| 6   | B     | 504 | DLX  | C14-C15-C16-C17 |
| 6   | E     | 504 | DLX  | C14-C15-C16-C17 |
| 7   | E     | 505 | PGV  | O05-C05-C06-O06 |
| 7   | B     | 505 | PGV  | O05-C05-C06-O06 |
| 7   | E     | 505 | PGV  | C21-C22-C23-C24 |
| 7   | B     | 505 | PGV  | C21-C22-C23-C24 |
| 7   | B     | 506 | PGV  | C31-C32-C33-C34 |
| 6   | F     | 301 | DLX  | C29-C30-C31-C32 |
| 6   | C     | 301 | DLX  | C29-C30-C31-C32 |
| 7   | E     | 505 | PGV  | C20-C19-O03-C01 |
| 7   | B     | 505 | PGV  | C20-C19-O03-C01 |
| 6   | F     | 301 | DLX  | C33-C34-C35-C36 |
| 6   | B     | 504 | DLX  | C33-C34-C35-C36 |

Continued on next page...

Continued from previous page...

| Mol | Chain | Res | Type | Atoms           |
|-----|-------|-----|------|-----------------|
| 6   | C     | 301 | DLX  | C33-C34-C35-C36 |
| 6   | E     | 504 | DLX  | C33-C34-C35-C36 |
| 7   | B     | 506 | PGV  | C28-C29-C30-C31 |
| 7   | B     | 506 | PGV  | C01-C02-C03-O11 |
| 7   | E     | 505 | PGV  | C19-C20-C21-C22 |
| 7   | B     | 505 | PGV  | C19-C20-C21-C22 |
| 7   | B     | 506 | PGV  | C26-C27-C28-C29 |
| 7   | E     | 505 | PGV  | C26-C27-C28-C29 |
| 7   | B     | 505 | PGV  | C26-C27-C28-C29 |
| 7   | B     | 506 | PGV  | O01-C02-C03-O11 |
| 7   | E     | 505 | PGV  | C11-C10-C9-C8   |
| 7   | B     | 505 | PGV  | C11-C10-C9-C8   |
| 7   | E     | 505 | PGV  | O04-C19-O03-C01 |
| 7   | B     | 505 | PGV  | O04-C19-O03-C01 |
| 7   | B     | 506 | PGV  | C13-C14-C15-C16 |
| 6   | B     | 503 | DLX  | C36-C37-C38-C39 |
| 6   | E     | 503 | DLX  | C36-C37-C38-C39 |
| 6   | B     | 503 | DLX  | C06-C05-C13-C14 |
| 6   | E     | 503 | DLX  | C06-C05-C13-C14 |
| 7   | B     | 506 | PGV  | O03-C01-C02-O01 |
| 6   | B     | 504 | DLX  | C42-C35-C36-C37 |
| 6   | E     | 504 | DLX  | C42-C35-C36-C37 |
| 7   | B     | 506 | PGV  | C04-O12-P-O14   |
| 7   | E     | 505 | PGV  | C04-O12-P-O13   |
| 7   | B     | 505 | PGV  | C04-O12-P-O13   |
| 8   | C     | 302 | HEC  | C3A-C2A-CAA-CBA |
| 8   | F     | 302 | HEC  | C3A-C2A-CAA-CBA |
| 6   | B     | 504 | DLX  | C33-C34-C35-C42 |
| 6   | E     | 504 | DLX  | C33-C34-C35-C42 |
| 6   | B     | 504 | DLX  | C44-C27-C28-C29 |
| 6   | E     | 504 | DLX  | C44-C27-C28-C29 |
| 7   | B     | 506 | PGV  | C12-C13-C14-C15 |
| 7   | B     | 506 | PGV  | O12-C04-C05-C06 |
| 6   | B     | 504 | DLX  | C27-C28-C29-C30 |
| 6   | E     | 504 | DLX  | C27-C28-C29-C30 |
| 7   | B     | 506 | PGV  | C21-C22-C23-C24 |
| 7   | B     | 506 | PGV  | C20-C21-C22-C23 |
| 6   | F     | 301 | DLX  | C06-C05-C13-C14 |
| 6   | C     | 301 | DLX  | C06-C05-C13-C14 |
| 6   | E     | 503 | DLX  | C35-C36-C37-C38 |
| 6   | B     | 503 | DLX  | C35-C36-C37-C38 |
| 6   | E     | 504 | DLX  | C35-C36-C37-C38 |

Continued on next page...

Continued from previous page...

| Mol | Chain | Res | Type | Atoms           |
|-----|-------|-----|------|-----------------|
| 6   | B     | 504 | DLX  | C35-C36-C37-C38 |
| 7   | E     | 505 | PGV  | O03-C19-C20-C21 |
| 7   | B     | 505 | PGV  | O03-C19-C20-C21 |
| 7   | E     | 505 | PGV  | O01-C1-C2-C3    |
| 7   | B     | 505 | PGV  | O01-C1-C2-C3    |
| 6   | F     | 301 | DLX  | C16-C17-C18-C19 |
| 6   | B     | 504 | DLX  | C28-C29-C30-C31 |
| 6   | C     | 301 | DLX  | C16-C17-C18-C19 |
| 6   | E     | 504 | DLX  | C28-C29-C30-C31 |
| 7   | E     | 505 | PGV  | C22-C23-C24-C25 |
| 7   | B     | 505 | PGV  | C22-C23-C24-C25 |
| 7   | E     | 505 | PGV  | O04-C19-C20-C21 |
| 7   | B     | 505 | PGV  | O04-C19-C20-C21 |
| 6   | B     | 504 | DLX  | C32-C33-C34-C35 |
| 6   | E     | 504 | DLX  | C32-C33-C34-C35 |
| 7   | B     | 505 | PGV  | C20-C21-C22-C23 |
| 7   | E     | 505 | PGV  | C20-C21-C22-C23 |

There are no ring outliers.

14 monomers are involved in 57 short contacts:

| Mol | Chain | Res | Type | Clashes | Symm-Clashes |
|-----|-------|-----|------|---------|--------------|
| 4   | A     | 501 | FES  | 1       | 0            |
| 5   | B     | 501 | HEM  | 4       | 0            |
| 5   | B     | 502 | HEM  | 3       | 0            |
| 6   | B     | 503 | DLX  | 13      | 0            |
| 7   | B     | 505 | PGV  | 1       | 0            |
| 7   | B     | 506 | PGV  | 14      | 0            |
| 8   | C     | 302 | HEC  | 9       | 0            |
| 4   | D     | 501 | FES  | 1       | 0            |
| 5   | E     | 501 | HEM  | 4       | 0            |
| 5   | E     | 502 | HEM  | 3       | 0            |
| 6   | E     | 503 | DLX  | 7       | 0            |
| 6   | E     | 504 | DLX  | 1       | 0            |
| 7   | E     | 505 | PGV  | 1       | 0            |
| 8   | F     | 302 | HEC  | 8       | 0            |

The following is a two-dimensional graphical depiction of Mogul quality analysis of bond lengths, bond angles, torsion angles, and ring geometry for all instances of the Ligand of Interest. In addition, ligands with molecular weight > 250 and outliers as shown on the validation Tables will also be included. For torsion angles, if less than 5% of the Mogul distribution of torsion angles is within 10 degrees of the torsion angle in question, then that torsion angle is considered an outlier.

Any bond that is central to one or more torsion angles identified as an outlier by Mogul will be highlighted in the graph. For rings, the root-mean-square deviation (RMSD) between the ring in question and similar rings identified by Mogul is calculated over all ring torsion angles. If the average RMSD is greater than 60 degrees and the minimal RMSD between the ring in question and any Mogul-identified rings is also greater than 60 degrees, then that ring is considered an outlier. The outliers are highlighted in purple. The color gray indicates Mogul did not find sufficient equivalents in the CSD to analyse the geometry.

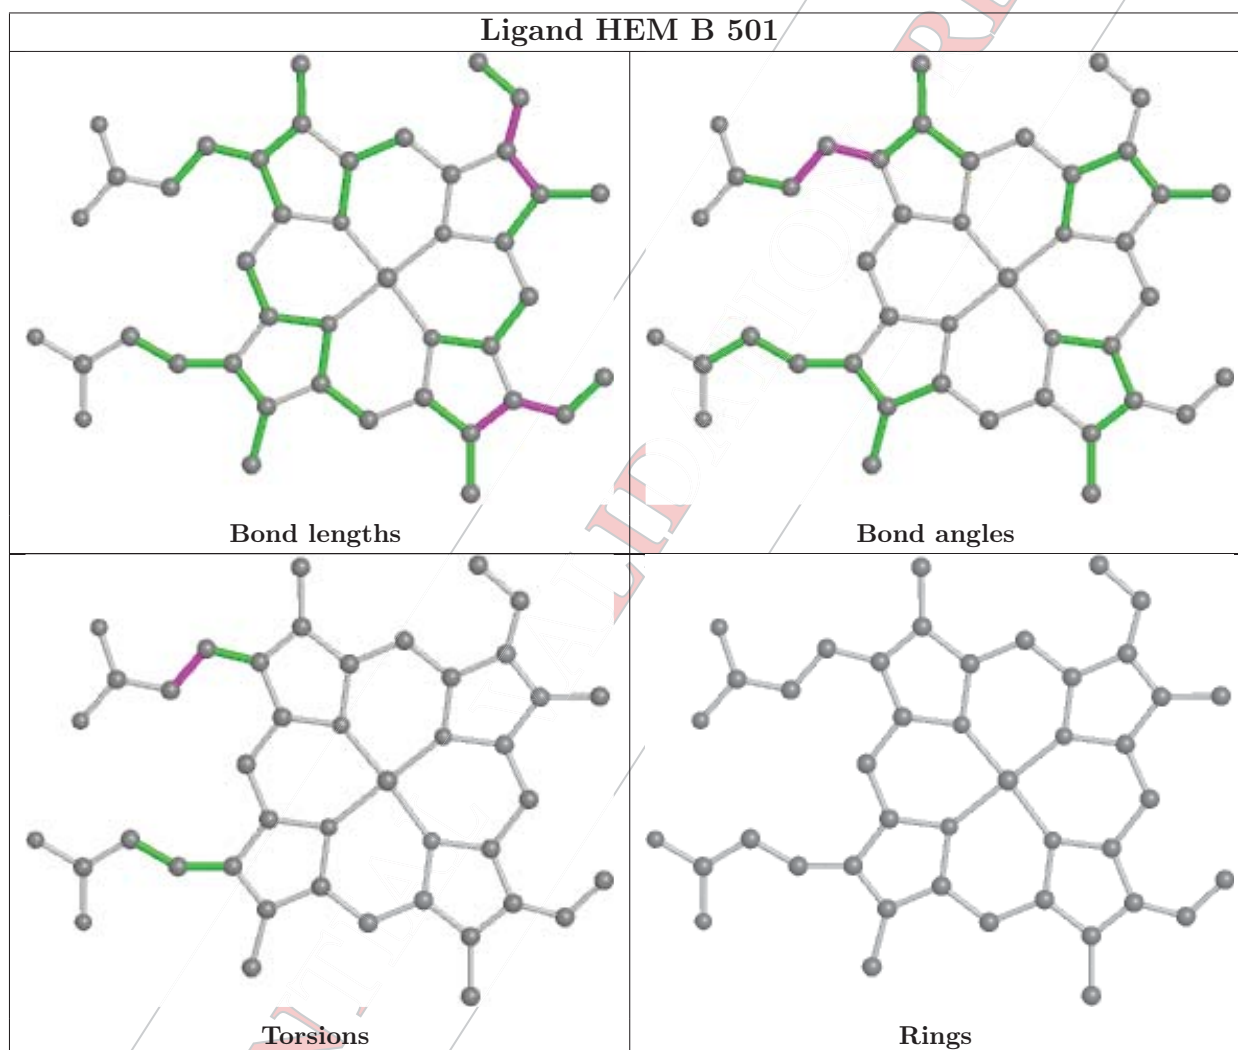

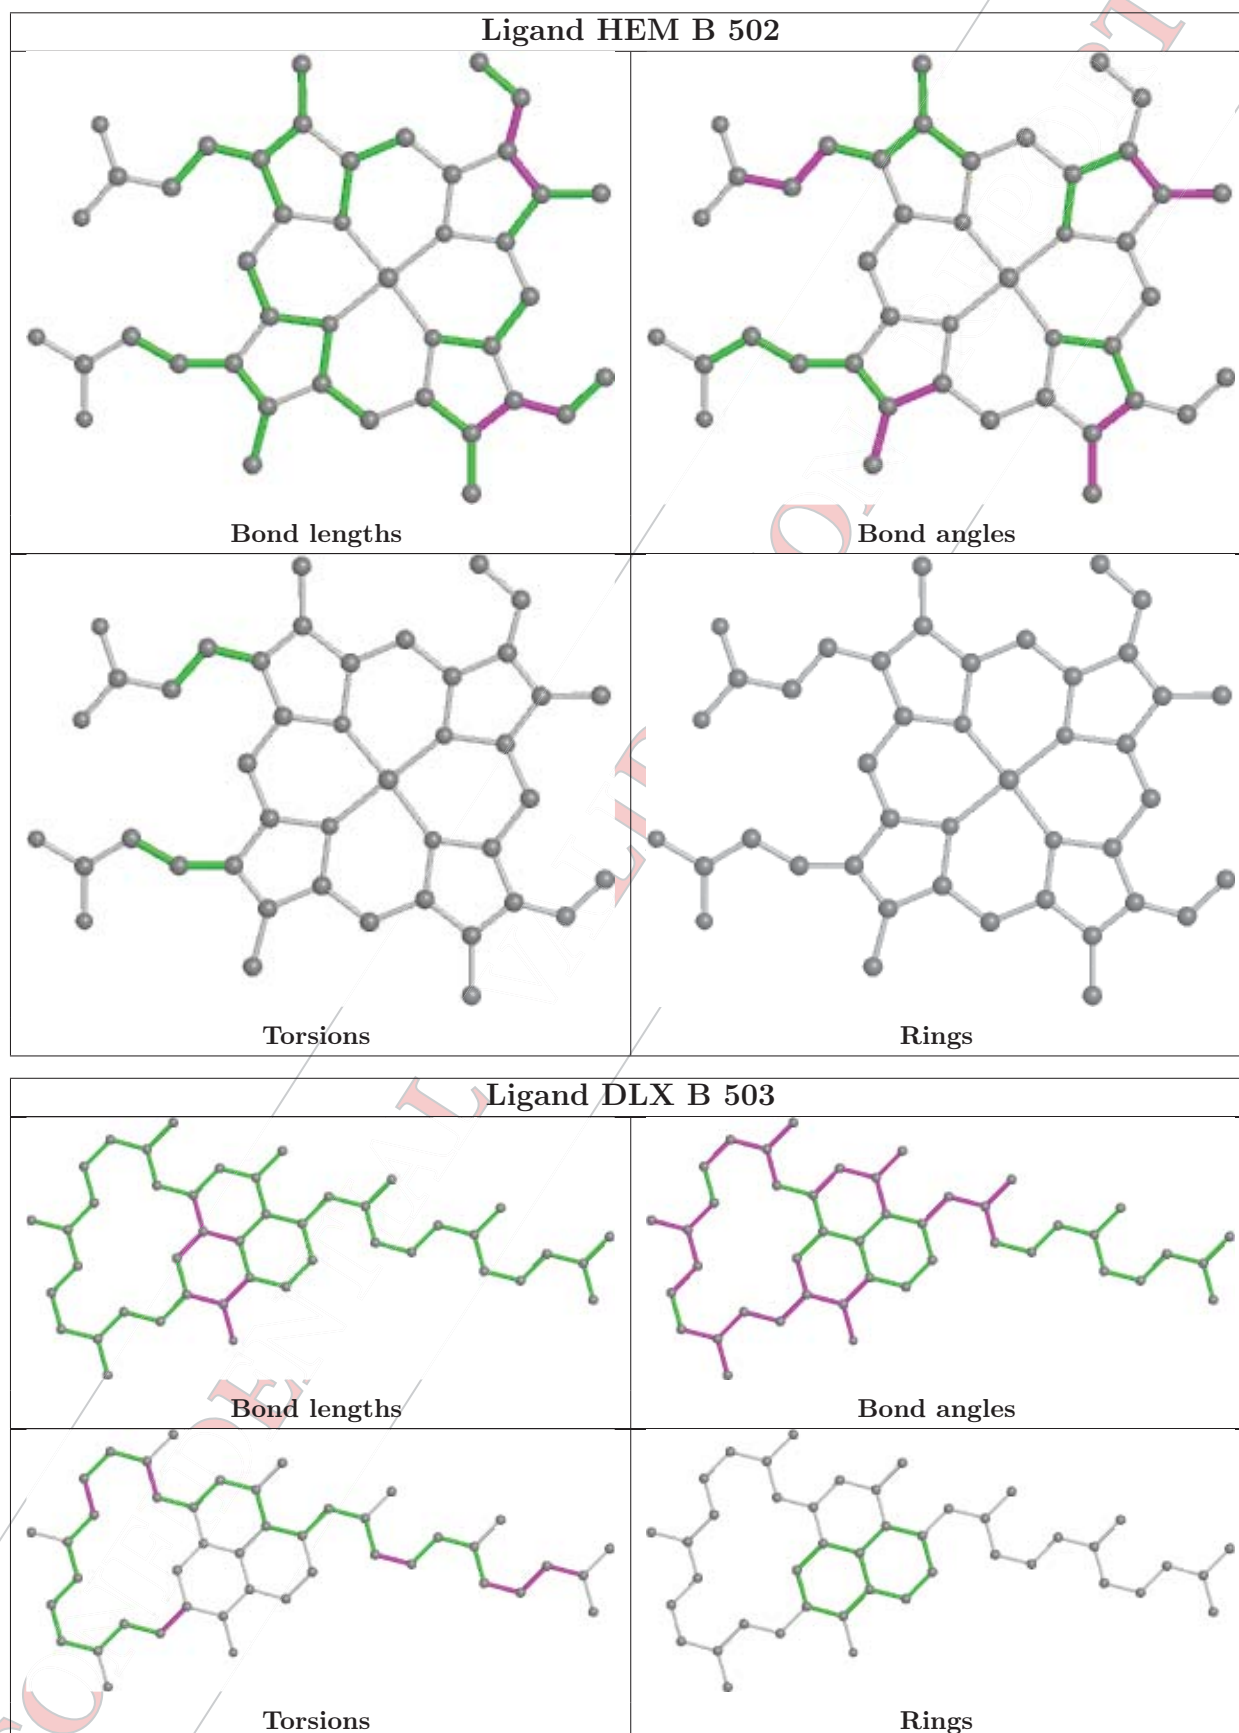



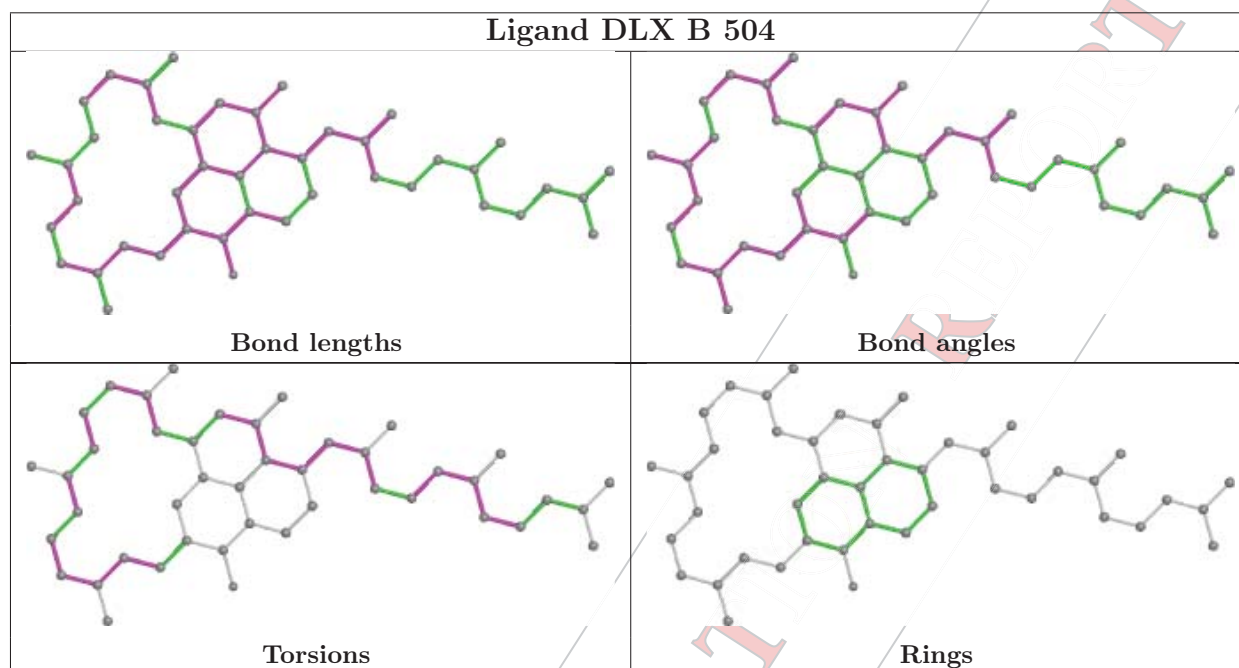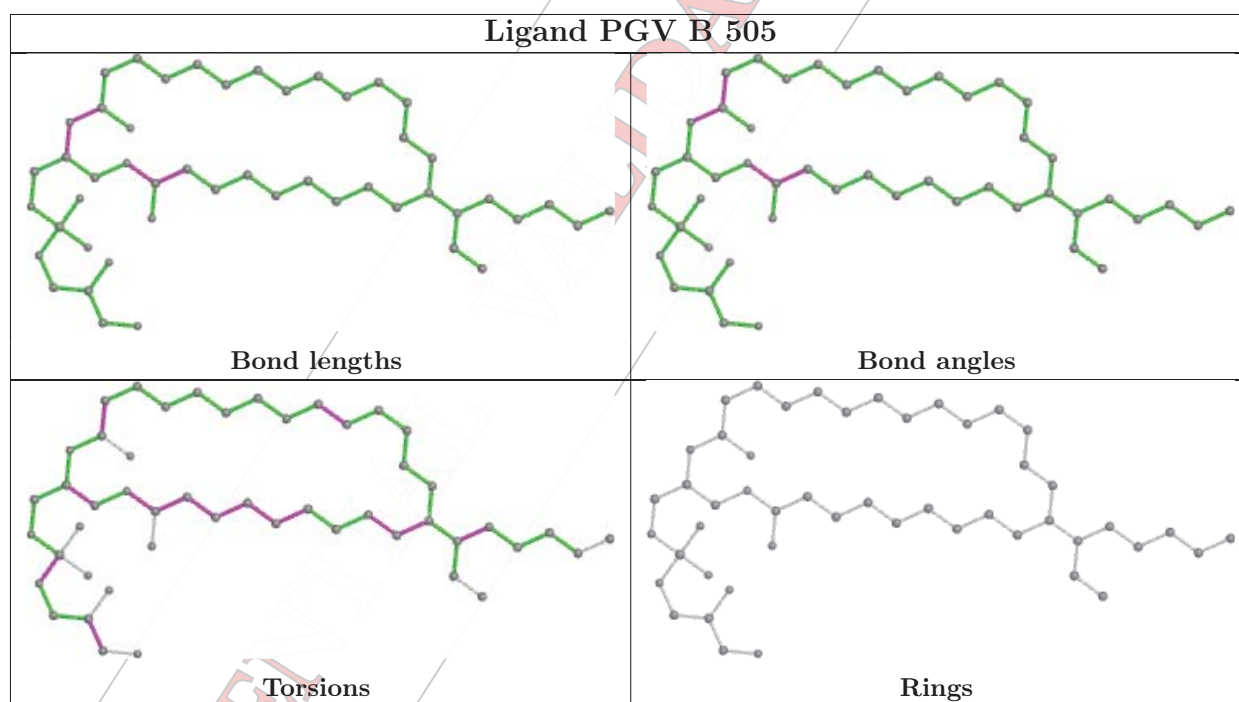

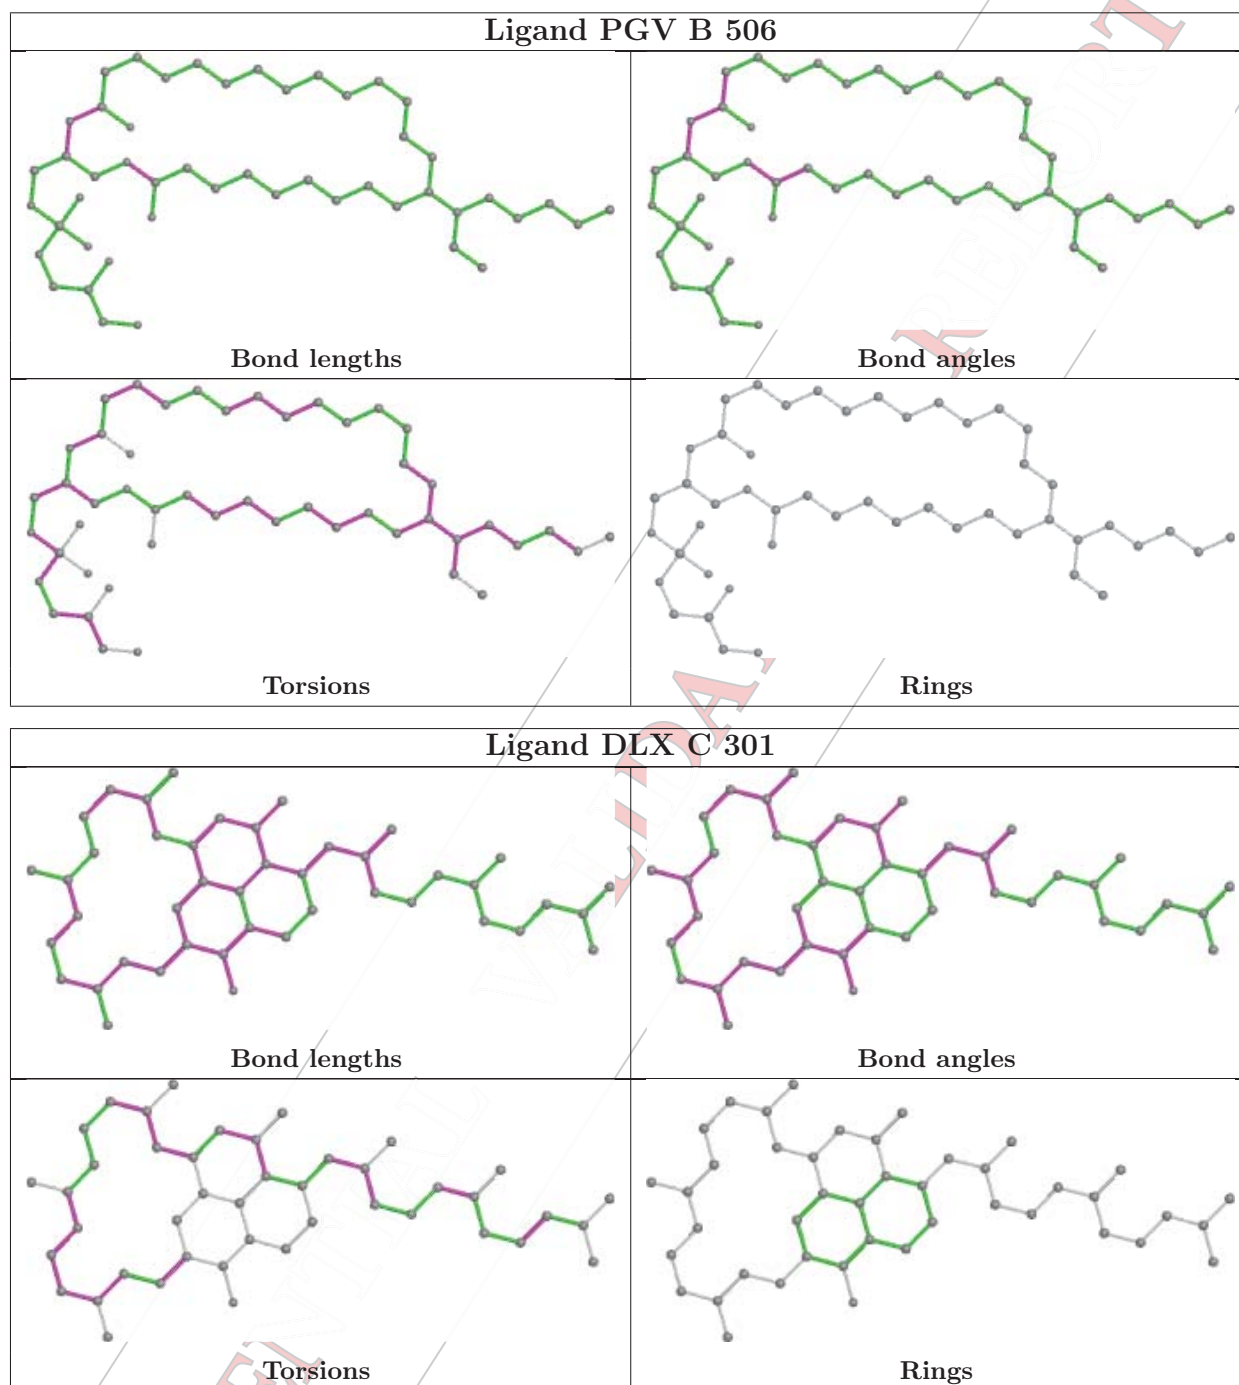

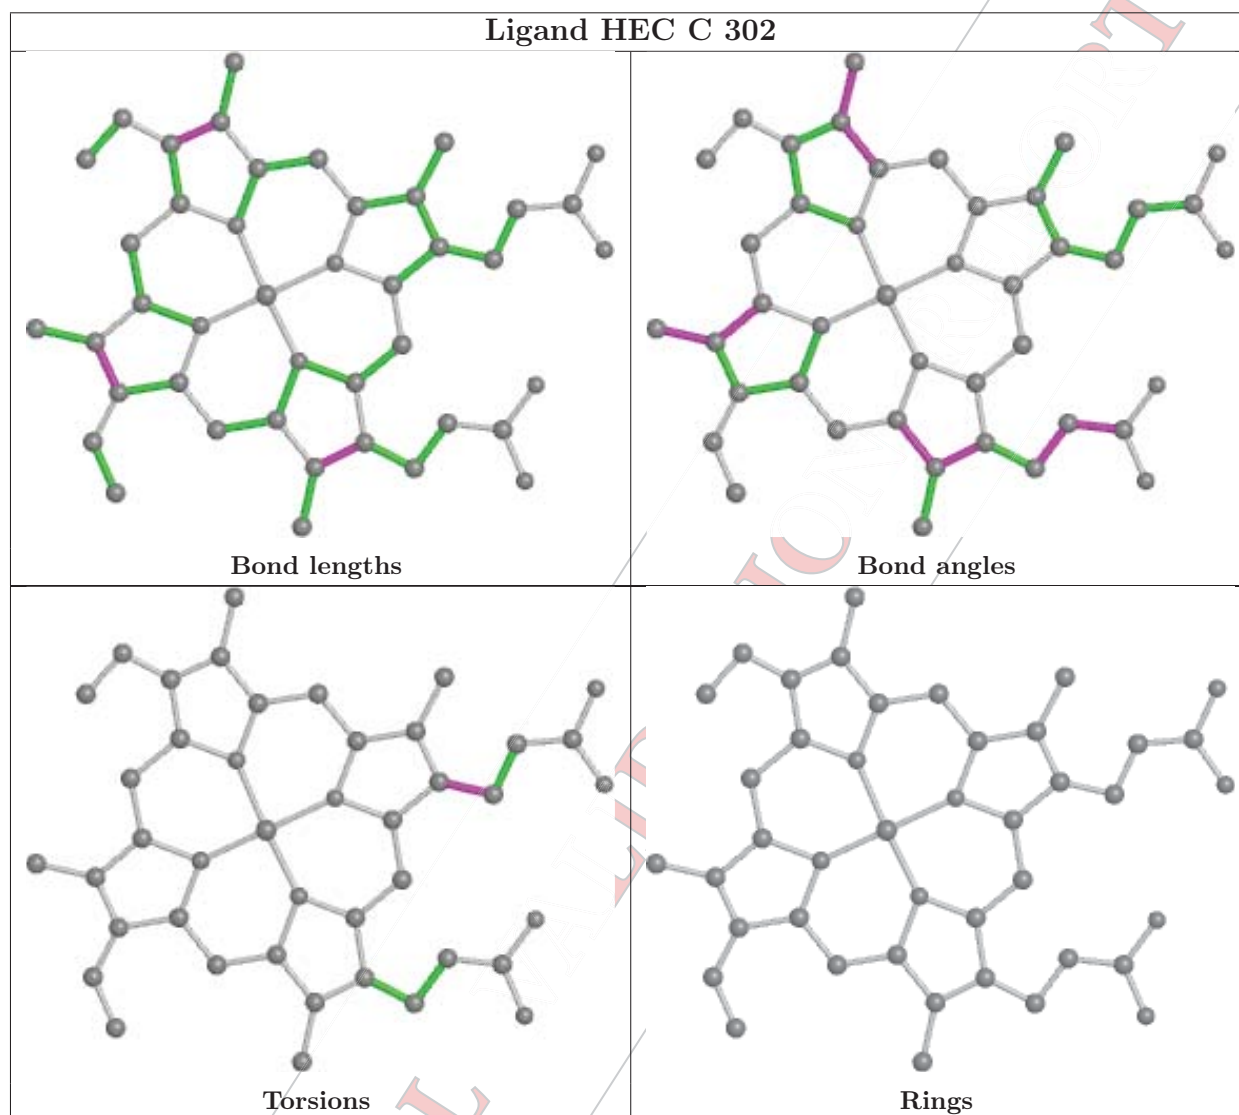

CONFIDENTIAL

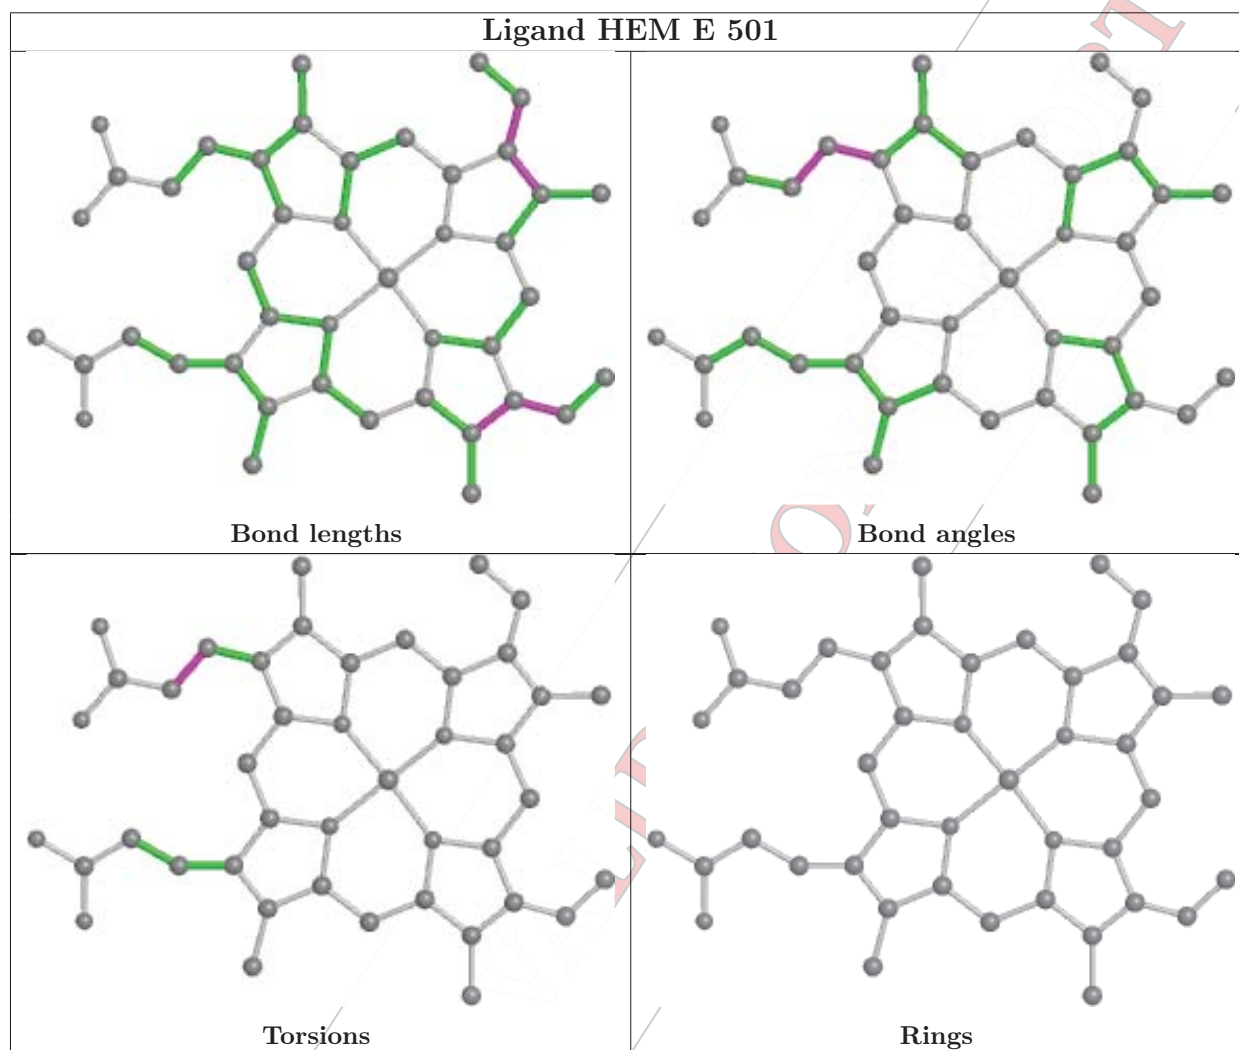

CONFIDENTIAL

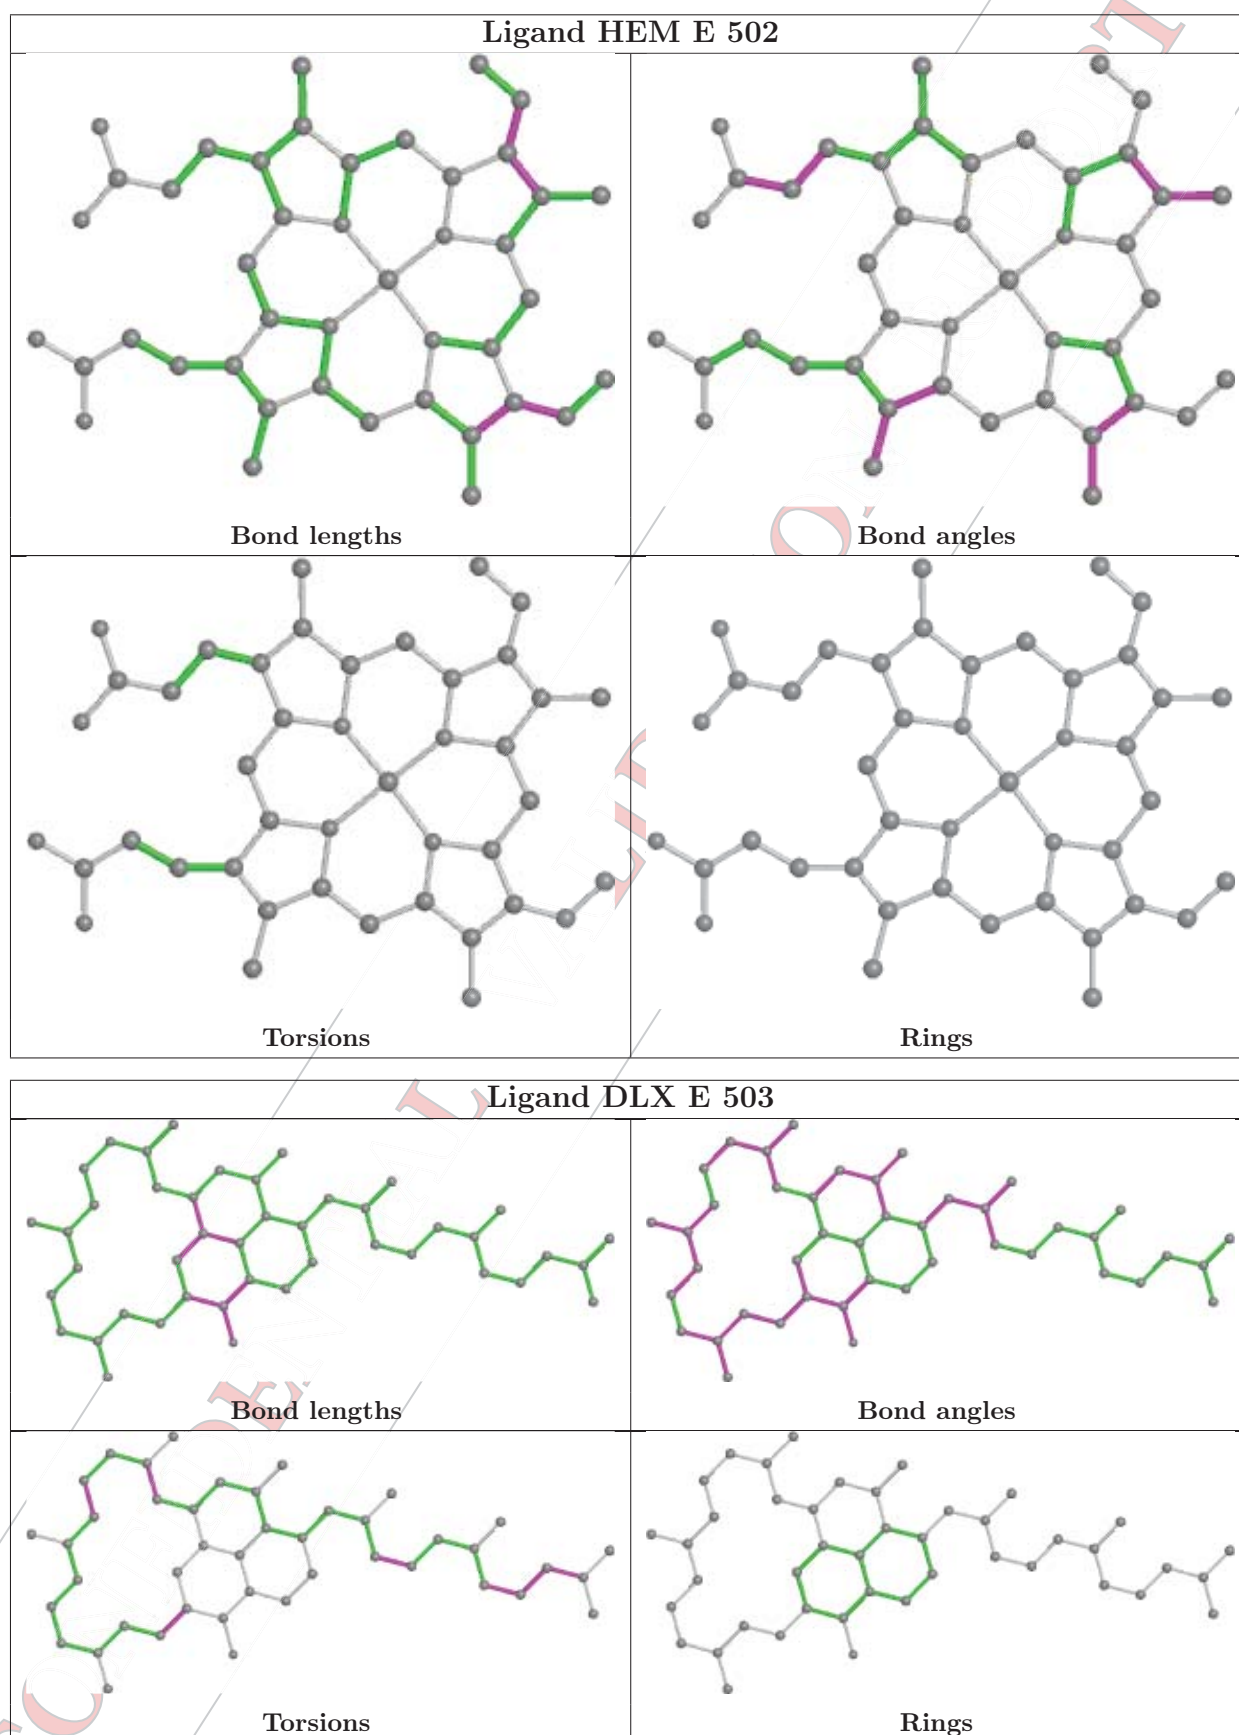

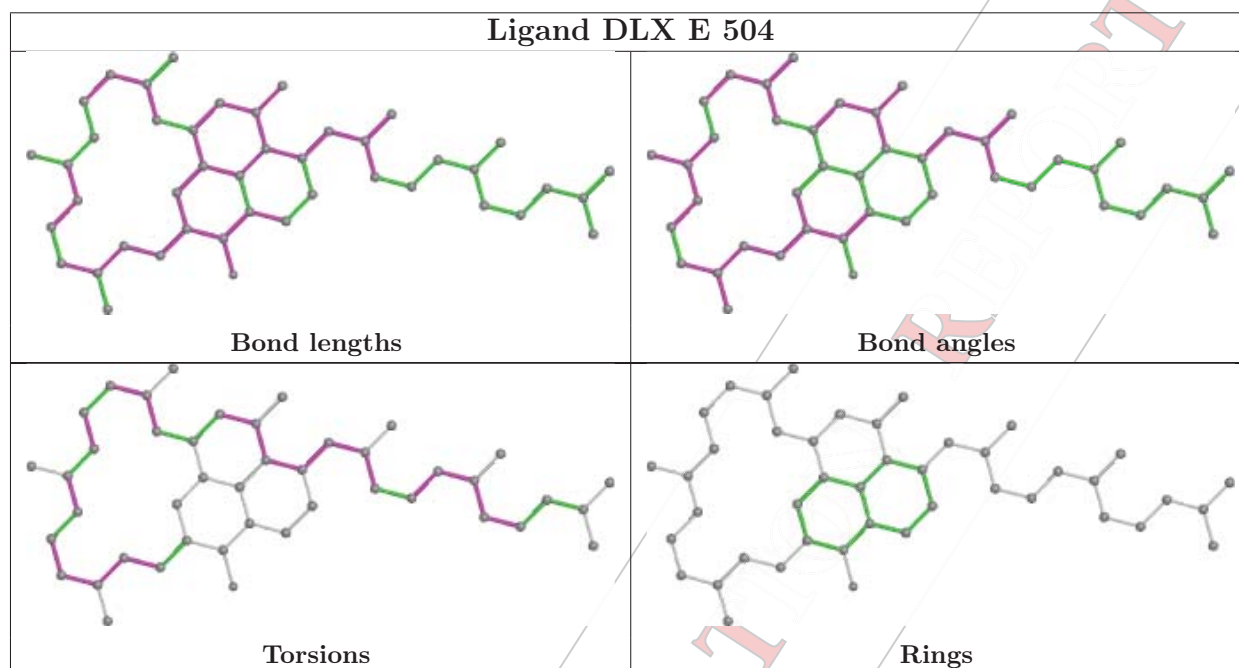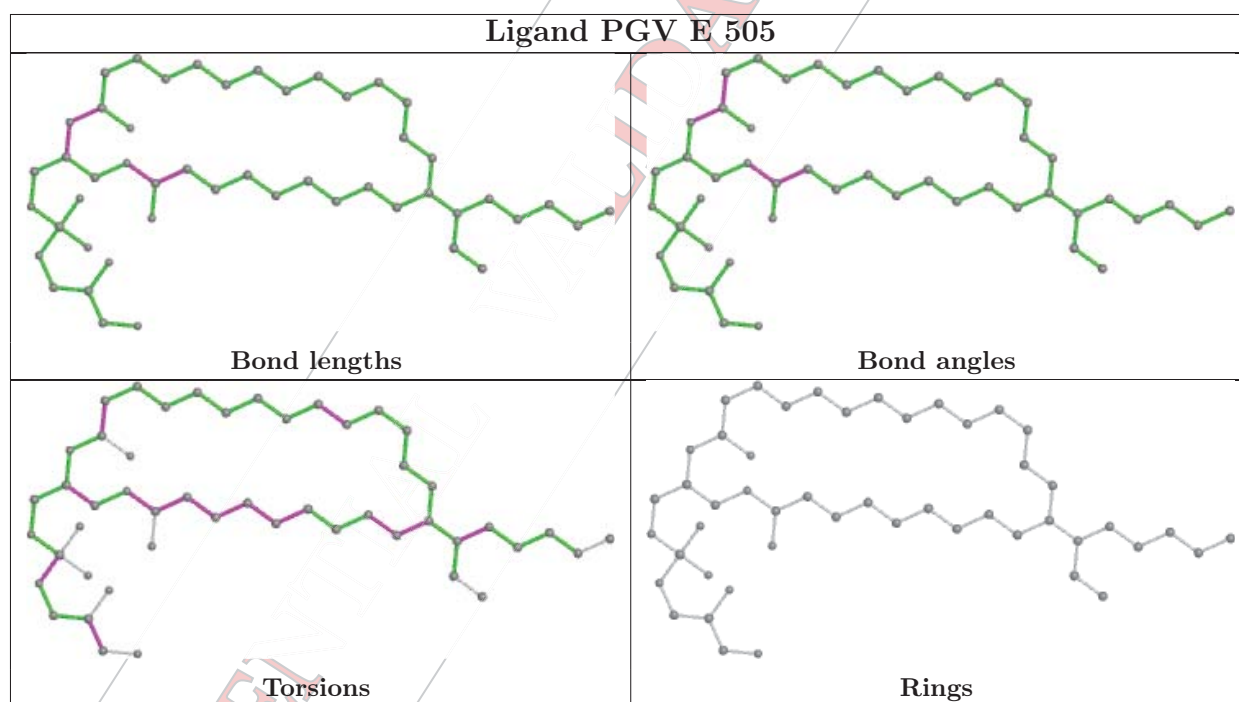

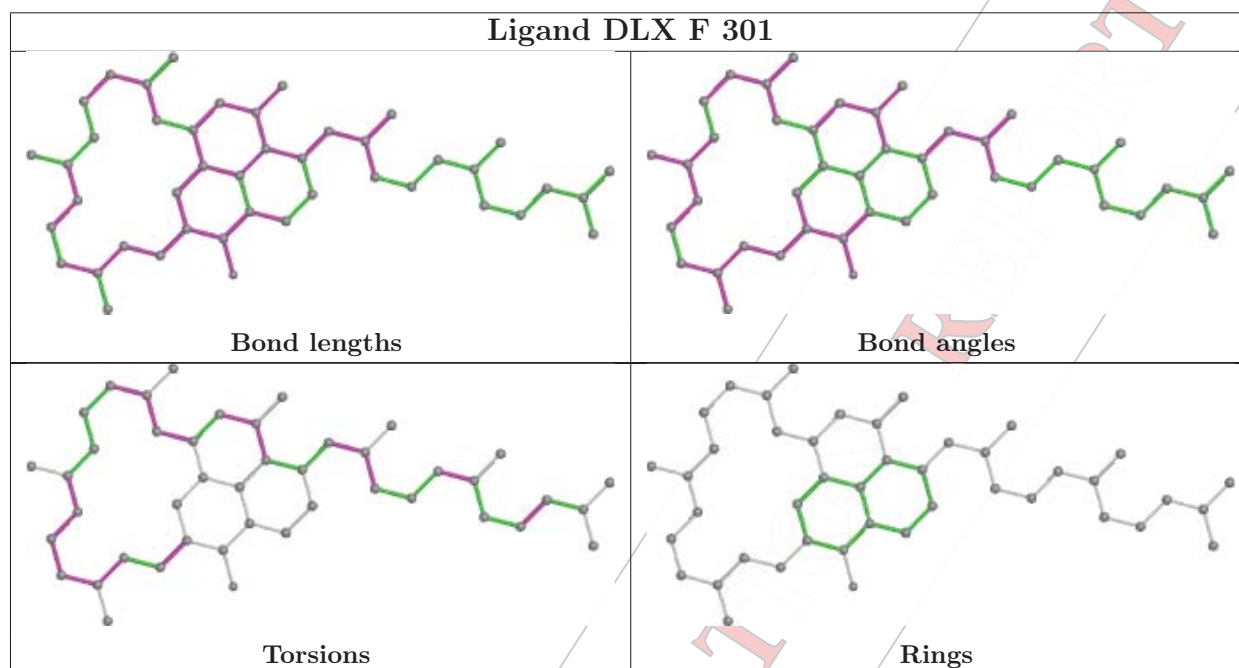

CONFIDENTIAL VALIDATION REPORT

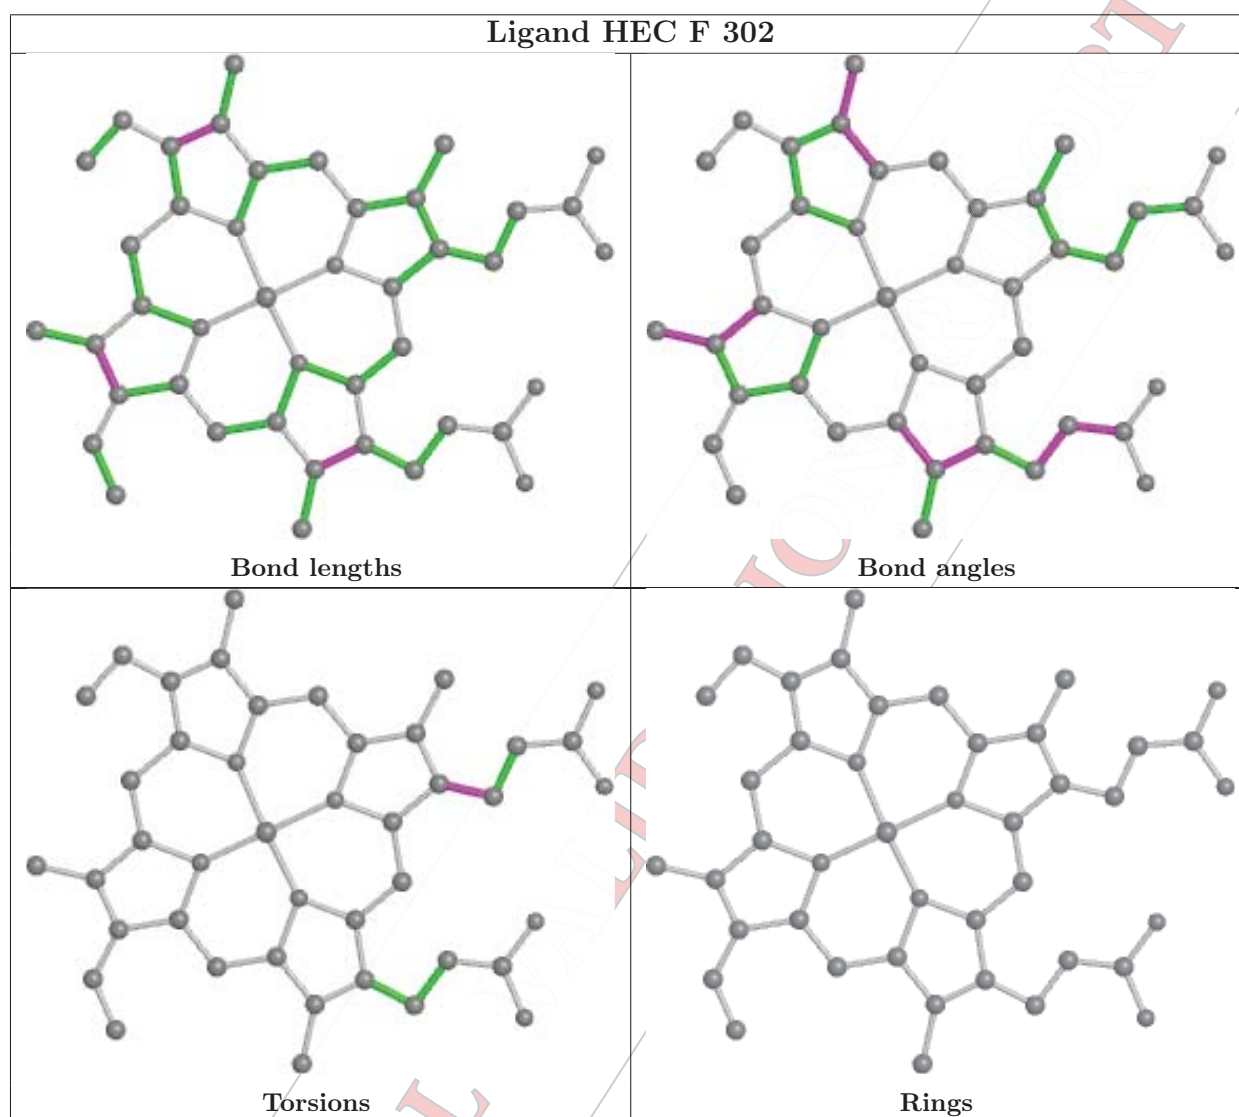

### 5.7 Other polymers [\(i\)](#)

There are no such residues in this entry.

### 5.8 Polymer linkage issues [\(i\)](#)

There are no chain breaks in this entry.





# Full wwPDB/EMDatabank EM Map/Model Validation Report ⓘ

Aug 14, 2019 – 04:08 PM JST

Deposition ID : D\_1300013263  
PDB ID : *(not yet assigned)*

This is a Full wwPDB/EMDatabank EM Map/Model Validation Report.

This report is produced by the wwPDB Deposition System during initial deposition but before annotation of the structure.

We welcome your comments at [validation@mail.wwpdb.org](mailto:validation@mail.wwpdb.org)

A user guide is available at

<https://www.wwpdb.org/validation/2017/EMValidationReportHelp>

with specific help available everywhere you see the ⓘ symbol.

---

MolProbity : 4.02b-467  
Mogul : 1.8.0 (224370), CSD as540be (2019)  
Percentile statistics : 20171227.v01 (using entries in the PDB archive December 27th 2017)  
Ideal geometry (proteins) : Engh & Huber (2001)  
Ideal geometry (DNA, RNA) : Parkinson et. al. (1996)  
Validation Pipeline (wwPDB-VP) : 2.4

## 1 Overall quality at a glance i

The following experimental techniques were used to determine the structure:  
*ELECTRON MICROSCOPY*

The reported resolution of this entry is unknown.

Percentile scores (ranging between 0-100) for global validation metrics of the entry are shown in the following graphic. The table shows the number of entries on which the scores are based.

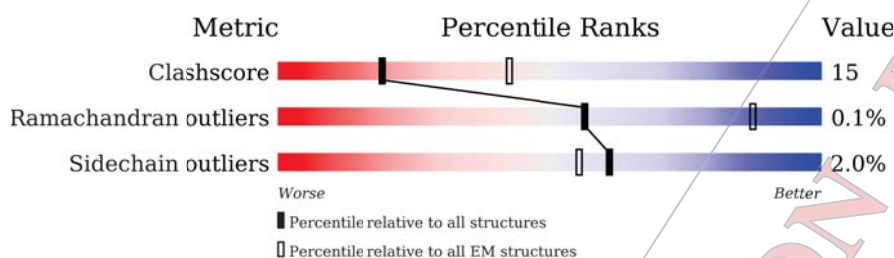

| Metric                | Whole archive (#Entries) | EM structures (#Entries) |
|-----------------------|--------------------------|--------------------------|
| Clashscore            | 136327                   | 1886                     |
| Ramachandran outliers | 132723                   | 1663                     |
| Sidechain outliers    | 132532                   | 1531                     |

The table below summarises the geometric issues observed across the polymeric chains. The red, orange, yellow and green segments on the bar indicate the fraction of residues that contain outliers for  $\geq 3$ , 2, 1 and 0 types of geometric quality criteria. A grey segment represents the fraction of residues that are not modelled. The numeric value for each fraction is indicated below the corresponding segment, with a dot representing fractions  $\leq 5\%$ .

| Mol | Chain | Length | Quality of chain |
|-----|-------|--------|------------------|
| 1   | A     | 181    | 40% 32% 26%      |
| 1   | D     | 181    | 38% 34% 26%      |
| 2   | B     | 410    | 76% 20%          |
| 2   | E     | 410    | 75% 21%          |
| 3   | C     | 240    | 65% 30%          |
| 3   | F     | 240    | 65% 30%          |

The following table lists non-polymeric compounds, carbohydrate monomers and non-standard residues in protein, DNA, RNA chains that are outliers for geometric or electron-density-fit criteria:

| Mol | Type | Chain | Res | Chirality | Geometry | Clashes | Electron density |
|-----|------|-------|-----|-----------|----------|---------|------------------|
| 6   | AMY  | B     | 503 | -         | -        | X       | -                |
| 7   | NQA  | E     | 505 | -         | -        | X       | -                |

PRELIMINARY VALIDATION REPORT

## 2 Entry composition [\(i\)](#)

There are 9 unique types of molecules in this entry. The entry contains 12993 atoms, of which 0 are hydrogens and 0 are deuteriums.

In the tables below, the AltConf column contains the number of residues with at least one atom in alternate conformation and the Trace column contains the number of residues modelled with at most 2 atoms.

- Molecule 1 is a protein called Rieske-I iron sulfur protein.

| Mol | Chain | Residues | Atoms |     |     |     |   | AltConf | Trace |
|-----|-------|----------|-------|-----|-----|-----|---|---------|-------|
|     |       |          | Total | C   | N   | O   | S |         |       |
| 1   | A     | 134      | 1012  | 668 | 169 | 169 | 6 | 0       | 0     |
| 1   | D     | 134      | 1012  | 668 | 169 | 169 | 6 | 0       | 0     |

- Molecule 2 is a protein called cytochrome b subunit.

| Mol | Chain | Residues | Atoms |      |     |     |    | AltConf | Trace |
|-----|-------|----------|-------|------|-----|-----|----|---------|-------|
|     |       |          | Total | C    | N   | O   | S  |         |       |
| 2   | B     | 395      | 3226  | 2208 | 491 | 515 | 12 | 0       | 0     |
| 2   | E     | 395      | 3226  | 2208 | 491 | 515 | 12 | 0       | 0     |

- Molecule 3 is a protein called Cytochrome c.

| Mol | Chain | Residues | Atoms |      |     |     |   | AltConf | Trace |
|-----|-------|----------|-------|------|-----|-----|---|---------|-------|
|     |       |          | Total | C    | N   | O   | S |         |       |
| 3   | C     | 236      | 1917  | 1263 | 312 | 334 | 8 | 0       | 0     |
| 3   | F     | 236      | 1917  | 1263 | 312 | 334 | 8 | 0       | 0     |

- Molecule 4 is FE2/S2 (INORGANIC) CLUSTER (three-letter code: FES) (formula: Fe<sub>2</sub>S<sub>2</sub>).

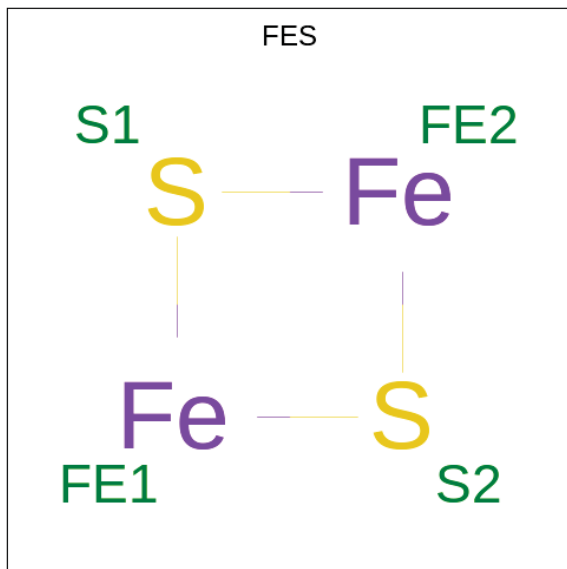

| Mol | Chain | Residues | Atoms |    |   | AltConf |
|-----|-------|----------|-------|----|---|---------|
| 4   | A     | 1        | Total | Fe | S | 0       |
|     |       |          | 4     | 2  | 2 |         |
| 4   | D     | 1        | Total | Fe | S | 0       |
|     |       |          | 4     | 2  | 2 |         |

- Molecule 5 is PROTOPORPHYRIN IX CONTAINING FE (three-letter code: HEM) (formula:  $C_{34}H_{32}FeN_4O_4$ ).

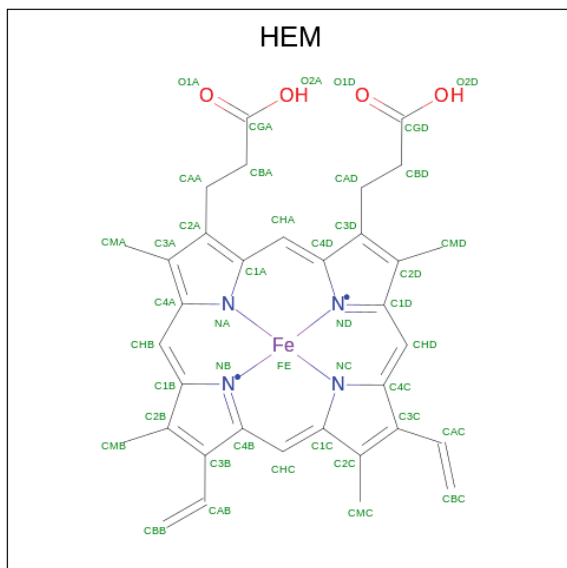

| Mol | Chain | Residues | Atoms |    |    |   | AltConf |   |
|-----|-------|----------|-------|----|----|---|---------|---|
| 5   | B     | 1        | Total | C  | Fe | N | O       | 0 |
|     |       |          | 86    | 68 | 2  | 8 | 8       |   |

*Continued on next page...*

Continued from previous page...

| Mol | Chain | Residues | Atoms |    |    |   |   | AltConf |
|-----|-------|----------|-------|----|----|---|---|---------|
|     |       |          | Total | C  | Fe | N | O |         |
| 5   | B     | 1        | Total | C  | Fe | N | O | 0       |
|     |       |          | 86    | 68 | 2  | 8 | 8 |         |
| 5   | E     | 1        | Total | C  | Fe | N | O | 0       |
|     |       |          | 86    | 68 | 2  | 8 | 8 |         |
| 5   | E     | 1        | Total | C  | Fe | N | O | 0       |
|     |       |          | 86    | 68 | 2  | 8 | 8 |         |

- Molecule 6 is ANTIMYCIN (three-letter code: AMY) (formula:  $C_{27}H_{38}N_2O_9$ ).

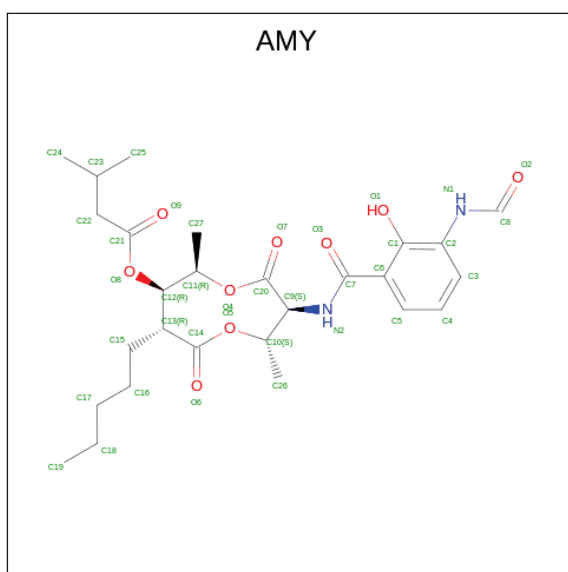

| Mol | Chain | Residues | Atoms |    |   |   | AltConf |
|-----|-------|----------|-------|----|---|---|---------|
|     |       |          | Total | C  | N | O |         |
| 6   | B     | 1        | Total | C  | N | O | 0       |
|     |       |          | 38    | 27 | 2 | 9 |         |
| 6   | E     | 1        | Total | C  | N | O | 0       |
|     |       |          | 38    | 27 | 2 | 9 |         |

- Molecule 7 is a ligand with the chemical component id NQA but there is no existing wwPDB Chemical Component Dictionary definition for NQA. Consequently no firm identification of ligand chemistry can be made. Once the structure is annotated then an identification and diagram will be given here.

| Mol | Chain | Residues | Atoms |    |   | AltConf |
|-----|-------|----------|-------|----|---|---------|
|     |       |          | Total | C  | O |         |
| 7   | B     | 1        | Total | C  | O | 0       |
|     |       |          | 94    | 90 | 4 |         |
| 7   | B     | 1        | Total | C  | O | 0       |
|     |       |          | 94    | 90 | 4 |         |
| 7   | E     | 1        | Total | C  | O | 0       |
|     |       |          | 94    | 90 | 4 |         |

Continued on next page...

Continued from previous page...

| Mol | Chain | Residues | Atoms |    |   | AltConf |
|-----|-------|----------|-------|----|---|---------|
|     |       |          | Total | C  | O |         |
| 7   | E     | 1        | 94    | 90 | 4 | 0       |

- Molecule 8 is (1R)-2-[[[(2S)-2,3-DIHYDROXYPROPYL]OXY}(HYDROXY)PHOSPHORYL]OXY}-1-[(PALMITOYLOXY)METHYL]ETHYL (11E)-OCTADEC-11-ENOATE (three-letter code: PGV) (formula: C<sub>40</sub>H<sub>77</sub>O<sub>10</sub>P).

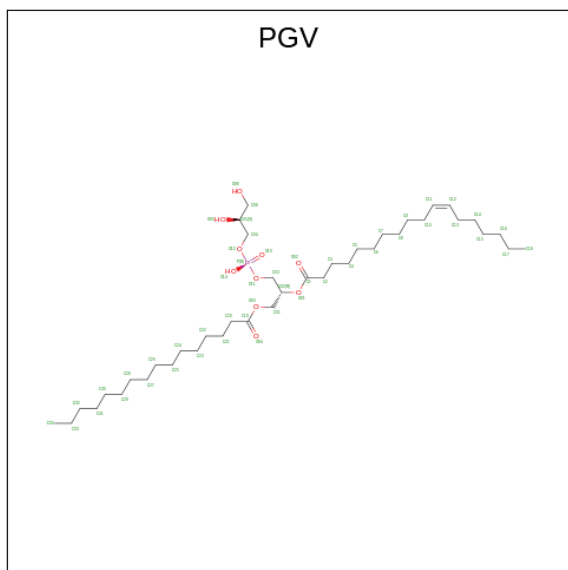

| Mol | Chain | Residues | Atoms |    |    |   | AltConf |
|-----|-------|----------|-------|----|----|---|---------|
|     |       |          | Total | C  | O  | P |         |
| 8   | B     | 1        | 102   | 80 | 20 | 2 | 0       |
| 8   | B     | 1        | 102   | 80 | 20 | 2 | 0       |
| 8   | E     | 1        | 51    | 40 | 10 | 1 | 0       |

- Molecule 9 is HEME C (three-letter code: HEC) (formula: C<sub>34</sub>H<sub>34</sub>FeN<sub>4</sub>O<sub>4</sub>).

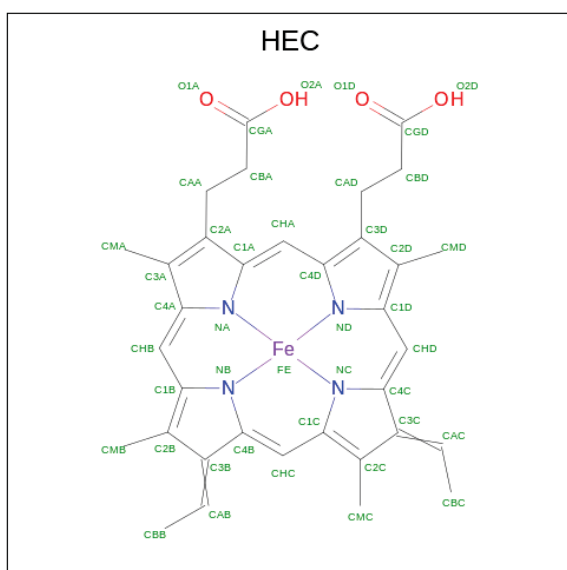

| Mol | Chain | Residues | Atoms       |    |    |   | AltConf |   |
|-----|-------|----------|-------------|----|----|---|---------|---|
|     |       |          | Total       | C  | Fe | N |         | O |
| 9   | C     | 1        | Total<br>43 | 34 | 1  | 4 | 4       | 0 |
| 9   | F     | 1        | Total<br>43 | 34 | 1  | 4 | 4       | 0 |



### 3 Residue-property plots

These plots are drawn for all protein, RNA and DNA chains in the entry. The first graphic for a chain summarises the proportions of the various outlier classes displayed in the second graphic. The second graphic shows the sequence view annotated by issues in geometry. Residues are color-coded according to the number of geometric quality criteria for which they contain at least one outlier: green = 0, yellow = 1, orange = 2 and red = 3 or more. Stretches of 2 or more consecutive residues without any outlier are shown as a green connector. Residues present in the sample, but not in the model, are shown in grey.

- Molecule 1: Rieske-I iron sulfur protein

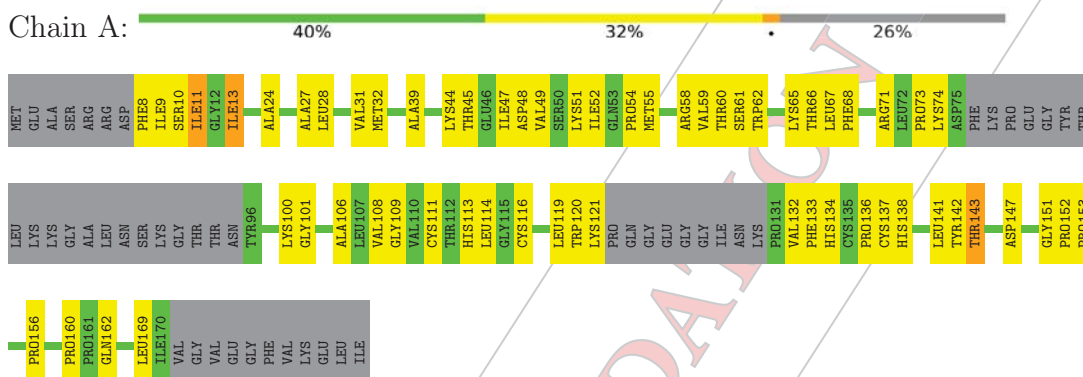

- Molecule 1: Rieske-I iron sulfur protein

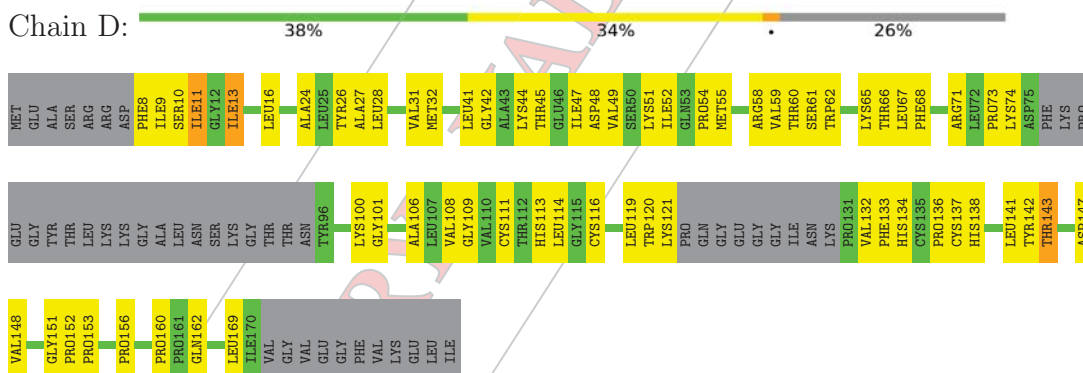

- Molecule 2: cytochrome b subunit

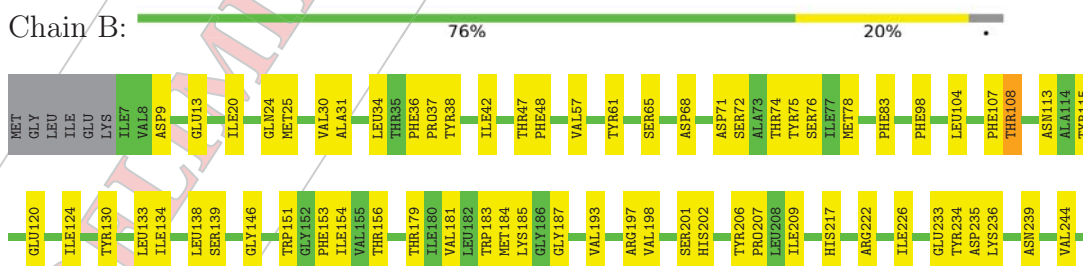

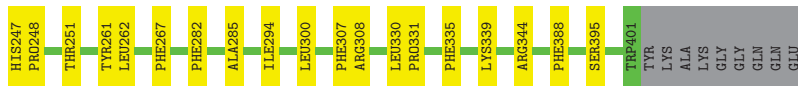

• Molecule 2: cytochrome b subunit

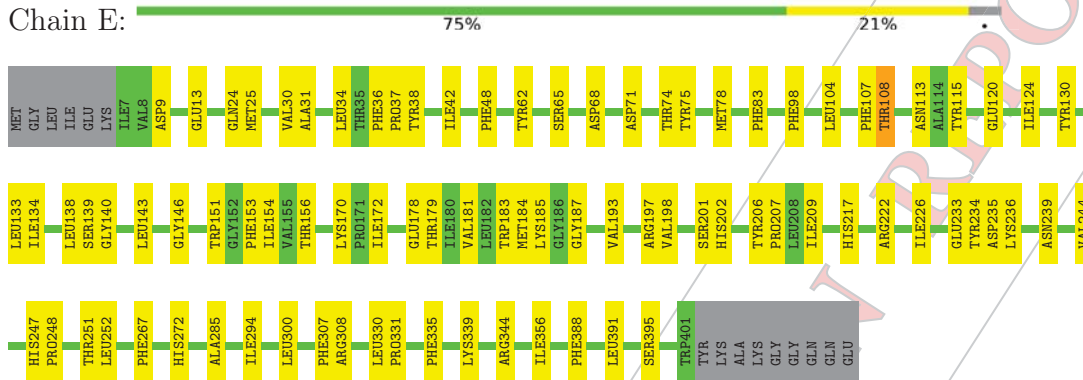

• Molecule 3: Cytochrome c

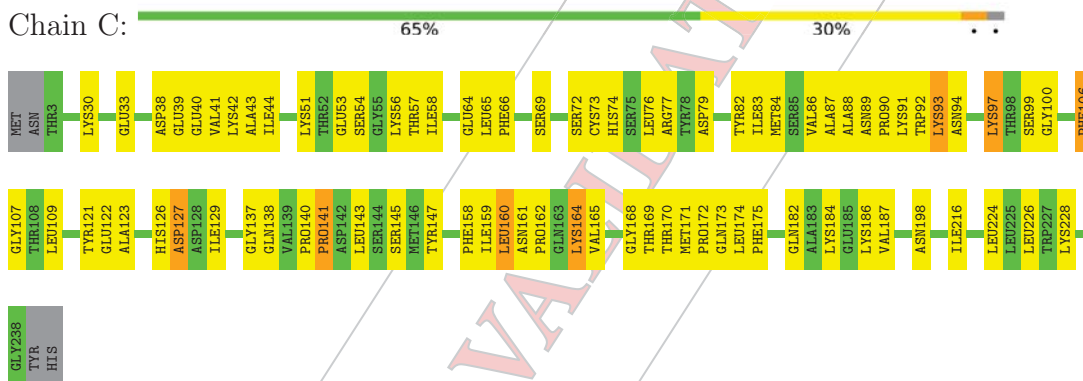

• Molecule 3: Cytochrome c

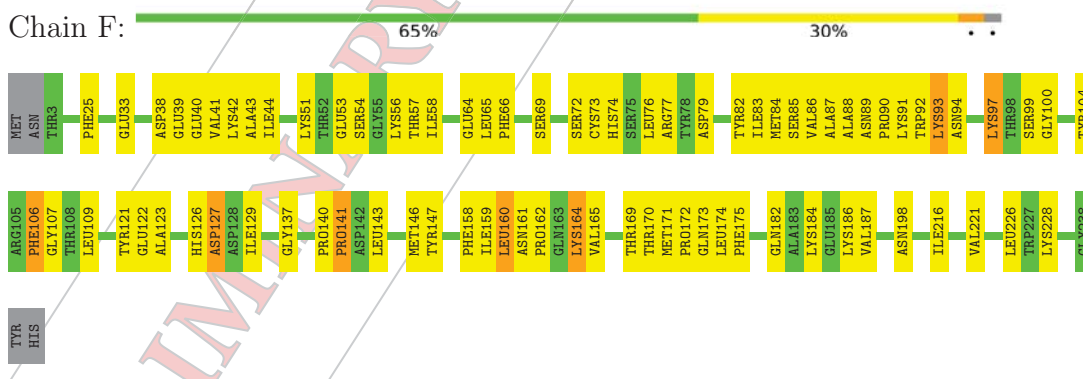

## 4 Experimental information

| Property                             | Value               | Source    |
|--------------------------------------|---------------------|-----------|
| Reconstruction method                | Not provided        | Depositor |
| Imposed symmetry                     | POINT, Not provided | Depositor |
| Number of images used                | Not provided        | Depositor |
| Resolution determination method      | Not provided        | Depositor |
| CTF correction method                | Not provided        | Depositor |
| Microscope                           | Not provided        | Depositor |
| Voltage (kV)                         | Not provided        | Depositor |
| Electron dose ( $e^-/\text{\AA}^2$ ) | Not provided        | Depositor |
| Minimum defocus (nm)                 | Not provided        | Depositor |
| Maximum defocus (nm)                 | Not provided        | Depositor |
| Magnification                        | Not provided        | Depositor |
| Image detector                       | Not provided        | Depositor |

PRELIMINARY VALIDATION REPORT

## 5 Model quality

### 5.1 Standard geometry

Bond lengths and bond angles in the following residue types are not validated in this section: AMY, PGV, NQA, FES, HEC, HEM

The Z score for a bond length (or angle) is the number of standard deviations the observed value is removed from the expected value. A bond length (or angle) with  $|Z| > 5$  is considered an outlier worth inspection. RMSZ is the root-mean-square of all Z scores of the bond lengths (or angles).

| Mol | Chain | Bond lengths |         | Bond angles |         |
|-----|-------|--------------|---------|-------------|---------|
|     |       | RMSZ         | # Z  >2 | RMSZ        | # Z  >2 |
| 1   | A     | 0.34         | 0/1039  | 0.52        | 0/1410  |
| 1   | D     | 0.34         | 0/1039  | 0.52        | 0/1410  |
| 2   | B     | 0.51         | 0/3346  | 0.51        | 0/4570  |
| 2   | E     | 0.51         | 0/3346  | 0.51        | 0/4570  |
| 3   | C     | 0.44         | 0/1974  | 0.53        | 0/2674  |
| 3   | F     | 0.44         | 0/1974  | 0.53        | 0/2674  |
| All | All   | 0.46         | 0/12718 | 0.52        | 0/17308 |

Chiral center outliers are detected by calculating the chiral volume of a chiral center and verifying if the center is modelled as a planar moiety or with the opposite hand. A planarity outlier is detected by checking planarity of atoms in a peptide group, atoms in a mainchain group or atoms of a sidechain that are expected to be planar.

| Mol | Chain | #Chirality outliers | #Planarity outliers |
|-----|-------|---------------------|---------------------|
| 1   | A     | 0                   | 1                   |
| 1   | D     | 0                   | 1                   |
| 2   | B     | 0                   | 1                   |
| 2   | E     | 0                   | 1                   |
| All | All   | 0                   | 4                   |

There are no bond length outliers.

There are no bond angle outliers.

There are no chirality outliers.

All (4) planarity outliers are listed below:

| Mol | Chain | Res | Type | Group   |
|-----|-------|-----|------|---------|
| 1   | A     | 151 | GLY  | Peptide |
| 2   | B     | 108 | THR  | Peptide |
| 1   | D     | 151 | GLY  | Peptide |

*Continued on next page...*

Continued from previous page...

| Mol | Chain | Res | Type | Group   |
|-----|-------|-----|------|---------|
| 2   | E     | 108 | THR  | Peptide |

## 5.2 Too-close contacts [i](#)

In the following table, the Non-H and H(model) columns list the number of non-hydrogen atoms and hydrogen atoms in the chain respectively. The H(added) column lists the number of hydrogen atoms added and optimized by MolProbity. The Clashes column lists the number of clashes within the asymmetric unit, whereas Symm-Clashes lists symmetry related clashes.

| Mol | Chain | Non-H | H(model) | H(added) | Clashes | Symm-Clashes |
|-----|-------|-------|----------|----------|---------|--------------|
| 1   | A     | 1012  | 0        | 1057     | 44      | 0            |
| 1   | D     | 1012  | 0        | 1057     | 51      | 0            |
| 2   | B     | 3226  | 0        | 3280     | 67      | 0            |
| 2   | E     | 3226  | 0        | 3280     | 73      | 0            |
| 3   | C     | 1917  | 0        | 1929     | 70      | 0            |
| 3   | F     | 1917  | 0        | 1929     | 72      | 0            |
| 4   | A     | 4     | 0        | 0        | 1       | 0            |
| 4   | D     | 4     | 0        | 0        | 0       | 0            |
| 5   | B     | 86    | 0        | 60       | 8       | 0            |
| 5   | E     | 86    | 0        | 60       | 8       | 0            |
| 6   | B     | 38    | 0        | 37       | 25      | 0            |
| 6   | E     | 38    | 0        | 37       | 20      | 0            |
| 7   | B     | 94    | 0        | 0        | 6       | 0            |
| 7   | E     | 94    | 0        | 0        | 11      | 0            |
| 8   | B     | 102   | 0        | 152      | 6       | 0            |
| 8   | E     | 51    | 0        | 76       | 4       | 0            |
| 9   | C     | 43    | 0        | 29       | 6       | 0            |
| 9   | F     | 43    | 0        | 29       | 8       | 0            |
| All | All   | 12993 | 0        | 13012    | 395     | 0            |

The all-atom clashscore is defined as the number of clashes found per 1000 atoms (including hydrogen atoms). The all-atom clashscore for this structure is 15.

All (395) close contacts within the same asymmetric unit are listed below, sorted by their clash magnitude.

| Atom-1          | Atom-2          | Interatomic distance (Å) | Clash overlap (Å) |
|-----------------|-----------------|--------------------------|-------------------|
| 3:C:161:ASN:ND2 | 3:C:164:LYS:HB2 | 1.43                     | 1.31              |
| 2:E:42:ILE:HD11 | 6:E:503:AMY:O1  | 1.27                     | 1.30              |
| 2:B:42:ILE:HD11 | 6:B:503:AMY:O1  | 1.23                     | 1.27              |
| 3:F:161:ASN:ND2 | 3:F:164:LYS:HB2 | 1.54                     | 1.22              |

Continued on next page...

Continued from previous page...

| Atom-1           | Atom-2           | Interatomic distance (Å) | Clash overlap (Å) |
|------------------|------------------|--------------------------|-------------------|
| 6:B:503:AMY:H162 | 6:B:503:AMY:H253 | 1.28                     | 1.09              |
| 6:E:503:AMY:H13  | 6:E:503:AMY:H192 | 1.09                     | 1.08              |
| 6:B:503:AMY:H13  | 6:B:503:AMY:H192 | 1.10                     | 1.05              |
| 3:F:161:ASN:ND2  | 3:F:164:LYS:HD3  | 1.72                     | 1.05              |
| 3:C:161:ASN:ND2  | 3:C:164:LYS:HD3  | 1.73                     | 1.03              |
| 2:E:222:ARG:HH12 | 6:E:503:AMY:H193 | 1.23                     | 1.01              |
| 3:F:161:ASN:HD21 | 3:F:164:LYS:HD3  | 1.26                     | 0.96              |
| 6:B:503:AMY:H152 | 7:B:504:NQA:C46  | 1.96                     | 0.95              |
| 6:E:503:AMY:H192 | 6:E:503:AMY:C13  | 1.95                     | 0.94              |
| 6:E:503:AMY:C19  | 6:E:503:AMY:H13  | 1.97                     | 0.94              |
| 3:C:161:ASN:HD21 | 3:C:164:LYS:HD3  | 1.31                     | 0.93              |
| 6:B:503:AMY:H13  | 6:B:503:AMY:C19  | 2.01                     | 0.91              |
| 6:B:503:AMY:C25  | 6:B:503:AMY:H162 | 2.01                     | 0.90              |
| 5:E:501:HEM:HBB2 | 5:E:501:HEM:HHC  | 1.55                     | 0.87              |
| 2:B:42:ILE:CD1   | 6:B:503:AMY:O1   | 2.18                     | 0.87              |
| 5:B:501:HEM:HHC  | 5:B:501:HEM:HBB2 | 1.55                     | 0.87              |
| 3:C:161:ASN:ND2  | 3:C:164:LYS:CB   | 2.34                     | 0.86              |
| 6:B:503:AMY:C13  | 6:B:503:AMY:H192 | 2.02                     | 0.86              |
| 3:F:159:ILE:HD13 | 9:F:501:HEC:HMB2 | 1.54                     | 0.86              |
| 5:E:501:HEM:HHD  | 5:E:501:HEM:HBC2 | 1.60                     | 0.83              |
| 3:C:161:ASN:HD21 | 3:C:164:LYS:HB2  | 1.44                     | 0.83              |
| 5:B:501:HEM:HBC2 | 5:B:501:HEM:HHD  | 1.60                     | 0.82              |
| 3:C:159:ILE:HD13 | 9:C:501:HEC:HMB2 | 1.64                     | 0.80              |
| 3:F:159:ILE:CD1  | 9:F:501:HEC:HMB2 | 2.12                     | 0.80              |
| 2:E:42:ILE:CD1   | 6:E:503:AMY:O1   | 2.21                     | 0.80              |
| 2:B:37:PRO:HG3   | 8:B:506:PGV:H012 | 1.66                     | 0.78              |
| 2:B:20:ILE:HD13  | 8:B:507:PGV:H222 | 1.67                     | 0.77              |
| 2:E:37:PRO:HG3   | 8:E:506:PGV:H012 | 1.66                     | 0.76              |
| 2:B:113:ASN:ND2  | 2:B:339:LYS:O    | 2.16                     | 0.76              |
| 1:A:24:ALA:HB1   | 7:B:505:NQA:C30  | 2.15                     | 0.75              |
| 2:E:34:LEU:CD1   | 6:E:503:AMY:H3   | 2.17                     | 0.75              |
| 3:F:161:ASN:ND2  | 3:F:164:LYS:CB   | 2.44                     | 0.74              |
| 1:A:111:CYS:HG   | 1:A:142:TYR:HH   | 1.27                     | 0.74              |
| 1:A:134:HIS:HB3  | 1:A:141:LEU:HD23 | 1.70                     | 0.74              |
| 2:E:113:ASN:ND2  | 2:E:339:LYS:O    | 2.16                     | 0.74              |
| 3:C:159:ILE:CD1  | 9:C:501:HEC:HMB2 | 2.17                     | 0.73              |
| 2:E:34:LEU:HD13  | 6:E:503:AMY:H3   | 1.70                     | 0.73              |
| 1:D:111:CYS:HG   | 1:D:142:TYR:HH   | 1.32                     | 0.73              |
| 1:D:134:HIS:HB3  | 1:D:141:LEU:HD23 | 1.70                     | 0.73              |
| 1:A:147:ASP:HA   | 1:A:156:PRO:HB3  | 1.72                     | 0.72              |
| 2:B:34:LEU:HD13  | 6:B:503:AMY:H3   | 1.72                     | 0.72              |

Continued on next page...

Continued from previous page...

| Atom-1           | Atom-2           | Interatomic distance (Å) | Clash overlap (Å) |
|------------------|------------------|--------------------------|-------------------|
| 6:B:503:AMY:C21  | 6:B:503:AMY:H273 | 2.19                     | 0.71              |
| 2:B:34:LEU:CD1   | 6:B:503:AMY:H3   | 2.20                     | 0.71              |
| 2:B:222:ARG:HH12 | 6:B:503:AMY:H193 | 1.55                     | 0.71              |
| 1:D:147:ASP:HA   | 1:D:156:PRO:HB3  | 1.72                     | 0.71              |
| 3:C:169:THR:HG22 | 3:C:171:MET:H    | 1.56                     | 0.71              |
| 3:F:169:THR:HG22 | 3:F:171:MET:H    | 1.56                     | 0.71              |
| 3:F:161:ASN:HD21 | 3:F:164:LYS:HB2  | 1.52                     | 0.69              |
| 2:E:222:ARG:NH1  | 6:E:503:AMY:H193 | 2.04                     | 0.68              |
| 1:D:28:LEU:HD11  | 7:E:505:NQA:C29  | 2.24                     | 0.68              |
| 3:C:73:CYS:HB3   | 3:C:140:PRO:HG2  | 1.77                     | 0.67              |
| 3:F:73:CYS:HB3   | 3:F:140:PRO:HG2  | 1.77                     | 0.66              |
| 6:B:503:AMY:O8   | 6:B:503:AMY:H253 | 1.96                     | 0.66              |
| 2:E:24:GLN:OE1   | 2:E:222:ARG:NH2  | 2.31                     | 0.64              |
| 3:C:160:LEU:HB3  | 3:C:187:VAL:HG21 | 1.79                     | 0.64              |
| 1:D:8:PHE:HE2    | 1:D:10:SER:HG    | 1.46                     | 0.64              |
| 1:A:100:LYS:HG3  | 1:A:101:GLY:H    | 1.64                     | 0.63              |
| 3:C:41:VAL:HG23  | 3:C:42:LYS:H     | 1.63                     | 0.63              |
| 3:F:41:VAL:HG23  | 3:F:42:LYS:H     | 1.63                     | 0.63              |
| 2:B:24:GLN:OE1   | 2:B:222:ARG:NH2  | 2.31                     | 0.63              |
| 1:D:100:LYS:HG3  | 1:D:101:GLY:H    | 1.64                     | 0.63              |
| 2:E:30:VAL:CG2   | 6:E:503:AMY:H4   | 2.28                     | 0.63              |
| 2:E:248:PRO:HA   | 2:E:251:THR:HG22 | 1.81                     | 0.62              |
| 3:F:160:LEU:HB3  | 3:F:187:VAL:HG21 | 1.80                     | 0.62              |
| 3:F:38:ASP:OD2   | 3:F:184:LYS:NZ   | 2.33                     | 0.62              |
| 3:F:44:ILE:HG23  | 3:F:58:ILE:HD13  | 1.81                     | 0.62              |
| 2:B:248:PRO:HA   | 2:B:251:THR:HG22 | 1.82                     | 0.61              |
| 2:B:30:VAL:CG2   | 6:B:503:AMY:H4   | 2.30                     | 0.61              |
| 3:C:44:ILE:HG23  | 3:C:58:ILE:HD13  | 1.81                     | 0.61              |
| 3:C:65:LEU:HD11  | 3:C:186:LYS:HD2  | 1.83                     | 0.61              |
| 6:E:503:AMY:H261 | 6:E:503:AMY:O3   | 2.00                     | 0.61              |
| 2:E:226:ILE:HD13 | 6:E:503:AMY:C4   | 2.30                     | 0.61              |
| 2:B:226:ILE:HD13 | 6:B:503:AMY:C4   | 2.31                     | 0.61              |
| 3:C:38:ASP:OD2   | 3:C:184:LYS:NZ   | 2.33                     | 0.61              |
| 1:A:8:PHE:HE2    | 1:A:10:SER:HG    | 1.49                     | 0.61              |
| 3:C:161:ASN:HD22 | 3:C:164:LYS:HB2  | 1.60                     | 0.61              |
| 3:C:147:TYR:HB3  | 3:C:198:ASN:HD22 | 1.66                     | 0.60              |
| 6:E:503:AMY:C21  | 6:E:503:AMY:H273 | 2.31                     | 0.60              |
| 3:F:56:LYS:NZ    | 3:F:64:GLU:OE1   | 2.34                     | 0.60              |
| 1:A:113:HIS:HB3  | 1:A:153:PRO:HA   | 1.83                     | 0.60              |
| 1:D:111:CYS:HB3  | 1:D:116:CYS:H    | 1.67                     | 0.60              |
| 6:B:503:AMY:H261 | 6:B:503:AMY:O3   | 2.02                     | 0.59              |

Continued on next page...

Continued from previous page...

| Atom-1           | Atom-2           | Interatomic distance (Å) | Clash overlap (Å) |
|------------------|------------------|--------------------------|-------------------|
| 3:C:56:LYS:NZ    | 3:C:64:GLU:OE1   | 2.34                     | 0.59              |
| 1:D:113:HIS:HB3  | 1:D:153:PRO:HA   | 1.83                     | 0.59              |
| 2:E:307:PHE:O    | 2:E:308:ARG:HG3  | 2.02                     | 0.59              |
| 3:F:147:TYR:HB3  | 3:F:198:ASN:HD22 | 1.66                     | 0.59              |
| 3:F:65:LEU:HD11  | 3:F:186:LYS:HD2  | 1.83                     | 0.59              |
| 6:E:503:AMY:O9   | 6:E:503:AMY:H273 | 2.03                     | 0.59              |
| 3:F:161:ASN:ND2  | 3:F:164:LYS:CD   | 2.59                     | 0.59              |
| 1:A:111:CYS:HB3  | 1:A:116:CYS:H    | 1.67                     | 0.59              |
| 9:C:501:HEC:HBA2 | 9:C:501:HEC:HHA  | 1.84                     | 0.58              |
| 2:E:247:HIS:CD2  | 2:E:251:THR:HG21 | 2.38                     | 0.58              |
| 3:C:161:ASN:ND2  | 3:C:164:LYS:CD   | 2.58                     | 0.58              |
| 2:B:247:HIS:CD2  | 2:B:251:THR:HG21 | 2.38                     | 0.58              |
| 2:E:226:ILE:HD12 | 5:E:502:HEM:HBA2 | 1.85                     | 0.58              |
| 9:F:501:HEC:HBA2 | 9:F:501:HEC:HHA  | 1.84                     | 0.58              |
| 2:B:226:ILE:HD12 | 5:B:502:HEM:HBA2 | 1.85                     | 0.58              |
| 2:B:307:PHE:O    | 2:B:308:ARG:HG3  | 2.02                     | 0.57              |
| 3:C:123:ALA:HA   | 3:C:127:ASP:HB2  | 1.86                     | 0.57              |
| 3:F:123:ALA:HA   | 3:F:127:ASP:HB2  | 1.86                     | 0.57              |
| 3:C:138:GLN:HB2  | 1:D:137:CYS:SG   | 2.44                     | 0.56              |
| 3:C:172:PRO:HD3  | 9:C:501:HEC:HBC2 | 1.87                     | 0.56              |
| 5:E:502:HEM:HMC2 | 5:E:502:HEM:HBC2 | 1.87                     | 0.56              |
| 2:B:151:TRP:HB3  | 2:B:294:ILE:HG12 | 1.88                     | 0.56              |
| 1:A:60:THR:HG22  | 1:A:61:SER:H     | 1.71                     | 0.56              |
| 3:F:172:PRO:HD3  | 9:F:501:HEC:HBC2 | 1.87                     | 0.56              |
| 2:E:151:TRP:HB3  | 2:E:294:ILE:HG12 | 1.88                     | 0.55              |
| 3:F:161:ASN:HD21 | 3:F:164:LYS:CD   | 2.11                     | 0.55              |
| 3:C:137:GLY:HA3  | 1:D:136:PRO:HG2  | 1.88                     | 0.55              |
| 6:E:503:AMY:H162 | 6:E:503:AMY:O8   | 2.07                     | 0.55              |
| 5:B:502:HEM:HBA1 | 5:B:502:HEM:HHA  | 1.88                     | 0.55              |
| 5:B:502:HEM:HBC2 | 5:B:502:HEM:HMC2 | 1.87                     | 0.55              |
| 1:D:60:THR:HG22  | 1:D:61:SER:H     | 1.71                     | 0.55              |
| 1:D:106:ALA:O    | 1:D:162:GLN:NE2  | 2.40                     | 0.54              |
| 5:E:502:HEM:HBA1 | 5:E:502:HEM:HHA  | 1.88                     | 0.54              |
| 1:D:27:ALA:HB2   | 7:E:505:NQA:C46  | 2.37                     | 0.54              |
| 2:E:65:SER:HB2   | 2:E:68:ASP:HB2   | 1.89                     | 0.54              |
| 7:E:504:NQA:C46  | 7:E:504:NQA:C22  | 2.86                     | 0.54              |
| 1:A:65:LYS:HB3   | 1:A:66:THR:HG22  | 1.89                     | 0.54              |
| 3:C:99:SER:N     | 3:C:100:GLY:HA3  | 2.22                     | 0.54              |
| 2:E:9:ASP:O      | 2:E:13:GLU:HG3   | 2.08                     | 0.54              |
| 1:A:49:VAL:HG21  | 1:A:169:LEU:HD23 | 1.90                     | 0.54              |
| 1:A:39:ALA:HB1   | 2:E:187:GLY:HA3  | 1.90                     | 0.54              |

Continued on next page...



Continued from previous page...

| Atom-1           | Atom-2           | Interatomic distance (Å) | Clash overlap (Å) |
|------------------|------------------|--------------------------|-------------------|
| 3:C:161:ASN:HD21 | 3:C:164:LYS:CD   | 2.12                     | 0.54              |
| 2:B:197:ARG:NH1  | 1:D:32:MET:O     | 2.41                     | 0.54              |
| 2:B:9:ASP:O      | 2:B:13:GLU:HG3   | 2.08                     | 0.54              |
| 3:F:91:LYS:HA    | 3:F:92:TRP:C     | 2.27                     | 0.54              |
| 2:B:65:SER:HB2   | 2:B:68:ASP:HB2   | 1.89                     | 0.53              |
| 3:F:99:SER:N     | 3:F:100:GLY:HA3  | 2.22                     | 0.53              |
| 1:A:106:ALA:O    | 1:A:162:GLN:NE2  | 2.41                     | 0.53              |
| 2:E:30:VAL:HG21  | 6:E:503:AMY:C4   | 2.37                     | 0.53              |
| 3:C:74:HIS:HE1   | 3:C:141:PRO:HD2  | 1.74                     | 0.53              |
| 3:C:91:LYS:HA    | 3:C:92:TRP:C     | 2.27                     | 0.53              |
| 1:D:49:VAL:HG21  | 1:D:169:LEU:HD23 | 1.90                     | 0.53              |
| 1:A:62:TRP:HB2   | 1:A:67:LEU:HD22  | 1.91                     | 0.53              |
| 3:C:39:GLU:HA    | 3:C:42:LYS:HB2   | 1.91                     | 0.53              |
| 1:D:65:LYS:HB3   | 1:D:66:THR:HG22  | 1.89                     | 0.53              |
| 1:A:31:VAL:HG11  | 2:B:57:VAL:HG13  | 1.91                     | 0.52              |
| 3:F:74:HIS:HE1   | 3:F:141:PRO:HD2  | 1.74                     | 0.52              |
| 1:D:31:VAL:HG22  | 2:E:83:PHE:HB2   | 1.91                     | 0.52              |
| 2:B:217:HIS:NE2  | 5:B:502:HEM:ND   | 2.57                     | 0.52              |
| 2:B:235:ASP:OD2  | 2:B:239:ASN:ND2  | 2.43                     | 0.52              |
| 7:B:504:NQA:C36  | 2:E:209:ILE:HG22 | 2.40                     | 0.52              |
| 3:C:86:VAL:HG11  | 3:C:92:TRP:CD1   | 2.45                     | 0.52              |
| 2:B:30:VAL:HG21  | 6:B:503:AMY:C4   | 2.39                     | 0.52              |
| 2:E:335:PHE:O    | 2:E:395:SER:HB3  | 2.09                     | 0.52              |
| 5:B:502:HEM:HBB2 | 5:B:502:HEM:HMB1 | 1.91                     | 0.52              |
| 2:B:335:PHE:O    | 2:B:395:SER:HB3  | 2.09                     | 0.52              |
| 2:E:217:HIS:NE2  | 5:E:502:HEM:ND   | 2.58                     | 0.51              |
| 6:B:503:AMY:H162 | 6:B:503:AMY:O8   | 2.10                     | 0.51              |
| 1:D:62:TRP:HB2   | 1:D:67:LEU:HD22  | 1.91                     | 0.51              |
| 2:E:30:VAL:HG21  | 6:E:503:AMY:H4   | 1.91                     | 0.51              |
| 2:B:30:VAL:HG21  | 6:B:503:AMY:H4   | 1.92                     | 0.51              |
| 3:C:127:ASP:OD1  | 3:F:97:LYS:NZ    | 2.43                     | 0.51              |
| 3:F:39:GLU:HA    | 3:F:42:LYS:HB2   | 1.91                     | 0.51              |
| 3:F:86:VAL:HG11  | 3:F:92:TRP:CD1   | 2.45                     | 0.51              |
| 5:E:502:HEM:HMB1 | 5:E:502:HEM:HBB2 | 1.91                     | 0.51              |
| 1:D:111:CYS:SG   | 1:D:142:TYR:OH   | 2.48                     | 0.51              |
| 1:D:132:VAL:HG12 | 1:D:143:THR:HA   | 1.93                     | 0.51              |
| 3:F:72:SER:HA    | 3:F:84:MET:HG2   | 1.93                     | 0.51              |
| 3:C:72:SER:HA    | 3:C:84:MET:HG2   | 1.93                     | 0.50              |
| 2:E:235:ASP:OD2  | 2:E:239:ASN:ND2  | 2.43                     | 0.50              |
| 1:A:27:ALA:O     | 1:A:31:VAL:HG23  | 2.12                     | 0.50              |
| 1:D:27:ALA:O     | 1:D:31:VAL:HG23  | 2.12                     | 0.50              |

Continued on next page...

Continued from previous page...

| Atom-1           | Atom-2           | Interatomic distance (Å) | Clash overlap (Å) |
|------------------|------------------|--------------------------|-------------------|
| 3:F:160:LEU:HD12 | 3:F:160:LEU:C    | 2.31                     | 0.50              |
| 1:A:132:VAL:HG12 | 1:A:143:THR:HA   | 1.93                     | 0.50              |
| 3:F:171:MET:HG3  | 9:F:501:HEC:NC   | 2.27                     | 0.50              |
| 3:F:93:LYS:HD3   | 3:F:93:LYS:N     | 2.27                     | 0.50              |
| 3:C:97:LYS:NZ    | 3:F:127:ASP:OD1  | 2.44                     | 0.49              |
| 3:C:93:LYS:HD3   | 3:C:93:LYS:N     | 2.27                     | 0.49              |
| 1:D:28:LEU:CD1   | 7:E:505:NQA:C29  | 2.90                     | 0.49              |
| 2:B:209:ILE:HG22 | 7:E:504:NQA:C36  | 2.42                     | 0.49              |
| 3:F:91:LYS:HB3   | 3:F:94:ASN:N     | 2.27                     | 0.49              |
| 3:C:91:LYS:HB3   | 3:C:94:ASN:N     | 2.28                     | 0.49              |
| 3:C:69:SER:OG    | 3:C:69:SER:O     | 2.30                     | 0.49              |
| 3:C:171:MET:HG3  | 9:C:501:HEC:NC   | 2.27                     | 0.49              |
| 2:B:267:PHE:HA   | 3:C:216:ILE:HD11 | 1.95                     | 0.49              |
| 3:C:160:LEU:C    | 3:C:160:LEU:HD12 | 2.32                     | 0.48              |
| 3:C:53:GLU:O     | 3:C:54:SER:OG    | 2.30                     | 0.48              |
| 1:D:143:THR:HG23 | 1:D:147:ASP:O    | 2.13                     | 0.48              |
| 1:A:143:THR:HG23 | 1:A:147:ASP:O    | 2.13                     | 0.48              |
| 3:F:161:ASN:N    | 3:F:162:PRO:HD3  | 2.29                     | 0.48              |
| 1:D:55:MET:O     | 1:D:120:TRP:NE1  | 2.45                     | 0.48              |
| 2:E:222:ARG:HH12 | 6:E:503:AMY:C19  | 2.09                     | 0.48              |
| 3:F:109:LEU:HD23 | 3:F:109:LEU:H    | 1.79                     | 0.48              |
| 3:C:182:GLN:O    | 3:C:186:LYS:HG2  | 2.14                     | 0.48              |
| 1:D:24:ALA:HB1   | 7:E:505:NQA:C30  | 2.44                     | 0.48              |
| 2:E:179:THR:HG23 | 2:E:183:TRP:HB2  | 1.95                     | 0.47              |
| 1:A:136:PRO:HG2  | 3:F:137:GLY:HA3  | 1.96                     | 0.47              |
| 2:B:179:THR:HG23 | 2:B:183:TRP:HB2  | 1.95                     | 0.47              |
| 1:A:31:VAL:HG11  | 2:B:57:VAL:CG1   | 2.45                     | 0.47              |
| 2:B:113:ASN:ND2  | 2:B:344:ARG:HH11 | 2.12                     | 0.47              |
| 2:B:120:GLU:O    | 2:B:124:ILE:HG12 | 2.15                     | 0.47              |
| 2:B:181:VAL:HA   | 2:B:187:GLY:HA2  | 1.96                     | 0.47              |
| 3:C:86:VAL:O     | 3:C:89:ASN:N     | 2.48                     | 0.47              |
| 3:F:87:ALA:HA    | 3:F:88:ALA:HA    | 1.65                     | 0.47              |
| 2:E:138:LEU:HD11 | 2:E:156:THR:HG21 | 1.97                     | 0.47              |
| 3:C:77:ARG:C     | 3:C:79:ASP:H     | 2.17                     | 0.47              |
| 2:E:113:ASN:ND2  | 2:E:344:ARG:HH11 | 2.12                     | 0.47              |
| 2:E:181:VAL:HA   | 2:E:187:GLY:HA2  | 1.97                     | 0.47              |
| 1:D:49:VAL:O     | 1:D:71:ARG:NH1   | 2.45                     | 0.47              |
| 3:C:109:LEU:H    | 3:C:109:LEU:HD23 | 1.79                     | 0.47              |
| 2:E:139:SER:OG   | 2:E:202:HIS:HB2  | 2.15                     | 0.47              |
| 3:F:182:GLN:O    | 3:F:186:LYS:HG2  | 2.14                     | 0.47              |
| 2:B:138:LEU:HD11 | 2:B:156:THR:HG21 | 1.97                     | 0.46              |

Continued on next page...

Continued from previous page...

| Atom-1           | Atom-2           | Interatomic distance (Å) | Clash overlap (Å) |
|------------------|------------------|--------------------------|-------------------|
| 3:F:86:VAL:O     | 3:F:89:ASN:N     | 2.48                     | 0.46              |
| 2:B:236:LYS:HD2  | 2:B:236:LYS:HA   | 1.67                     | 0.46              |
| 1:A:45:THR:O     | 1:A:47:ILE:HG13  | 2.16                     | 0.46              |
| 2:B:139:SER:OG   | 2:B:202:HIS:HB2  | 2.15                     | 0.46              |
| 2:E:120:GLU:O    | 2:E:124:ILE:HG12 | 2.15                     | 0.46              |
| 3:F:69:SER:OG    | 3:F:69:SER:O     | 2.30                     | 0.46              |
| 3:F:77:ARG:C     | 3:F:79:ASP:H     | 2.17                     | 0.46              |
| 2:E:267:PHE:HA   | 3:F:216:ILE:HD11 | 1.97                     | 0.46              |
| 3:F:106:PHE:HA   | 3:F:107:GLY:HA2  | 1.71                     | 0.46              |
| 3:F:121:TYR:O    | 3:F:122:GLU:HG2  | 2.15                     | 0.46              |
| 3:C:170:THR:HG21 | 1:D:136:PRO:O    | 2.16                     | 0.46              |
| 3:C:121:TYR:O    | 3:C:122:GLU:HG2  | 2.15                     | 0.46              |
| 1:A:73:PRO:C     | 1:A:74:LYS:HD3   | 2.37                     | 0.45              |
| 3:F:161:ASN:HD22 | 3:F:164:LYS:HD3  | 1.74                     | 0.45              |
| 3:C:161:ASN:N    | 3:C:162:PRO:HD3  | 2.32                     | 0.45              |
| 1:A:31:VAL:O     | 2:B:61:TYR:OH    | 2.34                     | 0.45              |
| 3:C:170:THR:HG23 | 1:D:137:CYS:O    | 2.16                     | 0.45              |
| 1:D:16:LEU:HD21  | 3:F:221:VAL:HG13 | 1.98                     | 0.45              |
| 3:C:69:SER:OG    | 3:C:174:LEU:HD21 | 2.17                     | 0.45              |
| 3:F:69:SER:OG    | 3:F:174:LEU:HD21 | 2.17                     | 0.45              |
| 2:B:47:THR:OG1   | 2:B:261:TYR:OH   | 2.16                     | 0.45              |
| 1:D:73:PRO:C     | 1:D:74:LYS:HD3   | 2.37                     | 0.45              |
| 3:F:160:LEU:C    | 3:F:160:LEU:CD1  | 2.85                     | 0.45              |
| 2:B:83:PHE:HZ    | 7:B:505:NQA:C16  | 2.30                     | 0.45              |
| 3:F:53:GLU:O     | 3:F:54:SER:OG    | 2.30                     | 0.45              |
| 1:D:45:THR:O     | 1:D:47:ILE:HG13  | 2.15                     | 0.45              |
| 2:B:71:ASP:O     | 2:B:75:TYR:HB3   | 2.17                     | 0.45              |
| 2:E:83:PHE:HZ    | 7:E:505:NQA:C16  | 2.30                     | 0.45              |
| 1:A:49:VAL:O     | 1:A:71:ARG:NH1   | 2.45                     | 0.45              |
| 1:D:13:ILE:H     | 1:D:13:ILE:HG12  | 1.49                     | 0.45              |
| 1:D:152:PRO:N    | 1:D:153:PRO:HD2  | 2.32                     | 0.45              |
| 1:A:32:MET:O     | 2:E:197:ARG:HD3  | 2.16                     | 0.44              |
| 2:E:71:ASP:O     | 2:E:75:TYR:HB3   | 2.17                     | 0.44              |
| 2:B:244:VAL:HG13 | 2:B:244:VAL:O    | 2.17                     | 0.44              |
| 2:B:48:PHE:CE1   | 5:B:501:HEM:HBB1 | 2.52                     | 0.44              |
| 1:A:28:LEU:HD11  | 7:B:505:NQA:C43  | 2.47                     | 0.44              |
| 2:E:193:VAL:CG1  | 2:E:197:ARG:HH21 | 2.30                     | 0.44              |
| 2:E:48:PHE:CE1   | 5:E:501:HEM:HBB1 | 2.52                     | 0.44              |
| 3:F:228:LYS:HA   | 3:F:228:LYS:HD3  | 1.68                     | 0.44              |
| 2:B:193:VAL:CG1  | 2:B:197:ARG:HH21 | 2.30                     | 0.44              |
| 2:B:104:LEU:HD23 | 8:B:506:PGV:H221 | 1.99                     | 0.44              |

Continued on next page...

Continued from previous page...

| Atom-1           | Atom-2           | Interatomic distance (Å) | Clash overlap (Å) |
|------------------|------------------|--------------------------|-------------------|
| 3:C:160:LEU:C    | 3:C:160:LEU:CD1  | 2.85                     | 0.44              |
| 3:C:126:HIS:CE1  | 3:C:129:ILE:HG23 | 2.52                     | 0.44              |
| 2:E:130:TYR:CZ   | 2:E:134:ILE:HD11 | 2.53                     | 0.44              |
| 1:D:26:TYR:HD2   | 7:E:505:NQA:C46  | 2.30                     | 0.44              |
| 3:F:126:HIS:CE1  | 3:F:129:ILE:HG23 | 2.52                     | 0.44              |
| 2:B:113:ASN:HB2  | 2:B:339:LYS:O    | 2.18                     | 0.44              |
| 2:B:146:GLY:O    | 2:B:285:ALA:HB2  | 2.18                     | 0.44              |
| 2:E:154:ILE:HD12 | 2:E:185:LYS:HE3  | 2.00                     | 0.44              |
| 1:A:65:LYS:HA    | 1:A:66:THR:HA    | 1.59                     | 0.44              |
| 1:D:41:LEU:HA    | 1:D:42:GLY:HA2   | 1.65                     | 0.44              |
| 1:A:137:CYS:O    | 3:F:170:THR:HG23 | 2.18                     | 0.44              |
| 1:A:152:PRO:N    | 1:A:153:PRO:HD2  | 2.32                     | 0.44              |
| 1:A:138:HIS:ND1  | 4:A:501:FES:S2   | 2.84                     | 0.44              |
| 3:F:171:MET:HG3  | 9:F:501:HEC:C4C  | 2.48                     | 0.44              |
| 3:C:171:MET:HG3  | 9:C:501:HEC:C4C  | 2.48                     | 0.44              |
| 3:F:51:LYS:HD2   | 3:F:57:THR:HG22  | 1.99                     | 0.44              |
| 2:B:115:TYR:HB2  | 2:B:331:PRO:HB3  | 2.00                     | 0.43              |
| 2:E:113:ASN:HB2  | 2:E:339:LYS:O    | 2.18                     | 0.43              |
| 3:F:91:LYS:HB2   | 3:F:91:LYS:HE2   | 1.82                     | 0.43              |
| 2:B:130:TYR:CZ   | 2:B:134:ILE:HD11 | 2.53                     | 0.43              |
| 2:E:252:LEU:HD22 | 3:F:226:LEU:HD22 | 2.00                     | 0.43              |
| 2:E:146:GLY:O    | 2:E:285:ALA:HB2  | 2.18                     | 0.43              |
| 2:E:138:LEU:HD12 | 2:E:300:LEU:HD11 | 2.00                     | 0.43              |
| 1:D:26:TYR:HE2   | 7:E:505:NQA:C16  | 2.32                     | 0.43              |
| 2:B:138:LEU:HD12 | 2:B:300:LEU:HD11 | 2.01                     | 0.43              |
| 2:E:115:TYR:HB2  | 2:E:331:PRO:HB3  | 2.00                     | 0.43              |
| 3:F:158:PHE:HA   | 3:F:165:VAL:HG21 | 2.00                     | 0.43              |
| 2:B:98:PHE:CE2   | 2:B:133:LEU:HD11 | 2.54                     | 0.43              |
| 3:C:168:GLY:O    | 1:D:138:HIS:HB3  | 2.17                     | 0.43              |
| 2:E:104:LEU:HD23 | 8:E:506:PGV:H221 | 1.99                     | 0.43              |
| 2:E:98:PHE:CE2   | 2:E:133:LEU:HD11 | 2.54                     | 0.43              |
| 3:F:161:ASN:CG   | 3:F:164:LYS:HB2  | 2.31                     | 0.43              |
| 1:A:54:PRO:HB3   | 1:A:73:PRO:HD3   | 2.01                     | 0.43              |
| 2:E:153:PHE:HZ   | 2:E:184:MET:HB2  | 1.84                     | 0.43              |
| 1:A:9:ILE:O      | 1:A:13:ILE:HG12  | 2.18                     | 0.43              |
| 2:B:153:PHE:HZ   | 2:B:184:MET:HB2  | 1.84                     | 0.43              |
| 2:B:154:ILE:HD12 | 2:B:185:LYS:HE3  | 2.00                     | 0.43              |
| 2:B:30:VAL:HG13  | 2:B:31:ALA:O     | 2.19                     | 0.43              |
| 2:E:244:VAL:HG13 | 2:E:244:VAL:O    | 2.17                     | 0.43              |
| 1:D:24:ALA:HB1   | 7:E:505:NQA:C28  | 2.48                     | 0.43              |
| 2:B:107:PHE:HE2  | 8:B:506:PGV:H311 | 1.84                     | 0.43              |

Continued on next page...

Continued from previous page...

| Atom-1           | Atom-2           | Interatomic distance (Å) | Clash overlap (Å) |
|------------------|------------------|--------------------------|-------------------|
| 1:D:68:PHE:CE2   | 1:D:109:GLY:HA3  | 2.53                     | 0.43              |
| 1:D:9:ILE:O      | 1:D:13:ILE:HG12  | 2.18                     | 0.43              |
| 3:F:92:TRP:HA    | 3:F:93:LYS:HA    | 1.84                     | 0.43              |
| 3:C:158:PHE:HA   | 3:C:165:VAL:HG21 | 2.00                     | 0.43              |
| 3:C:228:LYS:HA   | 3:C:228:LYS:HD3  | 1.67                     | 0.43              |
| 3:C:83:ILE:O     | 3:C:89:ASN:HB2   | 2.19                     | 0.43              |
| 7:E:505:NQA:C47  | 7:E:505:NQA:C18  | 2.96                     | 0.43              |
| 3:F:41:VAL:C     | 3:F:43:ALA:H     | 2.22                     | 0.43              |
| 1:A:13:ILE:H     | 1:A:13:ILE:HG12  | 1.49                     | 0.42              |
| 7:B:505:NQA:C47  | 7:B:505:NQA:C18  | 2.96                     | 0.42              |
| 3:C:51:LYS:HD2   | 3:C:57:THR:HG22  | 1.99                     | 0.42              |
| 1:D:51:LYS:HZ1   | 1:D:58:ARG:HH11  | 1.66                     | 0.42              |
| 2:E:30:VAL:HG13  | 2:E:31:ALA:O     | 2.19                     | 0.42              |
| 1:A:68:PHE:CE2   | 1:A:109:GLY:HA3  | 2.53                     | 0.42              |
| 1:A:114:LEU:HD23 | 1:A:114:LEU:HA   | 1.89                     | 0.42              |
| 3:C:87:ALA:HA    | 3:C:88:ALA:HA    | 1.65                     | 0.42              |
| 2:E:356:ILE:HA   | 2:E:356:ILE:HD13 | 1.92                     | 0.42              |
| 6:E:503:AMY:N2   | 6:E:503:AMY:O1   | 2.51                     | 0.42              |
| 3:F:66:PHE:CE1   | 3:F:143:LEU:HD12 | 2.54                     | 0.42              |
| 3:F:85:SER:HA    | 3:F:86:VAL:HA    | 1.90                     | 0.42              |
| 1:A:121:LYS:H    | 1:A:133:PHE:HB3  | 1.84                     | 0.42              |
| 3:C:41:VAL:C     | 3:C:43:ALA:H     | 2.22                     | 0.42              |
| 1:D:121:LYS:H    | 1:D:133:PHE:HB3  | 1.84                     | 0.42              |
| 6:B:503:AMY:O1   | 6:B:503:AMY:N2   | 2.52                     | 0.42              |
| 2:B:74:THR:O     | 2:B:78:MET:HB2   | 2.20                     | 0.42              |
| 2:B:201:SER:OG   | 2:B:202:HIS:N    | 2.52                     | 0.42              |
| 2:B:206:TYR:HB2  | 2:B:207:PRO:HD3  | 2.02                     | 0.42              |
| 6:B:503:AMY:C25  | 6:B:503:AMY:H273 | 2.49                     | 0.42              |
| 2:E:201:SER:OG   | 2:E:202:HIS:N    | 2.52                     | 0.42              |
| 2:E:36:PHE:N     | 2:E:37:PRO:HD2   | 2.35                     | 0.42              |
| 2:B:282:PHE:O    | 3:C:145:SER:OG   | 2.36                     | 0.42              |
| 3:C:226:LEU:HD23 | 3:C:226:LEU:HA   | 1.86                     | 0.42              |
| 3:C:66:PHE:CE1   | 3:C:143:LEU:HD12 | 2.54                     | 0.42              |
| 2:E:62:TYR:OH    | 2:E:143:LEU:O    | 2.31                     | 0.42              |
| 2:E:206:TYR:HB2  | 2:E:207:PRO:HD3  | 2.02                     | 0.42              |
| 3:F:82:TYR:HB2   | 3:F:90:PRO:HD3   | 2.02                     | 0.42              |
| 2:B:36:PHE:N     | 2:B:37:PRO:HD2   | 2.35                     | 0.42              |
| 3:C:30:LYS:HE3   | 3:C:30:LYS:HB3   | 1.89                     | 0.42              |
| 2:E:107:PHE:HE2  | 8:E:506:PGV:H311 | 1.84                     | 0.42              |
| 1:A:51:LYS:HZ1   | 1:A:58:ARG:HH11  | 1.67                     | 0.42              |
| 3:C:82:TYR:HB2   | 3:C:90:PRO:HD3   | 2.02                     | 0.42              |

Continued on next page...

Continued from previous page...

| Atom-1           | Atom-2           | Interatomic distance (Å) | Clash overlap (Å) |
|------------------|------------------|--------------------------|-------------------|
| 2:E:193:VAL:HG12 | 2:E:197:ARG:HH21 | 1.85                     | 0.42              |
| 1:A:8:PHE:HB3    | 1:A:11:ILE:HG22  | 2.01                     | 0.42              |
| 1:D:108:VAL:H    | 1:D:160:PRO:HD3  | 1.85                     | 0.42              |
| 6:B:503:AMY:C7   | 6:B:503:AMY:H261 | 2.49                     | 0.41              |
| 1:D:54:PRO:HB3   | 1:D:73:PRO:HD3   | 2.01                     | 0.41              |
| 2:E:236:LYS:HD2  | 2:E:236:LYS:HA   | 1.67                     | 0.41              |
| 2:E:74:THR:O     | 2:E:78:MET:HB2   | 2.20                     | 0.41              |
| 3:F:159:ILE:HD11 | 9:F:501:HEC:HMB2 | 1.99                     | 0.41              |
| 2:B:193:VAL:HG12 | 2:B:197:ARG:HH21 | 1.85                     | 0.41              |
| 3:C:169:THR:HA   | 1:D:138:HIS:HD2  | 1.85                     | 0.41              |
| 3:C:33:GLU:OE1   | 3:C:33:GLU:HA    | 2.21                     | 0.41              |
| 1:A:113:HIS:CD2  | 1:A:114:LEU:HG   | 2.55                     | 0.41              |
| 2:B:262:LEU:HA   | 2:B:262:LEU:HD23 | 1.89                     | 0.41              |
| 6:B:503:AMY:C27  | 6:B:503:AMY:C21  | 2.86                     | 0.41              |
| 3:C:224:LEU:HA   | 3:C:224:LEU:HD12 | 1.85                     | 0.41              |
| 3:C:91:LYS:HB2   | 3:C:91:LYS:HE2   | 1.82                     | 0.41              |
| 2:B:38:TYR:CD1   | 2:B:226:ILE:HD11 | 2.56                     | 0.41              |
| 2:B:107:PHE:CE2  | 8:B:506:PGV:H311 | 2.56                     | 0.41              |
| 3:C:76:LEU:HD12  | 3:C:143:LEU:HB2  | 2.02                     | 0.41              |
| 1:D:113:HIS:CD2  | 1:D:114:LEU:HG   | 2.55                     | 0.41              |
| 3:F:33:GLU:OE1   | 3:F:33:GLU:HA    | 2.20                     | 0.41              |
| 3:F:83:ILE:O     | 3:F:89:ASN:HB2   | 2.19                     | 0.41              |
| 1:A:108:VAL:H    | 1:A:160:PRO:HD3  | 1.85                     | 0.41              |
| 6:B:503:AMY:H182 | 6:B:503:AMY:H272 | 2.02                     | 0.41              |
| 1:D:49:VAL:O     | 1:D:49:VAL:HG12  | 2.21                     | 0.41              |
| 2:B:233:GLU:HG3  | 2:B:234:TYR:HD1  | 1.85                     | 0.41              |
| 3:C:38:ASP:C     | 3:C:40:GLU:H     | 2.24                     | 0.41              |
| 2:E:139:SER:HB2  | 2:E:198:VAL:HG13 | 2.03                     | 0.41              |
| 3:F:146:MET:HG2  | 9:F:501:HEC:HMA3 | 2.03                     | 0.41              |
| 3:F:99:SER:O     | 3:F:99:SER:OG    | 2.34                     | 0.41              |
| 1:A:48:ASP:O     | 1:A:51:LYS:HG2   | 2.20                     | 0.41              |
| 1:D:8:PHE:HB3    | 1:D:11:ILE:HG22  | 2.01                     | 0.41              |
| 2:E:272:HIS:CE1  | 3:F:25:PHE:HB3   | 2.56                     | 0.41              |
| 1:A:55:MET:O     | 1:A:120:TRP:NE1  | 2.45                     | 0.41              |
| 6:B:503:AMY:H11  | 6:B:503:AMY:O9   | 2.21                     | 0.41              |
| 1:D:48:ASP:O     | 1:D:51:LYS:HG2   | 2.20                     | 0.41              |
| 6:E:503:AMY:C7   | 6:E:503:AMY:H261 | 2.50                     | 0.41              |
| 3:F:76:LEU:HD12  | 3:F:143:LEU:HB2  | 2.02                     | 0.41              |
| 3:F:173:GLN:C    | 3:F:175:PHE:H    | 2.24                     | 0.41              |
| 3:C:106:PHE:HA   | 3:C:107:GLY:HA2  | 1.71                     | 0.41              |
| 3:C:173:GLN:C    | 3:C:175:PHE:H    | 2.24                     | 0.41              |

Continued on next page...

Continued from previous page...

| Atom-1           | Atom-2           | Interatomic distance (Å) | Clash overlap (Å) |
|------------------|------------------|--------------------------|-------------------|
| 3:F:38:ASP:C     | 3:F:40:GLU:H     | 2.24                     | 0.41              |
| 2:E:38:TYR:CD1   | 2:E:226:ILE:HD11 | 2.56                     | 0.40              |
| 2:E:247:HIS:HA   | 2:E:248:PRO:HA   | 1.87                     | 0.40              |
| 3:F:104:TYR:HA   | 3:F:109:LEU:HA   | 2.03                     | 0.40              |
| 2:B:25:MET:HB3   | 2:B:247:HIS:HB2  | 2.03                     | 0.40              |
| 1:D:119:LEU:O    | 1:D:133:PHE:HB2  | 2.22                     | 0.40              |
| 2:E:178:GLU:HG2  | 2:E:181:VAL:HG12 | 2.03                     | 0.40              |
| 2:E:25:MET:HB3   | 2:E:247:HIS:HB2  | 2.03                     | 0.40              |
| 2:E:391:LEU:HD23 | 2:E:391:LEU:HA   | 1.87                     | 0.40              |
| 1:A:119:LEU:O    | 1:A:133:PHE:HB2  | 2.22                     | 0.40              |
| 1:A:49:VAL:O     | 1:A:49:VAL:HG12  | 2.21                     | 0.40              |
| 2:E:107:PHE:CE2  | 8:E:506:PGV:H311 | 2.56                     | 0.40              |
| 2:E:233:GLU:HG3  | 2:E:234:TYR:HD1  | 1.85                     | 0.40              |
| 2:E:294:ILE:HD12 | 2:E:294:ILE:HA   | 1.88                     | 0.40              |
| 2:B:139:SER:HB2  | 2:B:198:VAL:HG13 | 2.03                     | 0.40              |
| 2:B:330:LEU:HD12 | 2:B:388:PHE:HE1  | 1.86                     | 0.40              |
| 2:B:72:SER:O     | 2:B:76:SER:HB3   | 2.22                     | 0.40              |
| 1:D:148:VAL:HG11 | 1:D:153:PRO:HG2  | 2.04                     | 0.40              |
| 2:E:140:GLY:HA3  | 2:E:202:HIS:CE1  | 2.57                     | 0.40              |
| 8:B:507:PGV:H311 | 8:B:507:PGV:H282 | 1.89                     | 0.40              |
| 2:E:170:LYS:HE3  | 2:E:172:ILE:HG21 | 2.03                     | 0.40              |
| 2:E:330:LEU:HD12 | 2:E:388:PHE:HE1  | 1.86                     | 0.40              |

There are no symmetry-related clashes.

## 5.3 Torsion angles [i](#)

### 5.3.1 Protein backbone [i](#)

In the following table, the Percentiles column shows the percent Ramachandran outliers of the chain as a percentile score with respect to all PDB entries followed by that with respect to all EM entries.

The Analysed column shows the number of residues for which the backbone conformation was analysed, and the total number of residues.

| Mol | Chain | Analysed      | Favoured  | Allowed  | Outliers | Percentiles |     |
|-----|-------|---------------|-----------|----------|----------|-------------|-----|
| 1   | A     | 128/181 (71%) | 107 (84%) | 21 (16%) | 0        | 100         | 100 |
| 1   | D     | 128/181 (71%) | 107 (84%) | 21 (16%) | 0        | 100         | 100 |
| 2   | B     | 393/410 (96%) | 362 (92%) | 31 (8%)  | 0        | 100         | 100 |

Continued on next page...

Continued from previous page...

| Mol | Chain | Analysed        | Favoured   | Allowed   | Outliers | Percentiles |     |
|-----|-------|-----------------|------------|-----------|----------|-------------|-----|
| 2   | E     | 393/410 (96%)   | 362 (92%)  | 31 (8%)   | 0        | 100         | 100 |
| 3   | C     | 234/240 (98%)   | 205 (88%)  | 28 (12%)  | 1 (0%)   | 36          | 36  |
| 3   | F     | 234/240 (98%)   | 205 (88%)  | 28 (12%)  | 1 (0%)   | 36          | 36  |
| All | All   | 1510/1662 (91%) | 1348 (89%) | 160 (11%) | 2 (0%)   | 56          | 53  |

All (2) Ramachandran outliers are listed below:

| Mol | Chain | Res | Type |
|-----|-------|-----|------|
| 3   | C     | 141 | PRO  |
| 3   | F     | 141 | PRO  |

### 5.3.2 Protein sidechains [i](#)

In the following table, the Percentiles column shows the percent sidechain outliers of the chain as a percentile score with respect to all PDB entries followed by that with respect to all EM entries.

The Analysed column shows the number of residues for which the sidechain conformation was analysed, and the total number of residues.

| Mol | Chain | Analysed        | Rotameric  | Outliers | Percentiles |    |
|-----|-------|-----------------|------------|----------|-------------|----|
| 1   | A     | 108/145 (74%)   | 102 (94%)  | 6 (6%)   | 23          | 23 |
| 1   | D     | 108/145 (74%)   | 102 (94%)  | 6 (6%)   | 23          | 23 |
| 2   | B     | 339/350 (97%)   | 338 (100%) | 1 (0%)   | 93          | 93 |
| 2   | E     | 339/350 (97%)   | 338 (100%) | 1 (0%)   | 93          | 93 |
| 3   | C     | 206/210 (98%)   | 200 (97%)  | 6 (3%)   | 45          | 45 |
| 3   | F     | 206/210 (98%)   | 200 (97%)  | 6 (3%)   | 45          | 45 |
| All | All   | 1306/1410 (93%) | 1280 (98%) | 26 (2%)  | 61          | 58 |

All (26) residues with a non-rotameric sidechain are listed below:

| Mol | Chain | Res | Type |
|-----|-------|-----|------|
| 1   | A     | 11  | ILE  |
| 1   | A     | 13  | ILE  |
| 1   | A     | 44  | LYS  |
| 1   | A     | 52  | ILE  |
| 1   | A     | 59  | VAL  |
| 1   | A     | 143 | THR  |

Continued on next page...



Continued from previous page...

| Mol | Chain | Res | Type |
|-----|-------|-----|------|
| 2   | B     | 108 | THR  |
| 3   | C     | 93  | LYS  |
| 3   | C     | 97  | LYS  |
| 3   | C     | 106 | PHE  |
| 3   | C     | 127 | ASP  |
| 3   | C     | 160 | LEU  |
| 3   | C     | 164 | LYS  |
| 1   | D     | 11  | ILE  |
| 1   | D     | 13  | ILE  |
| 1   | D     | 44  | LYS  |
| 1   | D     | 52  | ILE  |
| 1   | D     | 59  | VAL  |
| 1   | D     | 143 | THR  |
| 2   | E     | 108 | THR  |
| 3   | F     | 93  | LYS  |
| 3   | F     | 97  | LYS  |
| 3   | F     | 106 | PHE  |
| 3   | F     | 127 | ASP  |
| 3   | F     | 160 | LEU  |
| 3   | F     | 164 | LYS  |

Some sidechains can be flipped to improve hydrogen bonding and reduce clashes. All (15) such sidechains are listed below:

| Mol | Chain | Res | Type |
|-----|-------|-----|------|
| 1   | A     | 113 | HIS  |
| 2   | B     | 51  | GLN  |
| 2   | B     | 147 | GLN  |
| 2   | B     | 321 | ASN  |
| 2   | B     | 373 | ASN  |
| 3   | C     | 161 | ASN  |
| 3   | C     | 198 | ASN  |
| 3   | C     | 232 | ASN  |
| 1   | D     | 113 | HIS  |
| 2   | E     | 51  | GLN  |
| 2   | E     | 321 | ASN  |
| 2   | E     | 373 | ASN  |
| 3   | F     | 161 | ASN  |
| 3   | F     | 198 | ASN  |
| 3   | F     | 232 | ASN  |

### 5.3.3 RNA [i](#)

There are no RNA molecules in this entry.

### 5.4 Non-standard residues in protein, DNA, RNA chains [i](#)

There are no non-standard protein/DNA/RNA residues in this entry.

### 5.5 Carbohydrates [i](#)

There are no carbohydrates in this entry.

### 5.6 Ligand geometry [i](#)

Of 17 ligands modelled in this entry, 4 could not be matched to an existing wwPDB Chemical Component Dictionary definition at this stage - leaving 13 for Mogul analysis.

In the following table, the Counts columns list the number of bonds (or angles) for which Mogul statistics could be retrieved, the number of bonds (or angles) that are observed in the model and the number of bonds (or angles) that are defined in the Chemical Component Dictionary. The Link column lists molecule types, if any, to which the group is linked. The Z score for a bond length (or angle) is the number of standard deviations the observed value is removed from the expected value. A bond length (or angle) with  $|Z| > 2$  is considered an outlier worth inspection. RMSZ is the root-mean-square of all Z scores of the bond lengths (or angles).

| Mol | Type | Chain | Res | Link | Bond lengths |      |          | Bond angles |      |          |
|-----|------|-------|-----|------|--------------|------|----------|-------------|------|----------|
|     |      |       |     |      | Counts       | RMSZ | # Z  > 2 | Counts      | RMSZ | # Z  > 2 |
| 4   | FES  | A     | 501 | 1    | 0,4,4        | 0.00 | -        | -           | -    | -        |
| 5   | HEM  | B     | 501 | 2    | 27,50,50     | 2.03 | 4 (14%)  | 17,82,82    | 1.55 | 4 (23%)  |
| 5   | HEM  | B     | 502 | 2    | 27,50,50     | 1.82 | 4 (14%)  | 17,82,82    | 1.72 | 5 (29%)  |
| 6   | AMY  | B     | 503 | -    | 39,39,39     | 1.86 | 8 (20%)  | 36,53,53    | 2.11 | 9 (25%)  |
| 8   | PGV  | B     | 506 | 2    | 50,50,50     | 0.88 | 3 (6%)   | 53,56,56    | 0.86 | 1 (1%)   |
| 8   | PGV  | B     | 507 | -    | 50,50,50     | 0.88 | 4 (8%)   | 53,56,56    | 0.86 | 2 (3%)   |
| 9   | HEC  | C     | 501 | 3    | 26,50,50     | 2.44 | 4 (15%)  | 18,82,82    | 2.21 | 6 (33%)  |
| 4   | FES  | D     | 501 | 1    | 0,4,4        | 0.00 | -        | -           | -    | -        |
| 5   | HEM  | E     | 501 | 2    | 27,50,50     | 2.03 | 4 (14%)  | 17,82,82    | 1.54 | 4 (23%)  |
| 5   | HEM  | E     | 502 | 2    | 27,50,50     | 1.83 | 4 (14%)  | 17,82,82    | 1.73 | 5 (29%)  |
| 6   | AMY  | E     | 503 | -    | 39,39,39     | 1.86 | 8 (20%)  | 36,53,53    | 2.03 | 8 (22%)  |
| 8   | PGV  | E     | 506 | 2    | 50,50,50     | 0.88 | 3 (6%)   | 53,56,56    | 0.86 | 1 (1%)   |
| 9   | HEC  | F     | 501 | 3    | 26,50,50     | 2.45 | 4 (15%)  | 18,82,82    | 2.22 | 6 (33%)  |

In the following table, the Chirals column lists the number of chiral outliers, the number of chiral centers analysed, the number of these observed in the model and the number defined in the Chemical Component Dictionary. Similar counts are reported in the Torsion and Rings columns. '2' means no outliers of that kind were identified.

| Mol | Type | Chain | Res | Link | Chirals | Torsions    | Rings   |
|-----|------|-------|-----|------|---------|-------------|---------|
| 4   | FES  | A     | 501 | 1    | -       | -           | 0/1/1/1 |
| 5   | HEM  | B     | 501 | 2    | -       | 1/6/54/54   | -       |
| 5   | HEM  | B     | 502 | 2    | -       | 2/6/54/54   | -       |
| 6   | AMY  | B     | 503 | -    | -       | 17/37/52/52 | 0/1/2/2 |
| 8   | PGV  | B     | 506 | 2    | -       | 31/55/55/55 | -       |
| 8   | PGV  | B     | 507 | -    | -       | 22/55/55/55 | -       |
| 9   | HEC  | C     | 501 | 3    | -       | 5/6/54/54   | -       |
| 4   | FES  | D     | 501 | 1    | -       | -           | 0/1/1/1 |
| 5   | HEM  | E     | 501 | 2    | -       | 1/6/54/54   | -       |
| 5   | HEM  | E     | 502 | 2    | -       | 2/6/54/54   | -       |
| 6   | AMY  | E     | 503 | -    | -       | 19/37/52/52 | 0/1/2/2 |
| 8   | PGV  | E     | 506 | 2    | -       | 31/55/55/55 | -       |
| 9   | HEC  | F     | 501 | 3    | -       | 5/6/54/54   | -       |

All (50) bond length outliers are listed below:

| Mol | Chain | Res | Type | Atoms   | Z     | Observed(Å) | Ideal(Å) |
|-----|-------|-----|------|---------|-------|-------------|----------|
| 9   | F     | 501 | HEC  | C3B-C2B | -7.74 | 1.32        | 1.40     |
| 9   | C     | 501 | HEC  | C3B-C2B | -7.64 | 1.32        | 1.40     |
| 5   | B     | 501 | HEM  | C3C-C2C | -6.42 | 1.31        | 1.40     |
| 5   | E     | 501 | HEM  | C3C-C2C | -6.39 | 1.31        | 1.40     |
| 9   | F     | 501 | HEC  | C3C-C2C | -6.05 | 1.34        | 1.40     |
| 9   | C     | 501 | HEC  | C3C-C2C | -6.02 | 1.34        | 1.40     |
| 5   | E     | 501 | HEM  | C3B-C2B | -5.48 | 1.32        | 1.40     |
| 5   | B     | 501 | HEM  | C3B-C2B | -5.39 | 1.32        | 1.40     |
| 6   | B     | 503 | AMY  | C2-C1   | 5.28  | 1.48        | 1.40     |
| 6   | E     | 503 | AMY  | C2-C1   | 5.27  | 1.48        | 1.40     |
| 9   | C     | 501 | HEC  | C3D-C2D | 5.00  | 1.52        | 1.37     |
| 9   | F     | 501 | HEC  | C3D-C2D | 5.00  | 1.52        | 1.37     |
| 5   | E     | 502 | HEM  | C3B-C2B | -4.84 | 1.33        | 1.40     |
| 5   | B     | 502 | HEM  | C3B-C2B | -4.79 | 1.33        | 1.40     |
| 5   | E     | 502 | HEM  | C3C-C2C | -4.70 | 1.33        | 1.40     |
| 5   | B     | 502 | HEM  | C3C-C2C | -4.68 | 1.33        | 1.40     |
| 6   | B     | 503 | AMY  | O4-C20  | 4.67  | 1.45        | 1.34     |
| 6   | E     | 503 | AMY  | O5-C14  | 4.67  | 1.45        | 1.34     |
| 6   | B     | 503 | AMY  | O5-C14  | 4.65  | 1.45        | 1.34     |
| 6   | E     | 503 | AMY  | O4-C20  | 4.57  | 1.45        | 1.34     |

Continued on next page...

Continued from previous page...

| Mol | Chain | Res | Type | Atoms   | Z     | Observed(Å) | Ideal(Å) |
|-----|-------|-----|------|---------|-------|-------------|----------|
| 6   | E     | 503 | AMY  | C6-C1   | 4.03  | 1.48        | 1.41     |
| 6   | E     | 503 | AMY  | O8-C21  | 4.02  | 1.45        | 1.34     |
| 6   | B     | 503 | AMY  | O8-C21  | 4.02  | 1.45        | 1.34     |
| 6   | B     | 503 | AMY  | C2-N1   | -3.99 | 1.35        | 1.41     |
| 6   | B     | 503 | AMY  | C6-C1   | 3.98  | 1.47        | 1.41     |
| 6   | E     | 503 | AMY  | C2-N1   | -3.97 | 1.35        | 1.41     |
| 5   | E     | 502 | HEM  | C3B-CAB | 3.22  | 1.54        | 1.47     |
| 5   | B     | 502 | HEM  | C3B-CAB | 3.18  | 1.54        | 1.47     |
| 5   | E     | 502 | HEM  | C3C-CAC | 3.17  | 1.54        | 1.47     |
| 5   | B     | 502 | HEM  | C3C-CAC | 3.16  | 1.54        | 1.47     |
| 5   | B     | 501 | HEM  | C3B-CAB | 3.06  | 1.54        | 1.47     |
| 5   | E     | 501 | HEM  | C3B-CAB | 3.03  | 1.54        | 1.47     |
| 5   | B     | 501 | HEM  | C3C-CAC | 2.86  | 1.53        | 1.47     |
| 5   | E     | 501 | HEM  | C3C-CAC | 2.83  | 1.53        | 1.47     |
| 8   | E     | 506 | PGV  | O03-C19 | 2.65  | 1.41        | 1.33     |
| 8   | B     | 506 | PGV  | O03-C19 | 2.64  | 1.41        | 1.33     |
| 8   | B     | 507 | PGV  | O01-C02 | -2.57 | 1.40        | 1.46     |
| 9   | F     | 501 | HEC  | CAD-C3D | 2.38  | 1.55        | 1.52     |
| 9   | C     | 501 | HEC  | CAD-C3D | 2.34  | 1.55        | 1.52     |
| 6   | E     | 503 | AMY  | O4-C11  | -2.30 | 1.42        | 1.46     |
| 8   | B     | 507 | PGV  | O03-C19 | 2.30  | 1.40        | 1.33     |
| 8   | E     | 506 | PGV  | O01-C1  | 2.27  | 1.40        | 1.34     |
| 8   | B     | 506 | PGV  | O01-C1  | 2.27  | 1.40        | 1.34     |
| 6   | B     | 503 | AMY  | O5-C10  | -2.25 | 1.42        | 1.46     |
| 8   | B     | 507 | PGV  | O03-C01 | -2.24 | 1.40        | 1.45     |
| 8   | B     | 506 | PGV  | O01-C02 | -2.21 | 1.41        | 1.46     |
| 8   | E     | 506 | PGV  | O01-C02 | -2.18 | 1.41        | 1.46     |
| 6   | E     | 503 | AMY  | O5-C10  | -2.15 | 1.43        | 1.46     |
| 8   | B     | 507 | PGV  | O01-C1  | 2.05  | 1.40        | 1.34     |
| 6   | B     | 503 | AMY  | O4-C11  | -2.03 | 1.43        | 1.46     |

All (51) bond angle outliers are listed below:

| Mol | Chain | Res | Type | Atoms       | Z     | Observed(°) | Ideal(°) |
|-----|-------|-----|------|-------------|-------|-------------|----------|
| 6   | B     | 503 | AMY  | O4-C20-C9   | 6.61  | 120.68      | 110.28   |
| 6   | E     | 503 | AMY  | O4-C20-C9   | 6.28  | 120.16      | 110.28   |
| 6   | B     | 503 | AMY  | O8-C21-C22  | 4.96  | 120.67      | 111.45   |
| 9   | C     | 501 | HEC  | C1D-C2D-C3D | -4.58 | 103.81      | 107.00   |
| 9   | F     | 501 | HEC  | C1D-C2D-C3D | -4.57 | 103.82      | 107.00   |
| 6   | E     | 503 | AMY  | O8-C21-C22  | 4.42  | 119.67      | 111.45   |
| 6   | B     | 503 | AMY  | O4-C20-O7   | -4.30 | 118.66      | 124.08   |
| 8   | B     | 506 | PGV  | O01-C1-C2   | 4.26  | 120.80      | 111.51   |

Continued on next page...

Continued from previous page...

| Mol | Chain | Res | Type | Atoms       | Z     | Observed(°) | Ideal(°) |
|-----|-------|-----|------|-------------|-------|-------------|----------|
| 8   | E     | 506 | PGV  | O01-C1-C2   | 4.25  | 120.79      | 111.51   |
| 6   | E     | 503 | AMY  | O4-C20-O7   | -4.15 | 118.85      | 124.08   |
| 8   | B     | 507 | PGV  | O01-C1-C2   | 3.96  | 120.15      | 111.51   |
| 6   | E     | 503 | AMY  | O5-C14-O6   | -3.74 | 119.37      | 124.08   |
| 9   | C     | 501 | HEC  | CAD-CBD-CGD | -3.74 | 106.28      | 112.66   |
| 9   | F     | 501 | HEC  | CMC-C2C-C1C | -3.73 | 122.74      | 128.46   |
| 9   | F     | 501 | HEC  | CAD-CBD-CGD | -3.71 | 106.33      | 112.66   |
| 6   | B     | 503 | AMY  | O2-C8-N1    | -3.70 | 121.00      | 125.79   |
| 9   | C     | 501 | HEC  | CMC-C2C-C1C | -3.70 | 122.78      | 128.46   |
| 6   | E     | 503 | AMY  | O2-C8-N1    | -3.65 | 121.06      | 125.79   |
| 6   | B     | 503 | AMY  | O5-C14-O6   | -3.48 | 119.70      | 124.08   |
| 5   | E     | 502 | HEM  | CAD-CBD-CGD | -3.34 | 106.95      | 112.66   |
| 5   | B     | 502 | HEM  | CAD-CBD-CGD | -3.34 | 106.95      | 112.66   |
| 9   | F     | 501 | HEC  | CMC-C2C-C3C | 3.02  | 129.38      | 125.82   |
| 9   | C     | 501 | HEC  | CMC-C2C-C3C | 2.96  | 129.31      | 125.82   |
| 5   | B     | 501 | HEM  | CAD-CBD-CGD | -2.91 | 107.69      | 112.66   |
| 5   | E     | 501 | HEM  | CAD-CBD-CGD | -2.89 | 107.72      | 112.66   |
| 6   | E     | 503 | AMY  | C2-N1-C8    | -2.88 | 121.08      | 126.74   |
| 5   | E     | 501 | HEM  | CAA-CBA-CGA | -2.84 | 107.81      | 112.66   |
| 6   | B     | 503 | AMY  | C2-N1-C8    | -2.82 | 121.20      | 126.74   |
| 5   | B     | 501 | HEM  | CAA-CBA-CGA | -2.81 | 107.86      | 112.66   |
| 5   | B     | 502 | HEM  | CMC-C2C-C3C | 2.74  | 129.95      | 124.80   |
| 5   | E     | 502 | HEM  | CMC-C2C-C3C | 2.74  | 129.94      | 124.80   |
| 5   | E     | 501 | HEM  | CBD-CAD-C3D | -2.58 | 107.55      | 112.47   |
| 5   | B     | 501 | HEM  | CBD-CAD-C3D | -2.57 | 107.56      | 112.47   |
| 8   | B     | 507 | PGV  | O03-C19-C20 | 2.52  | 120.03      | 111.93   |
| 5   | E     | 502 | HEM  | C4A-C3A-C2A | 2.51  | 108.74      | 107.00   |
| 6   | E     | 503 | AMY  | C9-N2-C7    | 2.49  | 126.11      | 121.49   |
| 6   | B     | 503 | AMY  | C9-N2-C7    | 2.46  | 126.05      | 121.49   |
| 5   | E     | 502 | HEM  | CAA-CBA-CGA | -2.41 | 108.55      | 112.66   |
| 5   | B     | 502 | HEM  | C4A-C3A-C2A | 2.41  | 108.67      | 107.00   |
| 5   | B     | 502 | HEM  | CAA-CBA-CGA | -2.40 | 108.56      | 112.66   |
| 5   | B     | 502 | HEM  | CMB-C2B-C3B | 2.39  | 129.28      | 124.80   |
| 9   | C     | 501 | HEC  | CAA-CBA-CGA | -2.38 | 108.59      | 112.66   |
| 5   | E     | 502 | HEM  | CMB-C2B-C3B | 2.37  | 129.25      | 124.80   |
| 9   | F     | 501 | HEC  | CAA-CBA-CGA | -2.37 | 108.61      | 112.66   |
| 6   | B     | 503 | AMY  | C12-O8-C21  | -2.30 | 113.76      | 117.58   |
| 5   | E     | 501 | HEM  | CMD-C2D-C1D | -2.09 | 125.26      | 128.46   |
| 9   | F     | 501 | HEC  | CMB-C2B-C1B | -2.06 | 125.30      | 128.46   |
| 6   | B     | 503 | AMY  | O9-C21-C22  | -2.06 | 120.10      | 124.71   |
| 5   | B     | 501 | HEM  | CMD-C2D-C1D | -2.06 | 125.30      | 128.46   |
| 9   | C     | 501 | HEC  | CMB-C2B-C1B | -2.04 | 125.32      | 128.46   |

Continued on next page...

Continued from previous page...

| Mol | Chain | Res | Type | Atoms      | Z     | Observed(°) | Ideal(°) |
|-----|-------|-----|------|------------|-------|-------------|----------|
| 6   | E     | 503 | AMY  | O9-C21-C22 | -2.01 | 120.21      | 124.71   |

There are no chirality outliers.

All (136) torsion outliers are listed below:

| Mol | Chain | Res | Type | Atoms           |
|-----|-------|-----|------|-----------------|
| 5   | B     | 502 | HEM  | C1A-C2A-CAA-CBA |
| 5   | B     | 502 | HEM  | C3A-C2A-CAA-CBA |
| 5   | E     | 502 | HEM  | C1A-C2A-CAA-CBA |
| 5   | E     | 502 | HEM  | C3A-C2A-CAA-CBA |
| 8   | B     | 507 | PGV  | O12-C04-C05-C06 |
| 8   | B     | 507 | PGV  | C04-C05-C06-O06 |
| 6   | B     | 503 | AMY  | C13-C14-O5-C10  |
| 6   | B     | 503 | AMY  | O6-C14-O5-C10   |
| 6   | B     | 503 | AMY  | O2-C8-N1-C2     |
| 6   | B     | 503 | AMY  | C11-C12-C13-C15 |
| 6   | B     | 503 | AMY  | O8-C12-C13-C14  |
| 6   | B     | 503 | AMY  | C11-C12-O8-C21  |
| 6   | B     | 503 | AMY  | C13-C12-O8-C21  |
| 6   | B     | 503 | AMY  | C12-C13-C14-O6  |
| 5   | E     | 501 | HEM  | C3D-CAD-CBD-CGD |
| 9   | F     | 501 | HEC  | C1A-C2A-CAA-CBA |
| 9   | F     | 501 | HEC  | C3A-C2A-CAA-CBA |
| 9   | F     | 501 | HEC  | C4D-C3D-CAD-CBD |
| 8   | E     | 506 | PGV  | C03-O11-P-O14   |
| 8   | E     | 506 | PGV  | O02-C1-O01-C02  |
| 9   | C     | 501 | HEC  | C1A-C2A-CAA-CBA |
| 9   | C     | 501 | HEC  | C3A-C2A-CAA-CBA |
| 9   | C     | 501 | HEC  | C4D-C3D-CAD-CBD |
| 8   | B     | 506 | PGV  | C03-O11-P-O14   |
| 8   | B     | 506 | PGV  | O02-C1-O01-C02  |
| 5   | B     | 501 | HEM  | C3D-CAD-CBD-CGD |
| 6   | E     | 503 | AMY  | C13-C14-O5-C10  |
| 6   | E     | 503 | AMY  | O6-C14-O5-C10   |
| 6   | E     | 503 | AMY  | O2-C8-N1-C2     |
| 6   | E     | 503 | AMY  | O4-C11-C12-C13  |
| 6   | E     | 503 | AMY  | O4-C11-C12-O8   |
| 6   | E     | 503 | AMY  | C27-C11-C12-O8  |
| 6   | E     | 503 | AMY  | O8-C12-C13-C14  |
| 6   | E     | 503 | AMY  | C13-C12-O8-C21  |
| 6   | E     | 503 | AMY  | C12-C13-C14-O6  |
| 8   | E     | 506 | PGV  | C2-C1-O01-C02   |

Continued on next page...

Continued from previous page...

| Mol | Chain | Res | Type | Atoms           |
|-----|-------|-----|------|-----------------|
| 8   | B     | 506 | PGV  | C2-C1-O01-C02   |
| 8   | E     | 506 | PGV  | C20-C19-O03-C01 |
| 8   | B     | 506 | PGV  | C20-C19-O03-C01 |
| 6   | E     | 503 | AMY  | C6-C7-N2-C9     |
| 6   | B     | 503 | AMY  | C6-C7-N2-C9     |
| 8   | E     | 506 | PGV  | O04-C19-O03-C01 |
| 8   | B     | 506 | PGV  | O04-C19-O03-C01 |
| 8   | B     | 507 | PGV  | O12-C04-C05-O05 |
| 8   | E     | 506 | PGV  | C19-C20-C21-C22 |
| 8   | B     | 506 | PGV  | C19-C20-C21-C22 |
| 8   | B     | 507 | PGV  | C19-C20-C21-C22 |
| 8   | E     | 506 | PGV  | C03-O11-P-O12   |
| 8   | B     | 506 | PGV  | C03-O11-P-O12   |
| 6   | E     | 503 | AMY  | O3-C7-N2-C9     |
| 6   | B     | 503 | AMY  | O3-C7-N2-C9     |
| 8   | E     | 506 | PGV  | C29-C30-C31-C32 |
| 8   | E     | 506 | PGV  | C1-C2-C3-C4     |
| 8   | B     | 506 | PGV  | C1-C2-C3-C4     |
| 8   | B     | 506 | PGV  | C29-C30-C31-C32 |
| 8   | B     | 507 | PGV  | C6-C7-C8-C9     |
| 8   | B     | 507 | PGV  | C27-C28-C29-C30 |
| 8   | E     | 506 | PGV  | C23-C24-C25-C26 |
| 8   | B     | 506 | PGV  | C23-C24-C25-C26 |
| 8   | E     | 506 | PGV  | C21-C22-C23-C24 |
| 8   | B     | 506 | PGV  | C21-C22-C23-C24 |
| 8   | E     | 506 | PGV  | C04-C05-C06-O06 |
| 8   | B     | 506 | PGV  | C04-C05-C06-O06 |
| 8   | B     | 507 | PGV  | C2-C3-C4-C5     |
| 8   | B     | 507 | PGV  | C4-C5-C6-C7     |
| 6   | E     | 503 | AMY  | C22-C21-O8-C12  |
| 6   | E     | 503 | AMY  | O9-C21-O8-C12   |
| 8   | E     | 506 | PGV  | C30-C31-C32-C33 |
| 8   | B     | 506 | PGV  | C30-C31-C32-C33 |
| 8   | E     | 506 | PGV  | C2-C3-C4-C5     |
| 8   | B     | 506 | PGV  | C2-C3-C4-C5     |
| 8   | E     | 506 | PGV  | C3-C4-C5-C6     |
| 8   | B     | 506 | PGV  | C3-C4-C5-C6     |
| 8   | B     | 507 | PGV  | C23-C24-C25-C26 |
| 8   | B     | 507 | PGV  | C20-C21-C22-C23 |
| 6   | B     | 503 | AMY  | O8-C21-C22-C23  |
| 8   | B     | 507 | PGV  | C28-C29-C30-C31 |
| 8   | B     | 507 | PGV  | O05-C05-C06-O06 |

Continued on next page...

Continued from previous page...

| Mol | Chain | Res | Type | Atoms           |
|-----|-------|-----|------|-----------------|
| 8   | E     | 506 | PGV  | O05-C05-C06-O06 |
| 8   | B     | 506 | PGV  | O05-C05-C06-O06 |
| 8   | E     | 506 | PGV  | C01-C02-O01-C1  |
| 8   | B     | 506 | PGV  | C01-C02-O01-C1  |
| 8   | E     | 506 | PGV  | C22-C23-C24-C25 |
| 8   | B     | 506 | PGV  | C22-C23-C24-C25 |
| 8   | E     | 506 | PGV  | C5-C6-C7-C8     |
| 8   | B     | 506 | PGV  | C5-C6-C7-C8     |
| 8   | E     | 506 | PGV  | O01-C02-C03-O11 |
| 8   | B     | 506 | PGV  | O01-C02-C03-O11 |
| 6   | B     | 503 | AMY  | C15-C16-C17-C18 |
| 8   | B     | 507 | PGV  | C24-C25-C26-C27 |
| 8   | B     | 506 | PGV  | C31-C32-C33-C34 |
| 8   | E     | 506 | PGV  | C31-C32-C33-C34 |
| 6   | B     | 503 | AMY  | O9-C21-C22-C23  |
| 8   | B     | 507 | PGV  | C21-C22-C23-C24 |
| 8   | E     | 506 | PGV  | C20-C21-C22-C23 |
| 8   | B     | 506 | PGV  | C20-C21-C22-C23 |
| 8   | E     | 506 | PGV  | C03-O11-P-O13   |
| 8   | B     | 506 | PGV  | C03-O11-P-O13   |
| 9   | F     | 501 | HEC  | C3D-CAD-CBD-CGD |
| 9   | C     | 501 | HEC  | C3D-CAD-CBD-CGD |
| 8   | E     | 506 | PGV  | C15-C16-C17-C18 |
| 8   | B     | 506 | PGV  | C15-C16-C17-C18 |
| 8   | B     | 507 | PGV  | O01-C02-C03-O11 |
| 6   | B     | 503 | AMY  | O8-C12-C13-C15  |
| 6   | B     | 503 | AMY  | O7-C20-O4-C11   |
| 9   | F     | 501 | HEC  | C2D-C3D-CAD-CBD |
| 9   | C     | 501 | HEC  | C2D-C3D-CAD-CBD |
| 6   | E     | 503 | AMY  | O7-C20-O4-C11   |
| 8   | E     | 506 | PGV  | C6-C7-C8-C9     |
| 8   | B     | 507 | PGV  | C25-C26-C27-C28 |
| 8   | B     | 506 | PGV  | C6-C7-C8-C9     |
| 8   | E     | 506 | PGV  | C11-C12-C13-C14 |
| 8   | B     | 506 | PGV  | C11-C12-C13-C14 |
| 8   | B     | 507 | PGV  | C01-C02-C03-O11 |
| 8   | B     | 507 | PGV  | C9-C10-C11-C12  |
| 8   | B     | 506 | PGV  | C14-C15-C16-C17 |
| 8   | E     | 506 | PGV  | C14-C15-C16-C17 |
| 6   | E     | 503 | AMY  | C15-C16-C17-C18 |
| 6   | B     | 503 | AMY  | C13-C15-C16-C17 |
| 6   | B     | 503 | AMY  | C16-C17-C18-C19 |

Continued on next page...



Continued from previous page...

| Mol | Chain | Res | Type | Atoms           |
|-----|-------|-----|------|-----------------|
| 6   | E     | 503 | AMY  | C16-C17-C18-C19 |
| 8   | B     | 507 | PGV  | C15-C16-C17-C18 |
| 8   | E     | 506 | PGV  | O12-C04-C05-C06 |
| 8   | B     | 506 | PGV  | O12-C04-C05-C06 |
| 6   | E     | 503 | AMY  | C13-C15-C16-C17 |
| 8   | B     | 507 | PGV  | C11-C10-C9-C8   |
| 8   | E     | 506 | PGV  | O12-C04-C05-O05 |
| 8   | B     | 506 | PGV  | O12-C04-C05-O05 |
| 8   | E     | 506 | PGV  | C9-C10-C11-C12  |
| 8   | B     | 506 | PGV  | C9-C10-C11-C12  |
| 6   | E     | 503 | AMY  | O9-C21-C22-C23  |
| 8   | E     | 506 | PGV  | C12-C13-C14-C15 |
| 8   | B     | 506 | PGV  | C12-C13-C14-C15 |
| 8   | B     | 507 | PGV  | O03-C01-C02-O01 |
| 8   | B     | 507 | PGV  | C11-C12-C13-C14 |
| 6   | E     | 503 | AMY  | O8-C21-C22-C23  |

There are no ring outliers.

12 monomers are involved in 86 short contacts:

| Mol | Chain | Res | Type | Clashes | Symm-Clashes |
|-----|-------|-----|------|---------|--------------|
| 4   | A     | 501 | FES  | 1       | 0            |
| 5   | B     | 501 | HEM  | 3       | 0            |
| 5   | B     | 502 | HEM  | 5       | 0            |
| 6   | B     | 503 | AMY  | 25      | 0            |
| 8   | B     | 506 | PGV  | 4       | 0            |
| 8   | B     | 507 | PGV  | 2       | 0            |
| 9   | C     | 501 | HEC  | 6       | 0            |
| 5   | E     | 501 | HEM  | 3       | 0            |
| 5   | E     | 502 | HEM  | 5       | 0            |
| 6   | E     | 503 | AMY  | 20      | 0            |
| 8   | E     | 506 | PGV  | 4       | 0            |
| 9   | F     | 501 | HEC  | 8       | 0            |

The following is a two-dimensional graphical depiction of Mogul quality analysis of bond lengths, bond angles, torsion angles, and ring geometry for all instances of the Ligand of Interest. In addition, ligands with molecular weight > 250 and outliers as shown on the validation Tables will also be included. For torsion angles, if less than 5% of the Mogul distribution of torsion angles is within 10 degrees of the torsion angle in question, then that torsion angle is considered an outlier. Any bond that is central to one or more torsion angles identified as an outlier by Mogul will be highlighted in the graph. For rings, the root-mean-square deviation (RMSD) between the ring in question and similar rings identified by Mogul is calculated over all ring torsion angles. If the

average RMSD is greater than 60 degrees and the minimal RMSD between the ring in question and any Mogul-identified rings is also greater than 60 degrees, then that ring is considered an outlier. The outliers are highlighted in purple. The color gray indicates Mogul did not find sufficient equivalents in the CSD to analyse the geometry.

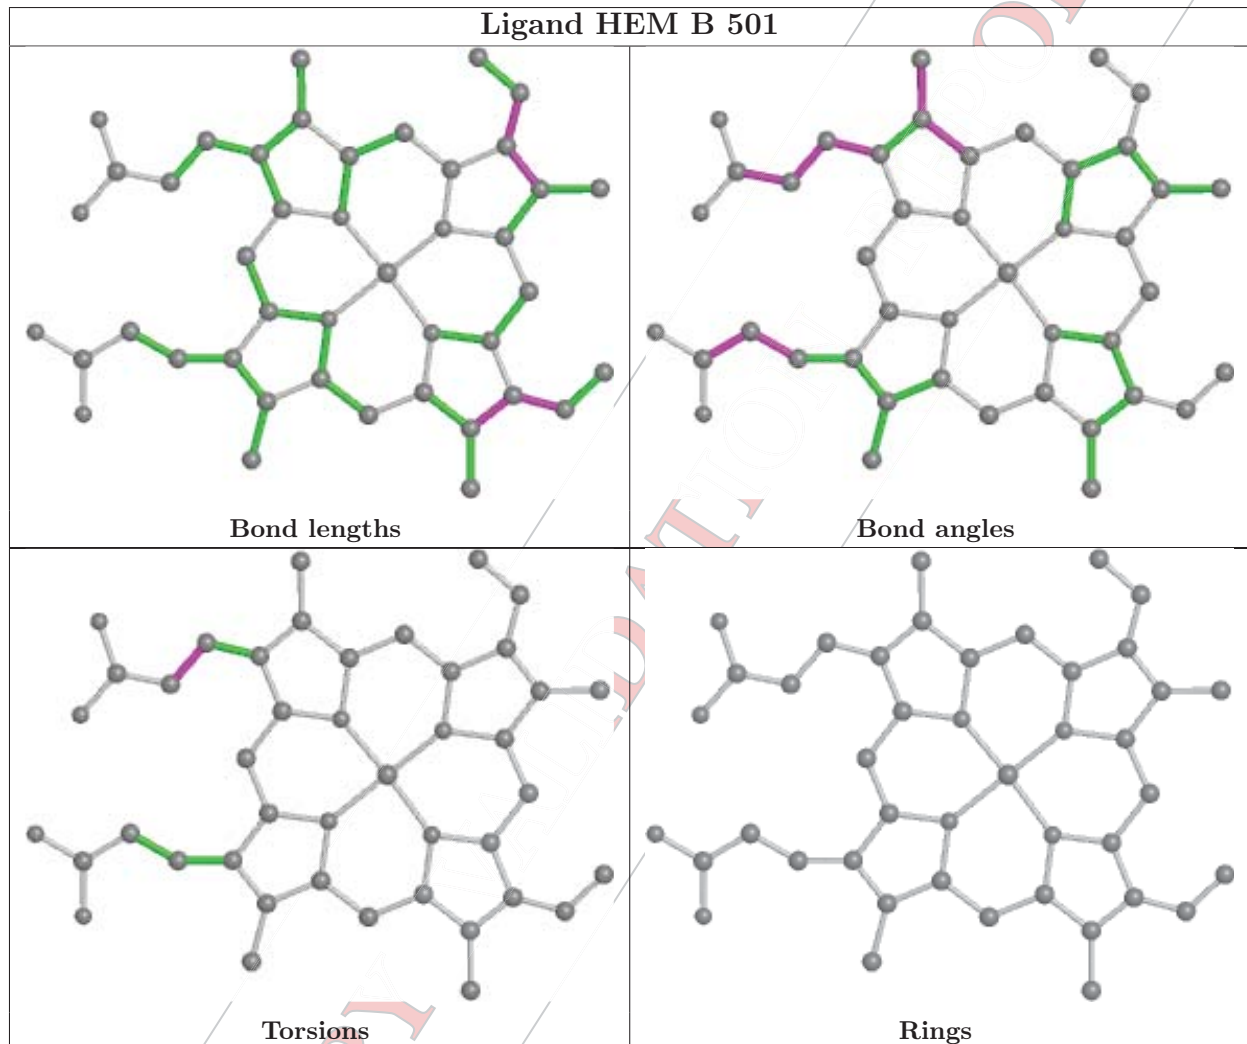

PRELIMINARY

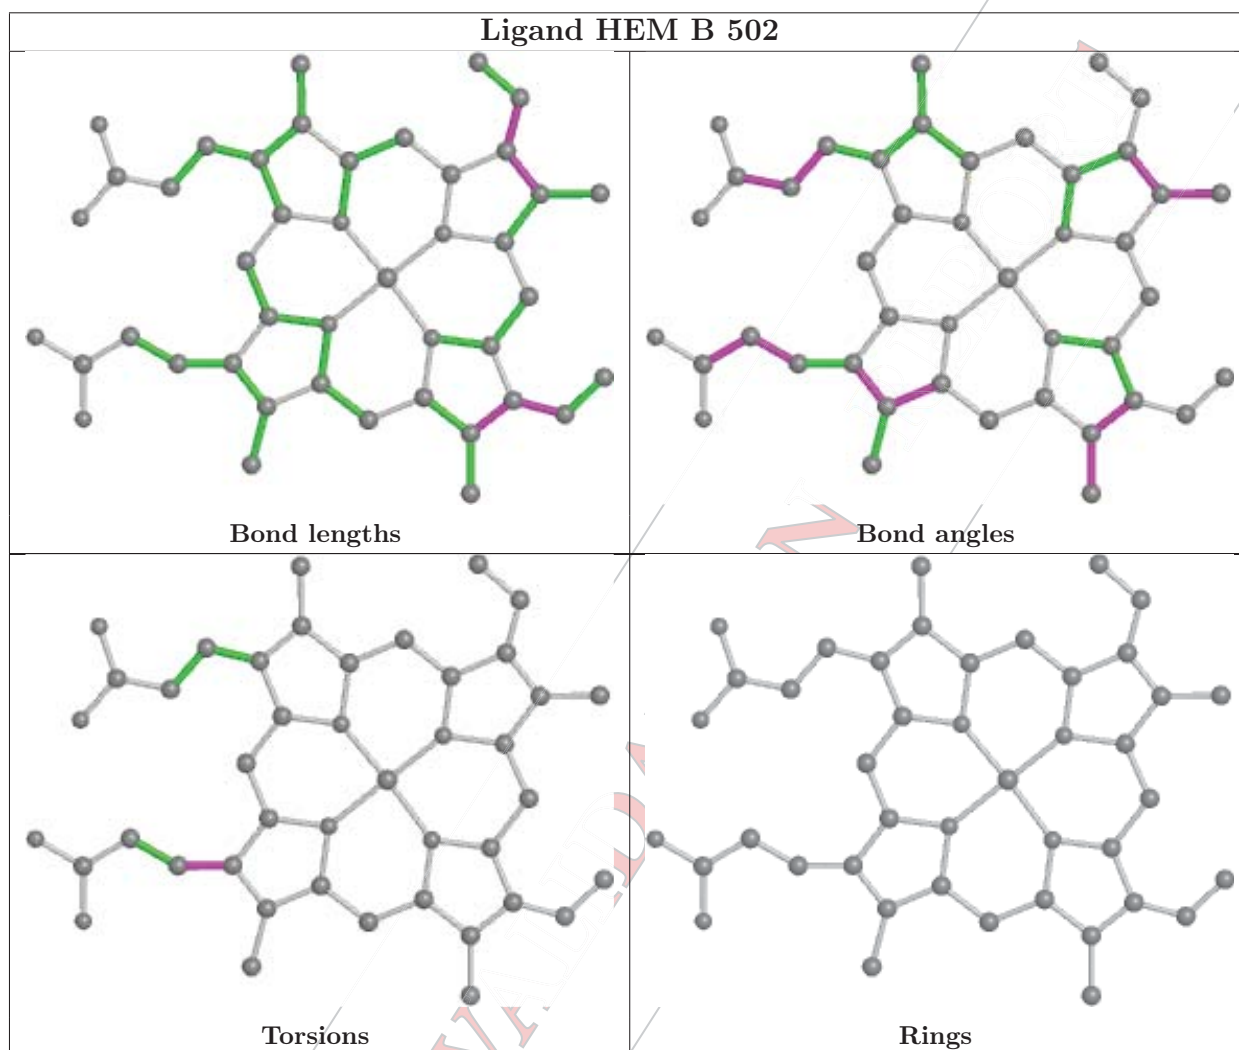

PRELIMINARY

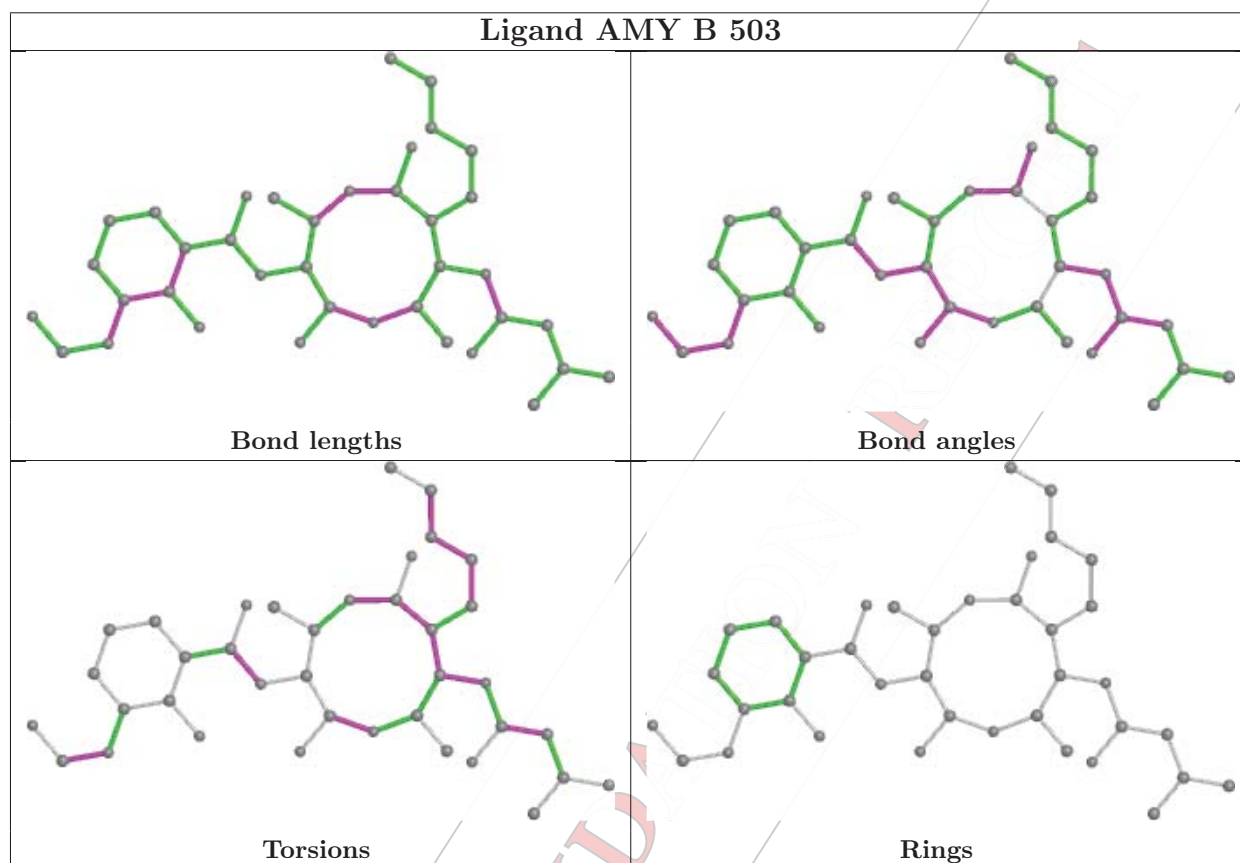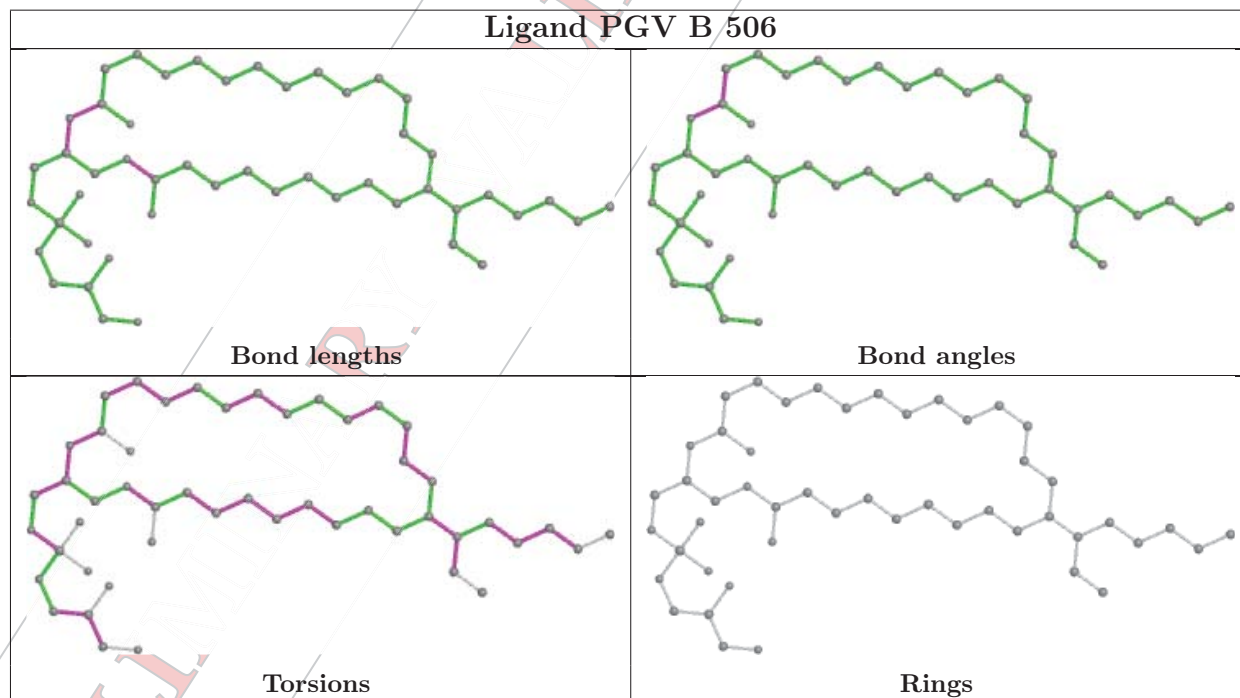

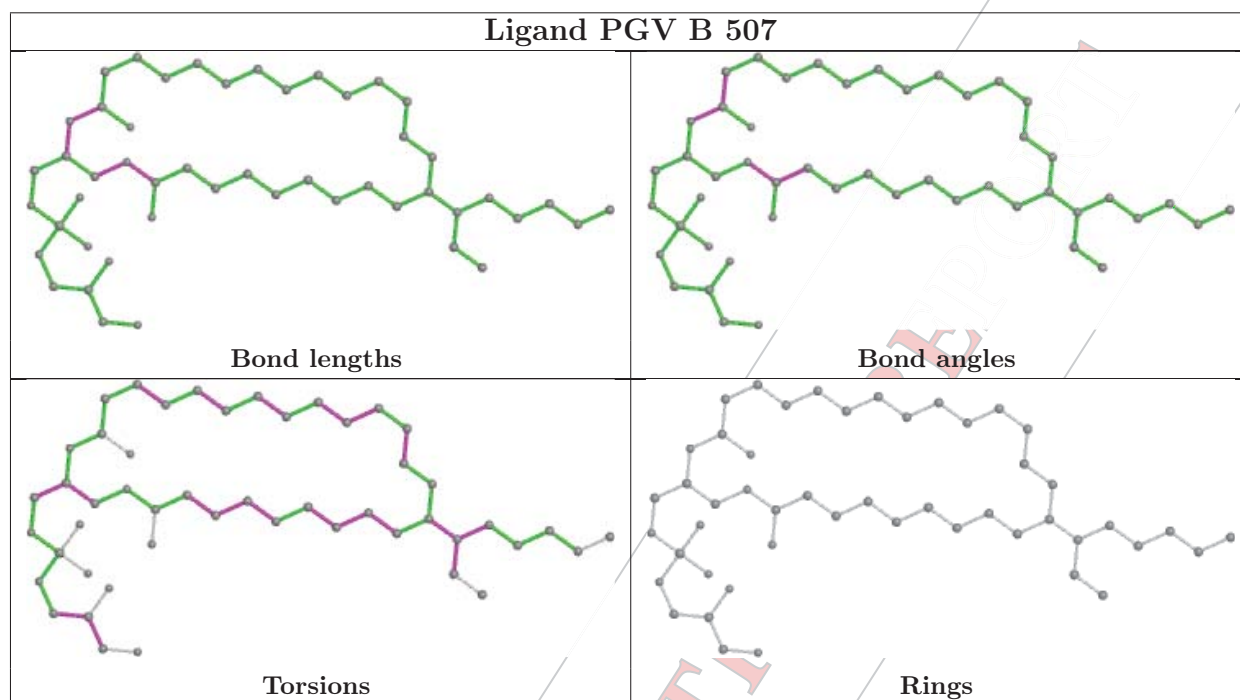

PRELIMINARY VALIDATION

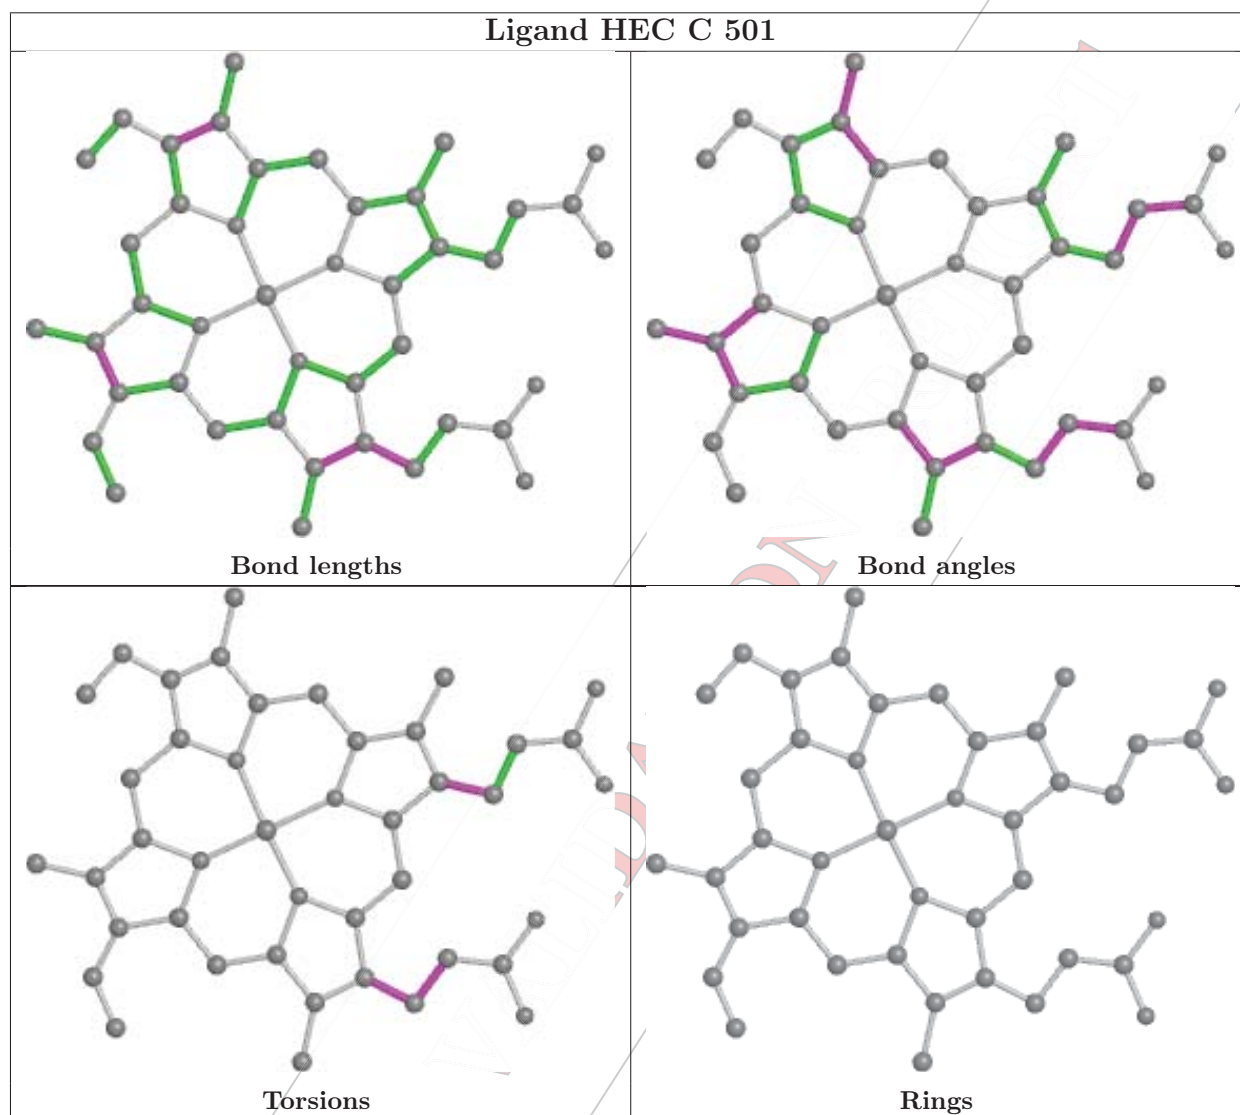

PRELIMINARY

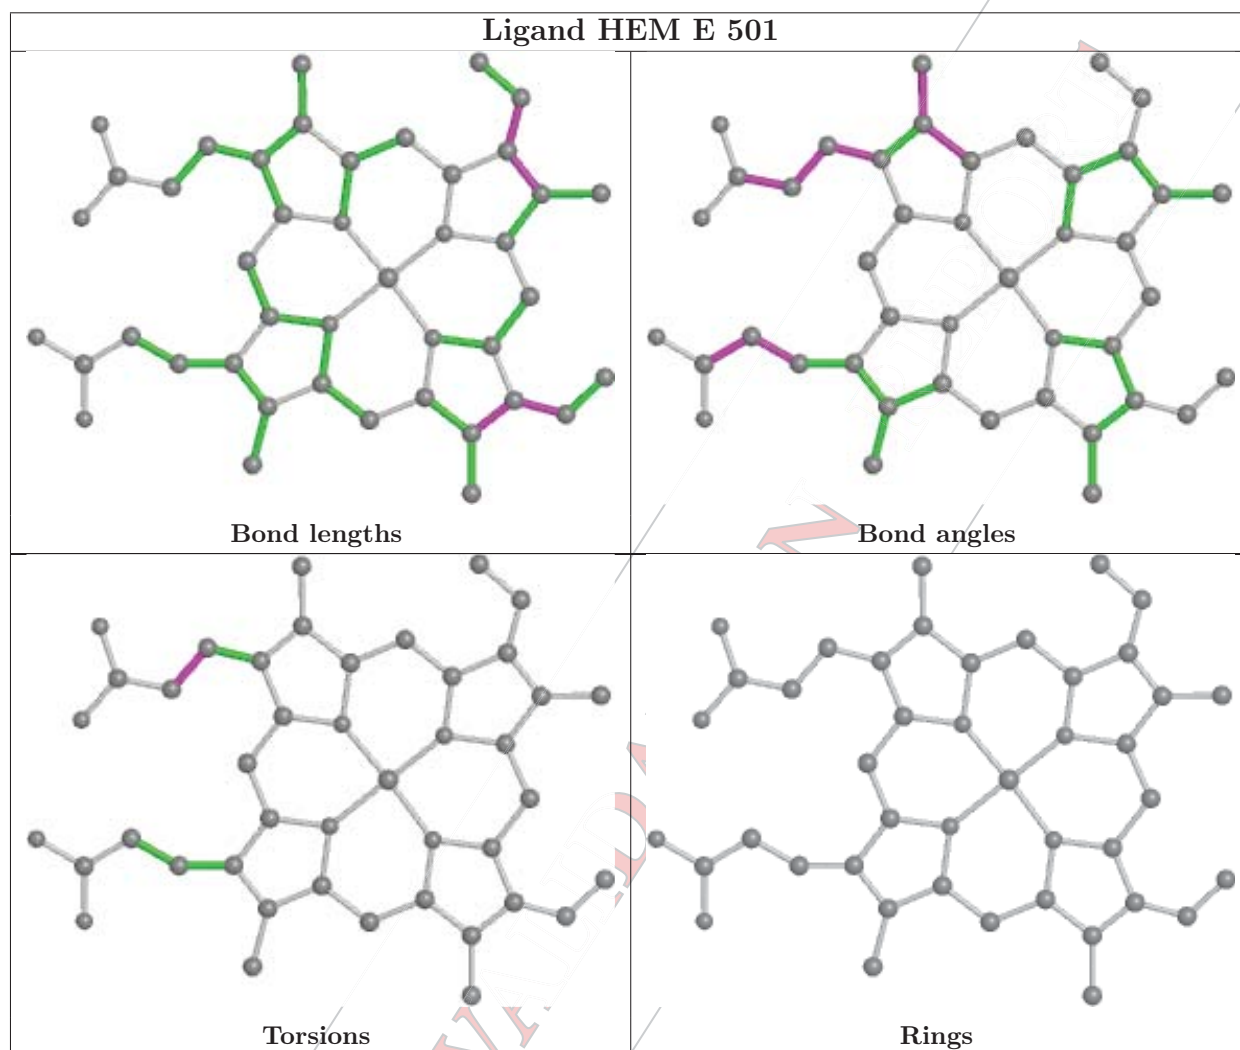

PRELIMINARY

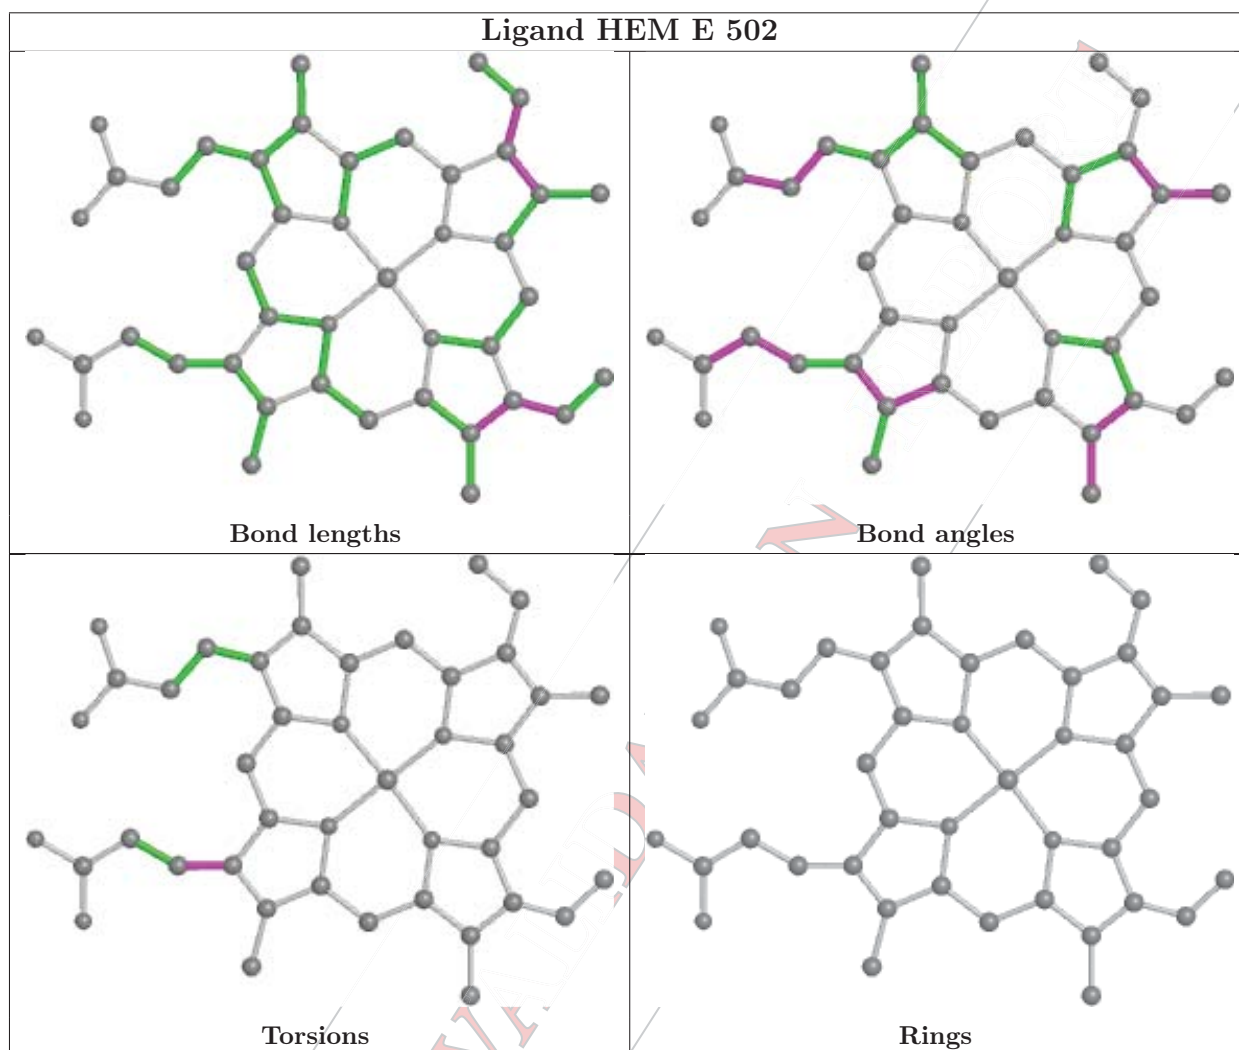

PRELIMINARY



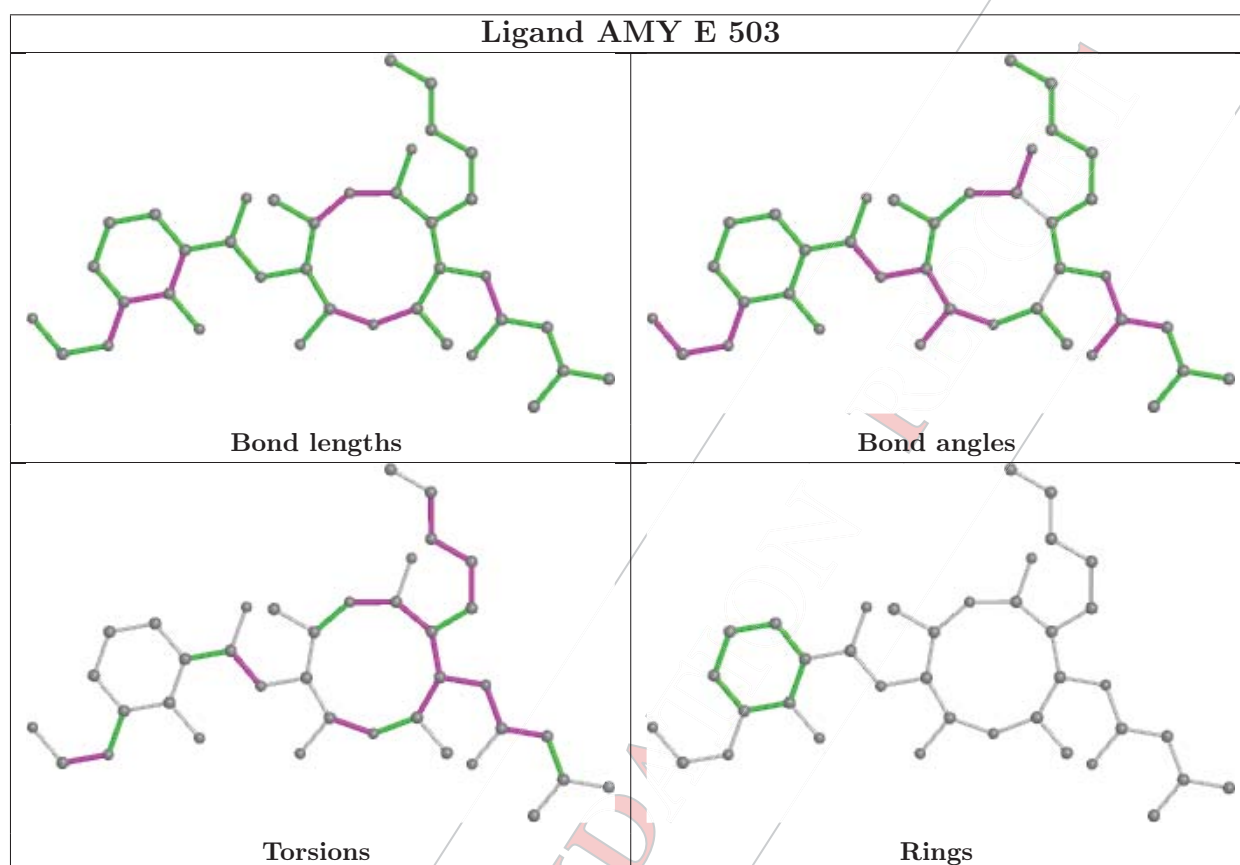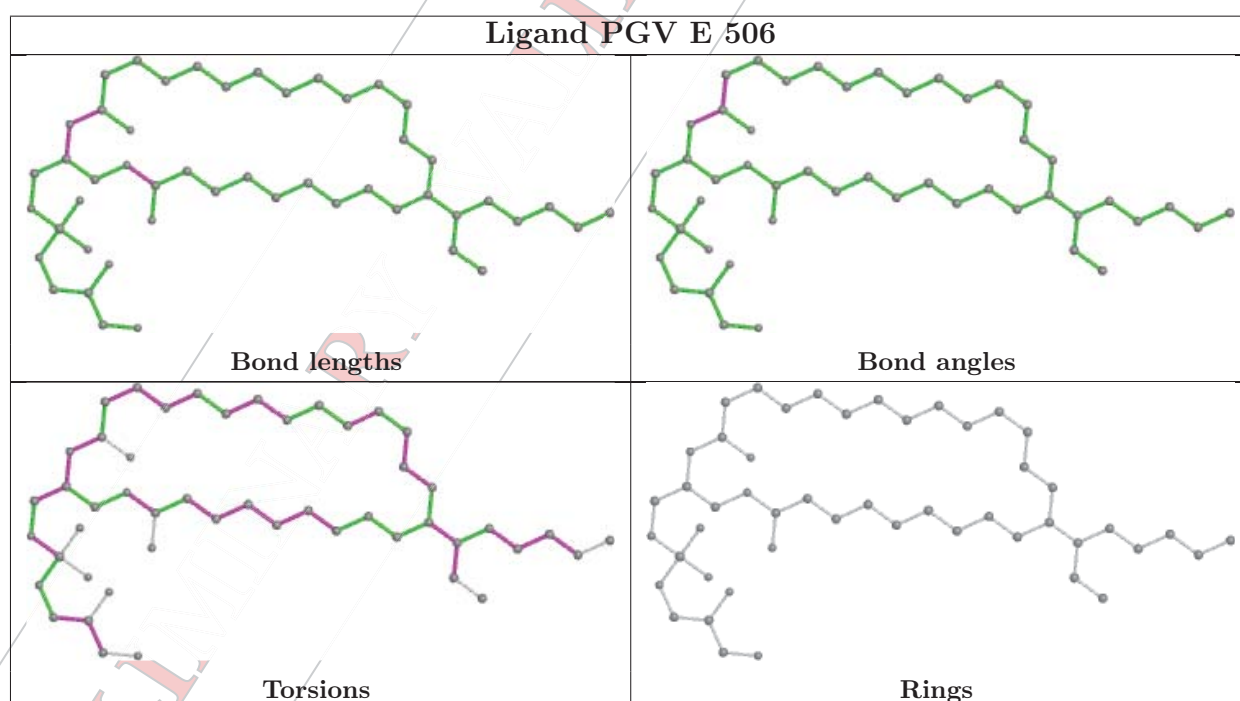

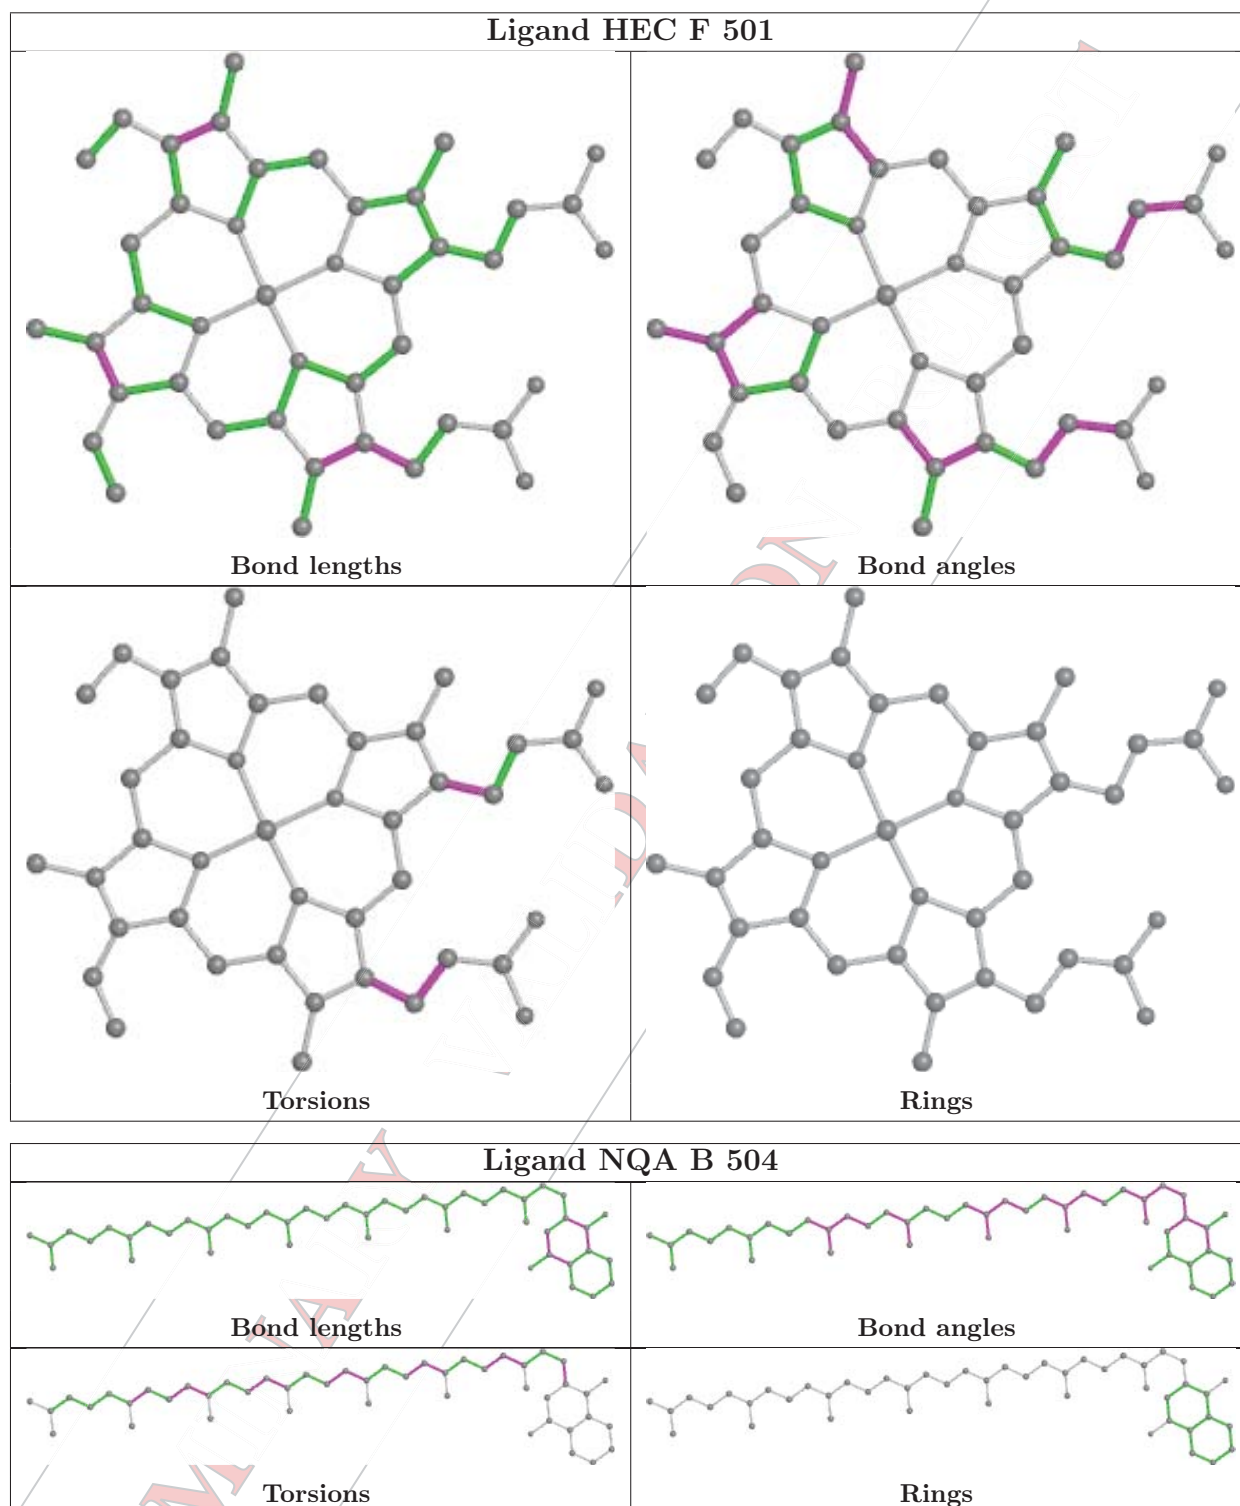

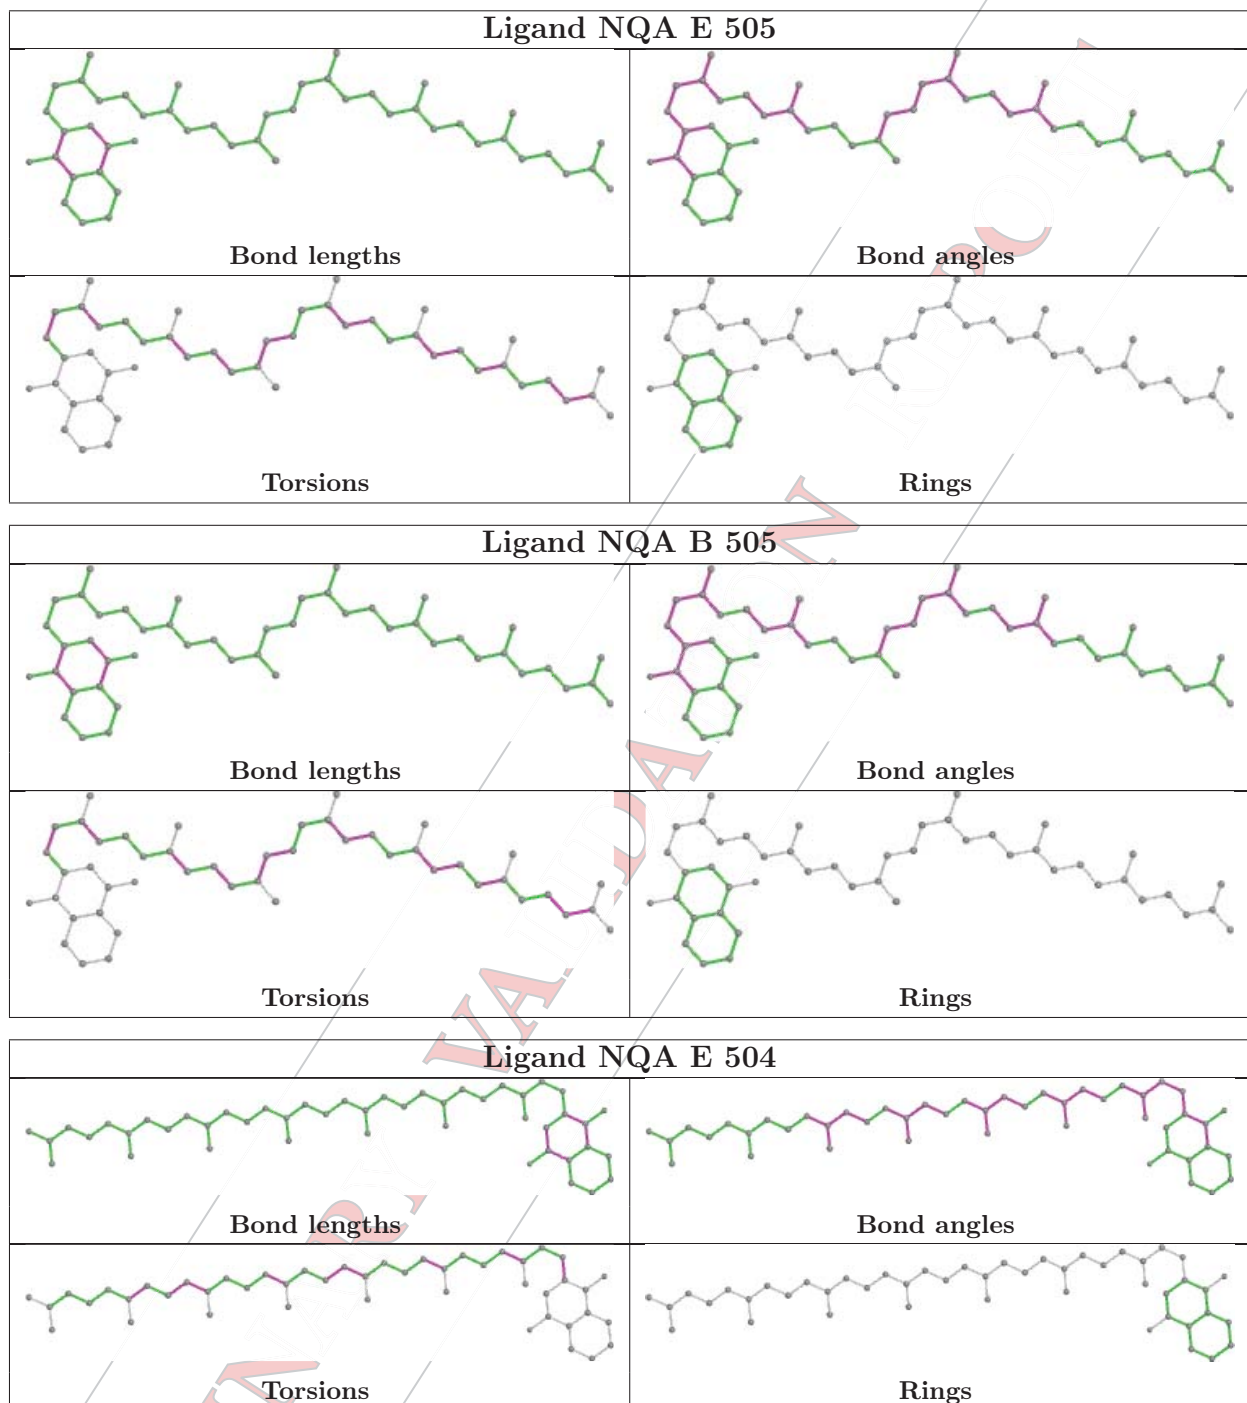

## 5.7 Other polymers [\(i\)](#)

There are no such residues in this entry.

## 5.8 Polymer linkage issues [\(i\)](#)

There are no chain breaks in this entry.
